# Supplementary material for: Combinatorial and rational synthesis of complex, base-modified aptamer libraries on microarrays
Source: RSC Adv. 2026 May 19;16(29):26976–87. doi: 10.1039/d6ra01942k (PMC13187762; doi:10.1039/d6ra01942k)
Supplement: RA-016-D6RA01942K-s001 [file RA-016-D6RA01942K-s001.xlsx]

## Sheet: CouplingEfficiency
	NPPOC dU-Ser						NPPOC dU-Tyr						NPPOC dU
	15 sec coupling		60 sec coupling				15 sec coupling		60 sec coupling				15 sec coupling		60 sec coupling
Incorporation	bkg-corr. median	norm. to 0	bkg-corr. median	norm. to 0			bkg-corr. median	norm. to 0	bkg-corr. median	norm. to 0			bkg-corr. median	norm. to 0	bkg-corr. median	norm. to 0
0	15150.7	1	27189.8	1			15494	1	27472.4	1			15410.5	1	27356.2	1
1	15123.5	0.9982	27796.6	1.02232			14396.6	0.929173	26967.7	0.981629			15795.5	1.02499	27443.3	1.00319
2	14131.7	0.932741	27945.5	1.02779			13854.7	0.894202	26833.3	0.976736			15343.1	0.99563	27398.7	1.00155
3	13972.5	0.922234	27696.1	1.01862			13524.1	0.872866	27170.2	0.989001			15907.8	1.03227	27718.1	1.01323
4	14033.5	0.92626	28216.5	1.03776			13160.8	0.849415	26920.5	0.97991			15756.5	1.02246	27542.1	1.0068
5	13863.1	0.915009	28502	1.04826			12744.8	0.822568	27101.1	0.986486			16071.9	1.04292	27884.2	1.0193
6	13682	0.903059	27779.5	1.02169			11948.7	0.771186	26803.5	0.975651			16203.9	1.05149	27534.4	1.00651
7	13727.8	0.906081	28228.5	1.0382			11295.8	0.729042	26656.5	0.9703			16088.1	1.04398	27834.8	1.01749
8	13659.4	0.90157	28056.4	1.03187			10680.8	0.689352	26216.5	0.954285			16158.6	1.04855	28198.4	1.03079
9	13704	0.904509	28595.6	1.0517			10138.9	0.654375	26019.4	0.947112			16267.7	1.05563	28961.2	1.05867
10	13490.1	0.890389	28677	1.0547			9716.04	0.627085	25680.2	0.934764			16034.7	1.04051	28778.8	1.052
11	13313.6	0.878744	28811	1.05962			9137.17	0.589724	25126.1	0.914596			16310.4	1.0584	28517.3	1.04244
12	12684.4	0.83721	28773.8	1.05826			8517.42	0.549725	24442.9	0.889726			16294	1.05734	29362.1	1.07333

## Sheet: PhotolysisEfficiency
UV exposure	NPPOC dU		NPPOC dU-Ser		NPPOC dU-Tyr
J/cm²	Median	Norm. to max. exposure	Median	Norm. to max. exposure	Median	Norm. to max. exposure
0	1442.88	0.063412	1395.66	0.0766716	1009.28	0.0680651
0.4956	7101.12	0.312082	5097.82	0.280053	3713.88	0.250461
0.9912	11116.9	0.488567	8137.28	0.447028	6174.4	0.416397
1.4868	13884.4	0.610197	10482.9	0.575884	7480.52	0.504481
1.9824	16616.3	0.730258	11951.3	0.656553	9513.44	0.641579
2.478	17218.1	0.756706	13357	0.733776	10003.1	0.6746
2.9736	18221.5	0.800802	14144.3	0.777028	11335.8	0.764481
3.4692	19098	0.839322	14829.5	0.814669	12066.5	0.813757
3.9648	19819.3	0.871022	14801.2	0.813115	12127.5	0.817871
4.4604	19613.8	0.86199	15952.1	0.876341	12974.8	0.875011
4.956	21014.4	0.923544	16281.1	0.894416	13564.2	0.914762
5.4516	21312.6	0.936649	16468.6	0.904714	13749.6	0.927264
5.9472	21443	0.942384	16922	0.929622	13980.3	0.942821
6.4428	21192.3	0.931365	17090.9	0.9389	13734.2	0.926227
6.9384	22335.9	0.981624	17007.7	0.93433	14495.1	0.977541
7.434	22252.6	0.977961	17540.4	0.963597	14442.9	0.974018
7.9296	21907	0.962774	17305.7	0.950704	13612.6	0.918024
8.4252	22956	1.00888	17950.1	0.9861	14768.7	0.99599
8.9208	21886.5	0.961874	18567.8	1.02004	14981.8	1.01036
9.4164	23044.5	1.01277	18622.6	1.02305	14565.1	0.982258
9.912	22057.8	0.969401	18704.9	1.02757	15150.1	1.02171
10.4076	22987.5	1.01026	17853.3	0.980783	14623.6	0.986207
10.9032	22351.6	0.982313	18264.3	1.00336	14808.1	0.998647
11.3988	22794.2	1.00176	18518.3	1.01732	14989.8	1.0109
11.8944	22760.8	1.0003	18661.4	1.02518	14664.9	0.98899
12.39	22531.6	0.990226	17818.3	0.978862	15230.5	1.02713
12.8856	23531.2	1.03416	18747.8	1.02992	15067	1.0161
13.3812	22754	1	18203.1	1	14828.2	1

## Sheet: Hybridization_1-18_dT
Hybridization with DNA probe																				Hybridization with RNA probe
1	2	3	4	5	6	7	8	9	10	11	12	13	14	15	16	17	18	nt		1	2	3	4	5	6	7	8	9	10	11	12	13	14	15	16	17	18	nt
56.2	68.68	72.36	115.88	119.68	135.4	526.68	459.16	1978.48	2894	4917.08	4546	7500.68	7689.48	9810.84	9987.24	11610.7	17301.7			89.2	91.52	79.36	161	154.52	371.4	280.64	388.84	547.8	505.08	614.8	494.6	549.52	882.08	651.16	428.52	535.6	448.28
62.28	62.88	82.4	101.2	154.64	174.96	510.2	1203.04	1245.68	1815.04	5619	6863.88	8278.48	8273.08	11082.3	10372.3	12414	16699.1			105.28	77.68	174.92	115.92	279.2	209.64	377.32	362	378.56	567.68	572.88	589.16	461.2	529.72	536.2	429.64	456.96	688.2
61.28	47.84	68.04	83.24	166.8	167.28	253.72	669.12	909.2	2121.88	5977	5176.28	8405.76	6534.56	10885	12407.6	12983.2	14875.1			84.48	112.28	154.2	163.56	200.28	230.92	633.64	358.92	484.72	503.76	529.44	683.76	566.6	728.88	518.72	375.88	547.2	528.36
49.96	47	90.52	102.04	145.56	183.8	459	604.84	1956.2	2725.68	4023.76	8023.84	6596.12	8558.16	12163.4	10819.1	11618.6	15201.8			82.84	74.76	128.2	111.08	277.04	506.68	315.6	560.36	456.2	494.48	702.48	564.44	746.4	481.64	449.48	591.4	556.92	447.96
57.96	62.56	86.36	83.96	255.44	309.24	298.68	730.04	1320.04	3314.32	4193.32	6532.6	8659	7543.76	7600.84	12206	14504.6	13959.5			105.84	117	188.76	117.12	157.92	430.08	309.6	341.8	629.8	408.96	683.08	703.08	615	560.48	548.8	367.04	378.84	500.92
62.24	57	50.08	84.4	125.68	189.56	276	812.52	1143.04	1895	3278.76	6252.08	7128.24	7993.36	10298.7	12716.6	15950.6	15594.2			131.08	88.16	96.16	116.44	264.32	312.36	293.68	362.2	474.92	554	513.12	578.92	582.44	563.44	466.88	583.56	648.92	496.32
52.4	57.08	65.76	87.84	151.64	196.92	244.96	1073.96	1430	2924.08	4059.6	4757.36	6923.52	10636.3	9785.84	13516.5	11967.7	17475.5			111.36	91.16	154.16	136.6	221.8	327.48	339.08	461.76	464.24	459.52	430.2	430	778	415.36	418.68	388.72	756.8	392.76
50.2	60	66.84	82.64	148.04	141.64	240.04	543.48	1748.84	3125.48	5277.4	8194.6	6638.4	7789.8	10528.2	13028.6	11642	16446.8			133.24	69.4	126.16	91.36	150.32	212	329.52	344.6	555.16	510.92	773.8	611.6	486.52	477.68	554.84	365.32	626.4	608.84
60.16	59.44	68.84	94.28	140.8	169.36	322.12	613.32	1313.76	3424.24	5031	6486.36	8701.8	6293.24	9292	10472.2	11623	15285.4			77.28	75.56	119.88	117.36	167.16	193.48	275.2	357.64	780.68	811.92	586.52	430.48	453	328.48	387.28	382.44	678.72	603.44
55.48	65.72	57.28	101.8	111.08	154.32	615.76	792.8	1480.32	2804.08	3166.08	6421.4	7371.12	8467.64	9347.2	13103.8	13802	14355			90.44	116.56	89.04	193.6	151.84	198.12	370.52	309.16	559.84	450.92	871.68	549.64	562.2	468.6	524.64	435	470.28	426.8
51.72	48.96	51.2	105.68	150.36	246.12	331.44	1479.72	2076.56	2362.44	3610.2	5296.12	7460	8114.84	10185.4	12789.4	13876.8	14105.5			95.8	121.92	90.68	232	189.56	295.64	259.2	672.92	639.92	739.96	911.04	584.36	539.6	547.12	410.6	504.96	621.48	437.16
51.12	66.12	83.6	92.64	140.04	158.32	237.4	300.36	2456.88	2289.6	4581.76	5416.8	6549.76	8487.96	11436.8	9613.6	13418.4	15286.3			81.88	82.2	237.8	119	124.84	192.16	245.04	413.36	414.96	922.24	504.92	595.2	740.84	616.68	457.8	653.36	464	419.84
61.64	49.4	63.28	75.64	134.6	147.28	283.16	435.96	1251.16	3581.08	4439.52	5586	6973.08	9834.56	9239.36	11306.6	11921.3	14293.2			113.68	66.8	121.96	123.04	126.92	314.4	359.24	584.32	495.12	592	463.64	524.56	711.84	609.04	396.96	391.04	397.8	472.96
56.24	50.76	72.96	109.08	130.72	191.12	227.44	977.56	1334.92	4186	4408.24	5785.44	8936.2	7325.28	10218.8	9595.72	11635.2	13695			116.68	89.56	147.04	122.24	149.48	175.24	227.64	526.4	434.96	677.72	490.96	566.4	584.04	428.68	390.4	471.48	543.8	487.76
61.64	54.36	56.04	120.68	127.8	192.12	288.88	695.84	731.8	2374.04	4841.28	7109.88	6298.28	7897.6	10839.3	9755.6	10966.4	15390.6			82.16	76.32	121.56	210.96	152.72	236.6	334	521.08	635.28	550.72	876.68	440.6	442.12	447.72	473.52	552.84	436.64	611.16
46.08	61.2	63.88	92.04	123.88	175	394.04	1056.32	1381.12	3072.08	5045.76	5163.36	6681.56	8633.64	7680.96	8074.52	10646.4	16296.8			71.44	92.2	90.96	130.08	273.84	331.72	464.48	388.24	710	651.36	511.44	883.4	525.6	425.8	569.04	666.6	416.2	416.68
51.36	42.08	58.68	85.12	134.4	178.88	297.64		1304.64	3713.92	4354.12	6525.32	5829.6	8122.8	9293.48	9611.72	13802.2	15546.1			97.4	76.64	80.44	135.68		287.88	310.32	584.64	553	628.16	485.96	543.88	551.16	505.52	782.08	364.84	545.48	417.24
20 min H2O wash @r.t.																				20 min H2O wash @r.t.
1	2	3	4	5	6	7	8	9	10	11	12	13	14	15	16	17	18	nt		1	2	3	4	5	6	7	8	9	10	11	12	13	14	15	16	17	18	nt
44.4	44	43.28	69	62	68.36	95.12	90.72	111.04	110.44	132.8	128.24	145.96	160.72	150.16	169.76	178.04	188.16			41.32	42.48	41.96	47.44	69	55.28	66.88	75.92	92.04	78.72	94.84	90.68	99.24	116.24	105.52	107.2	109.72	89.48
44.48	42.64	46.48	57.36	67.04	79.32	97.92	117.36	112.88	106.8	117.24	127.6	142.52	151.84	157.16	110.2	145.44	195.8			39.84	41.76	43.24	44.2	55.84	56.56	68	73.84	77.8	88.16	92.72	99.48	90	97.76	132.16	53.28	103.04	106.84
42.52	40.76	45	50.88	82.84	72.76	83.44	94.76	104.44	101.28	132.8	129.56	140.4	122.6	184.6	156.48	167.76	175.96			55.32	42.08	44.08	45.4	49.2	60.24	55.4	70.52	69.56	81.84	85.16	106.28	96.32	115.72	98.12	90.84	96.6	112.8
42.8	43	50.84	56.36	70.08	70.32	97.52	94.64	109.08	111.04	129.36	138.28	139.16	131.76	156.16	141.16	152.92	188.6			41.44	43.28	44.68	46.68	51.84	64.28	64.08	73.56	61.6	81.56	98.76	98.92	117.12	100.12	95.44	117.52	91.56	108.12
42.32	42.6	51.64	49.24	74.56	83.84	91	95	117.16	117.76	120.36	137	137.08	128.92	144.44	109.96	181.52	184.24			41.76	40.88	43.6	45.04	51.92	63.16	63.52	68.56	82.52	76.2	93.28	102	100.8	103.48	101.52	83.72	100.36	109.52
45.8	43.64	41.32	53.8	66.72	70.92	64.52	108.52	118.4	104.32	114.28	126.96	145.04	134.16	150.48	171.36	159.96	187.88			42.8	43.44	42.16	45.72	48.04	60.2	43.36	69.6	79.36	88.76	88.84	102.24	102.56	102.4	115.8	108.52	116.84	109.28
42.52	42.92	45.96	52.76	71.24	81.08	82.68	108.92	107.28	119.4	118	144.44	133.76	146.6	161.84	160.96	163.72	191.24			42.72	42.68	44.24	44.92	49.92	58.04	61.96	69.64	77.44	83.08	87.84	87.08	107.56	99.44	97.64	94.44	130.44	91.2
42.8	42.44	47	56.92	67.04	70.8	83.24	74.88	111.08	121.88	128.28	129.72	128.68	127.96	157.92	162.96	157.84	188.28			40.8	43.84	43.6	46.28	50.08	61.76	59.04	45.36	80.52	72.96	95.6	91.92	104.64	93.2	99.76	97.96	125.96	130.28
41.84	42.56	48.44	54.68	69.64	83.64	91.64	96.16	101.44	125.08	108.88	123.52	128.12	131.08	126.92	145.24	163.52	204.16			40.88	42.6	42.84	45.84	50.56	57.76	63.36	70.76	90.4	95.24	79.56	84.88	93.2	87.64	61.84	60	131.16	124.92
41	44.32	42.92	53.56	62.32	81.4	95.6	103.92	101	115.12	100.64	142.12	126.2	130.6	161.72	161.92	160.12	236.04			39.4	40.8	41.28	46.08	50.8	54.88	68.64	76.24	72.24	83.6	101.2	104.4	86.52	97.16	102.56	100	103.72	122.44
41.56	40.36	43.44	57.4	72.68	77.56	94.76	112.44	116.24	123.12	123.8	121.64	134.28	130.76	162.28	163.48	169.52	130.24			42.68	40.88	42.16	47.36	48.8	58.36	61.4	69.04	74.88	95.52	90.32	93.24	100.36	99.04	78.12	111.24	118	88.6
40.6	40.92	49.28	53.96	70.68	76.84	91.04	108.48	122.64	113.08	110.28	115.28	125.52	147.6	158.52	133.6	156.36	200.12			42.28	43.72	45	43.4	51.88	54.16	59.32	63.4	77.32	102.68	92.92	100.4	113.72	105.24	93.28	123.12	83.04	97.88
43.6	40.16	45.48	49.52	73.52	65.32	79.48	87.4	111.52	132.36	133.92	116.12	127.32	149.72	151.08	158.28	149.16	151.92			41.36	41.96	43.76	46.36	47.64	63.28	62.44	86.6	85	90.52	83.52	87.24	112	100.96	92.32	93.8	92.24	101.72
41.2	43.08	44.84	58.8	73.76	77.64	88.84	92.64	111.12	122.84	110.92	115.04	141.68	140.4	152.56	166.76	153.68	186.36			42.72	42.68	45.24	45.2	46.64	54.04	59.76	76.12	83.92	84.2	81.64	86.8	103.84	95.24	90.12	96.32	118.4	118.48
46.08	41.84	43.28	61.84	67.04	80.2	90.2	108.28	95.72	114	123.92	121.44	132.6	136.4	144.2	154.88	165.76	198.68			42.84	42.88	44.84	47.44	46.84	55	64.56	72.68	88.72	83.76	97.16	91.96	97.8	99.84	110.6	122.96	107.52	114.96
41.4	45.44	45.08	54.48	65.88	79.76	80.6	100.12	97.6	128.6	118.76	122.76	121.8	168.64	154.2	134.04	186.24	194.92			40.12	40.36	42.08	45.6	46	58.08	72.4	75.92	94.16	86.52	91.96	100.16	89.32	86.72	120.04	111.12	69.04	101.52
39.88	39.56	43.44	54.56	68.76	76.84	94.56	102.8	98.68	112.76	105.36	131.76	138.2	139.2	122.4	131.84	181.12	174.12			41.92	40.32	42	45.36	52.92	59.08	62	72.36	74.76	87.68	92.4	97.56	102.88	88.2	121.6	89.28	106.2	103.4
60 min H2O wash @60°C
1	2	3	4	5	6	7	8	9	10	11	12	13	14	15	16	17	18	nt
45	41.96	41.12	50.44	50	57.12	58	62.28	66.08	67.48	67.52	66.32	67.32	66.04	66.8	68.88	77.04	69.84
44.2	41.68	47.84	46.68	53.68	56.6	57.44	65	60.48	67.36	65.84	69.12	68.96	70.44	67.36	68.52	66.36	80.04
48.56	49.56	47.12	45.2	52.36	57.68	61.08	58.96	61.56	61.2	65.16	67.56	67.32	71.48	68.48	66.56	75.12	76.32
42.4	41.72	43.56	47.12	49.12	56.88	57.96	64.52	63.08	60.64	73.48	62.44	69.72	67.44	65.56	72.76	73	77.2
42.76	45.16	53.4	45.68	55.28	59.2	60.76	63.04	69.64	67.28	70.28	72.24	68.32	67.84	75.88	62.6	73.04	82.24
48.76	46.08	44.28	47.12	48.08	57	56.48	58.4	62.72	63.6	69.04	68.28	70.12	71.12	68.36	75.56	76.12	69.28
47.08	42.64	46.44	46.04	56	56.04	57.44	64.08	61.64	62.08	60.76	66.64	61.4	62.68	66.68	73	71.32	77.16
46.24	41	46.24	44.88	54.28	54.36	58.28	58.88	61.44	62.44	66.24	67.56	74.56	70.4	70.36	69.76	79.4	73.8
46.52	43.64	47.2	49.6	51.2	57.12	56.16	55.44	62.12	68.92	61.8	63.92	62.6	69.8	65.88	70.08	70.6	79.4
41	41	48.8	44.96	49.36	56.16	58.4	62.48	64.28	66.96	63.08	72.6	66.16	57.12	74.36	65.84	68.76	77.12
46.12	52.16	44.88	47.44	51.92	54.92	55.56	63.12	60.8	67	69.8	68.88	71.08	69.16	66.2	69.6	77.2	73.32
45.08	42.44	50.92	45.52	49.6	54.76	58.84	58.56	63.56	67.68	62.56	67.48	71.64	67.6	72.92	75.6	73.56	76.12
47.28	45.04	48.08	47.96	47.8	58.76	56.72	57.56	62	64.2	61.76	60.52	65.28	66.08	67.48	68.08	68.88	70.64
45	44.56	47.92	48.84	49.2	50.36	58.36	59.2	64.52	64.64	62.92	66.44	68.12	64.6	64.6	71.44	75.16	80.32
47.76	44.4	49.8	51.24	48.16	53.84	59.24	63.52	64.56	64.88	65.08	62.84	63.92	76.04	66.56	70.64	73.72	80.12
47.2	45.36	44.28	49.16	49.12	58.52	55.92	59.68	68.28	64.84	64.56	65.16	64.44	68.8	73.36	68.2	73.64	76.4
43.52	43.56	49.92	46.36	48.56	53.6	61.68	63.84	62.76	61	62.84	66.08	69.4	65.64	70.64	67	72.6	75.84

## Sheet: Hybridization_1-18_dU
Hybridization with DNA probe																				Hybridization with RNA probe
1	2	3	4	5	6	7	8	9	10	11	12	13	14	15	16	17	18	nt		1	2	3	4	5	6	7	8	9	10	11	12	13	14	15	16	17	18	nt
50.12	61.84	62.32	67.16	75.96	82.28	128.4	143.92	155.68	496.56	588.96	2003.76	319.24	226.44	259.68	339.72	526.32	611.64			68.92	147.28	118.84	275.48	149.96	223.88	169.16	131.16	143.76	140.28	194.6	168.48	158.48	226.6	184.12	163.88	197.16	162.08
48.6	56.88	57.12	62.28	66.4	96.6	114.4	145.6	242.96	337.24	975.16	837.48	335.56	202.96	419.4	376.84	504.36	582.84			69.64	156.16	133.16	140.12	182.72	170.64	134.36	152.32	188.8	190.2	176.8	167.08	147.28	175.96	179.08	184.92	208.36	228.44
49.32	63.2	63.64	56.04	60.16	97.4	99.4	136.88	128.2	222.96	696.52	1222.84	282.6	215.48	230.6	418.96	319.48	653.04			82.48	151.44	259.96	193.12	133.72	238.84	139.2	150.72	139.76	149.68	145.52	154.88	148.08	184.4	215.6	175.64	181.6	204
45.72	64.04	46.24	76.08	64.6	110.32	135.88	137.24	159.44	271.6	496.92	599.84	336.48	290.36	297.4	347	454.08	538.84			77.84	234.96	93.88	297.12	145.72	247.6	189.4	193.48	172.96	157.64	224.36	161.76	156.6	264.08	140.28	219.64	249.16	162.8
53.36	62.36	51.44	70.2	80.96	124.68	121.16	120.36	135.16	262.96	1423.92	1136.28	289.72	186.64	224.2	418.76	524.84	529.6			153.44	112.72	194.08	202.88	138.52	301.2	204.52	129.8	121.24	148.8	201.56	169.88	168.48	145.28	174.36	151.88	191.8	154.12
53.36	67.84	58.04	71.12	102.24	87.64	99.36	158.28	229.48	284.4	1067.72	717.68	213.56	246.04	269.96	323.48	445.2	675.92			67.92	206.88	208.08	197.6	182.08	231.96	171.6	168.2	194.72	162.44	177.32	122.56	148.56	160.8	150.8	185.56	150.88	252.36
47.28	50.76	84.32	74.6	78.24	78.4	108.44	116.16	139.52	362.48	1490.88	953.28	220.84	241.36	385.88	317.36	480.92	587.32			80.16	112.28	223.32	108.28	242.88	119.32	125.52	268.16	170.6	157.96	178.12	174.72	245.52	141.24	149.8	176.2	163.08	225.96
58.96	60.76	62.88	51.84	101.28	117.48	171.24	143.48	175.76	266	762.36	1636.72	555.32	262.96	260.56	338.6	554.44	430.32			81.24	85.52	149.28	132.08	123.4	315.92	262.48	149.96	161.68	164.72	137.28	184.32	219.32	208.88	188.08	216.72	192.16	217.64
52.72	53.48	57	66.8	60.48	78.64	113.52	113.24	117.4	167.72	556.88	1590.56	297.8	263.88	547.2	298.68	528.92	639.52			72.16	88.84	119.8	168.16	217.36	126.76	230.44	150.16	125.36	150.16	150.72	166.88	162.88	143.24	238.04	250.52	220.64	160
53.16	50.84	58.04	59.04	72.96	114.08	113.6	133.88	152.12	219.68	1150.32	962.36	221.08	311.28	263.48	348.16	470.68	581.4			116.6	82.32	219.36	207.64	126.48	215.12	172.8	200.56	190.4	146.4	154.96	190.24	146.2	162.56	168.6	142.8	159.52	206.44
60.32	42.84	64.84	52	77.96	90.56	112.76	111.56	146.08	206.44	1600.16	992	276.72	249.16	345.28	338.64	451.16	505.2			88.08	131.4	153.92	149.68	274.84	194.92	181.12	213.28	170.52	171.2	183	145.68	166.6	140.92	148.24	184.8	217.56	163.2
50.32	44.88	56.16	45.24	89.36	70.64	132.44	111.56	126	266.12	1188.16	1031.72	390.56	176.16	285.52	387.44	442.36	558.12			74.96	95.68	180.4	101.36	124.96	182.36	195.56	117.76	212.64	213.2	152.08	177.16	146.76	173.68	163.24	151.64	204.88	172.36
47.92	61.56	63.68	52.56	82.76	93.84	111.96	122.48	123.24	228.68	658.08	583.44	291.96	181.16	360	391	269.24	503.2			64.04	78.52	221.2	215.04	168.56	114.84	154.92	142.96	135.16	125.4	127.96	169.72	137.08	168.36	153.64	183.92	249.36	238.36
61.56	52.2	77.52	66.12	86.44	103.64	111.04	134.64	134.56	204.8	1327.32	1207.84	378.44	195	340.08	286.96	442.36	616.4			134.96	123.92	297.68	139.72	108.44	282.24	152.72	201.24	130.2	145.72	183.24	143.68	165.76	123.48	168.48	217.92	209.68	187.52
54	49.6	67.88	57.12	60.28	76.68	93.32	137.24	157.88	395.88	1124.84	981.32	239.36	255.8	357.24	316.16	730.52	903.52			82.92	87.76	231.6	129.44	105.68	98.28	165.96	242.48	145.68	138.08	142.36	179.12	146.36	179.32	193.36	206.56	216.52	232.76
49.64	56.4	49	53.12	65.52	90.2	80.68	141.16	130.76	158	1731.6	677.56	323.48	231.68	294	326.76	509.08	402.92			61.28		284.36	134.68	94.36	155.32	115.04	293.08	196.04	176.64	174.24	178.12	188.12	221.16	158.96	143.92	213.12	213.28
54.92	50.72	52.8	57.4	61.28	92.24	99.04	122.4	118.52		1069.44	278.2	304.56	252.92	633.96	396.8	416.72	448.16			92.04		341.4	393.48		151.16	133.64	118.92	178.44	156.52	170.76	179.36	205.88	163.44	160.24	183.88	194.88	154.88
20 min H2O wash @r.t.																				20 min H2O wash @r.t.
1	2	3	4	5	6	7	8	9	10	11	12	13	14	15	16	17	18	nt		1	2	3	4	5	6	7	8	9	10	11	12	13	14	15	16	17	18	nt
40.4	41.48	43.88	47	50.48	49.44	63.76	65.6	65.16	70.84	70.08	79.04	86.72	74.92	75.08	81.84	86.24	110.32			42.56	43.84	43.12	44.36	44.8	46.76	52.64	52.6	55.64	59	68.84	60.48	63.44	69.24	62.56	62.76	65.4	59.8
40.32	45.76	41.44	43.56	46.56	60.08	58.92	64.48	69.88	78.16	71.76	75.76	81.32	77.36	89	88.16	93.72	91.16			42.88	43.28	35.48	43.96	45.36	48.6	46.72	55.08	53.08	65.96	61.56	57.44	53.32	64.8	55.96	65.16	56.16	63.72
41.44	41.24	42.52	44.68	48.44	55.72	55.2	64.16	63.6	62.72	67.6	79.08	73.6	80.56	80.8	90.32	88.12	100.4			42.36	42.2	42.56	44.2	44.08	48.32	53.08	58.52	60.88	58.36	56.12	57.68	52.68	65.48	64.4	65.32	68.04	63.8
40.6	44.2	37.84	48.2	45.28	59.16	66.08	69.08	68.2	71.68	69.6	74.64	80.72	87.16	77.44	83.52	85.56	81.44			41.24	42	40.08	44.32	44.64	48.08	52.48	55.96	60.04	59.88	73.08	64.08	60.32	75.4	60	47.56	67.36	60.2
44.76	44.8	43.08	43.92	51.04	57.96	58.72	60.44	66.96	49.76	72.36	75.16	70.16	83.56	78.64	95.76	91.72	87.84			43.76	43.12	43.32	43.92	44.4	51.72	55.4	53.6	56.2	48.72	64.64	59.8	61.08	67.08	64.36	60.2	62.56	61.92
40.64	47	43.6	46.6	53.48	53.2	55.84	68.12	70.04	70.08	69.04	65.64	71.6	73.96	80.48	80.04	78.68	100.92			40.88	43.08	42.88	42.72	50.44	47.72	56.24	55.08	58.24	62.36	61.68	59.28	66.08	65.16	62.48	57.68	58.6	69.52
40.28	41.48	41.52	43.96	48.32	50.08	59.84	59.52	62.84	66.12	72.24	74.84	77.04	80.48	93.48	86.32	96.32	92.76			42.36	43.24	45	43.84	44.8	45.92	50.44	56.56	62.96	61.28	61.4	64.8	67.2	61.36	60.96	64.2	61.4	54.36
42.32	43.2	44.4	41.8	52.96	58	63.08	66.2	70.28	62.48	70.88	74.36	85.52	79.24	77.6	85.88	94.92	93.88			42.48	42.2	41.2	43.04	46.52	49.04	49.16	56.6	56.44	59.2	55.16	62.52	69.64	64.6	65.6	68.96	66.92	74.6
39.12	39.8	40.96	47.12	46.76	51.64	58.4	62.2	54.64	62.12	67.6	74.72	79.6	75.68	89.48	81.44	92.32	98.88			40.72	42.68	45.2	40.24	45.28	39.44	54.2	50.44	51.28	61.24	64.28	64	60.68	59.76	66.24	75	64.92	63.16
42.88	44.24	45.72	43.52	49.24	53.92	60.24	63.92	66.48	71.72	74.08	68.52	75.84	86.56	77.4	100.92	86.44	101.04			42.56	42.48	43.72	43.96	45.48	47.16	53.04	58.6	60.4	61.64	57.68	62.72	62.72	65.96	63.48	61.92	63.76	67.4
41.48	40.04	47.8	42.8	44.96	41.44	58.2	58.72	64.04	63.52	67.16	72.92	76.36	71.96	73.92	85.4	86.32	81.8			40.92	40.96	43.92	42.52	43.96	43.88	53.2	60.44	56.8	63.84	63.8	61.92	63.8	57.88	58.68	55.32	70.2	60.04
39.88	43.04	41.76	42.28	49.48	50.48	62.36	61.36	59.64	64.44	67.68	70.72	63.92	73.4	75.64	87.68	89.4	94.04			36.92	41.88	43.68	43.2	46.96	51.68	52.64	52.68	64.36	71.24	60.16	63.92	58.96	66.08	59.44	60.64	61.44	64.88
40.52	43.2	42.64	41.84	48.6	52.64	63.12	60.12	60.72	69	65.96	67.8	80.08	60.8	83.08	78	78.76	90.6			42.28	41.12	44.12	45.68	44.6	46.92	50	51.68	54.72	58.16	59.36	61.72	60.92	38.52	61.48	60.52	75.64	67.04
42.52	43.56	47.28	47.6	51.92	59.8	60.68	64.52	61.44	61.64	74.48	75.64	74.68	74.24	76.28	76.4	93.8	101.6			43.08	42.68	43.64	44.48	45.88	50.48	53.32	53.72	56.52	63.72	61.56	60.6	55.04	58.12	61.52	67.8	66.24	64.88
42.84	41.12	43	46.24	44.4	47.12	55.8	67.88	64.44	61.64	72.4	76.72	69.6	77.44	87.4	76.88	87.52	106.64			40.6	41.96	41.8	43.12	42.6	47.56	50.92	61.12	53.56	57.56	58.2	63.8	57.8	67.96	63.48	63.68	66.44	66.56
40.52	44.36	42.4	42.76	45.24	55	52.2	65.52	61.08	63.4	73.44	69.92	82.12	75.28	85.44	68.2	92	88.28			42.88	42.2	40.84	41.4	44.04	47.76	49.8	59.92	65.32	56.84	60.28	56.88	59.4	68.84	58.28	61.56	62.12	64.6
42.44	40.52	40.28	44.32	46.28	52.72	56.16	62.32	63.28	62.68	73.2	71.28	76.52	77.04	100.76	90.88	94.88	80.68			41.28	42.2	43.32	44.76	45.6	48.4	42.92	52.28	62.56	60.2	60.68	68.96	63.68	58.16	62.76	59.68	65.88	58.48
60 min H2O wash @60°C
1	2	3	4	5	6	7	8	9	10	11	12	13	14	15	16	17	18	nt
43.68	47.48	42.76	45.8	45.12	46.32	48.96	54.28	54.72	55.16	60	63.64	53.92	54.36	56.92	58.92	67.16	67.28
42.32	42.52	47.84	43.92	48.28	47.24	46.72	49.44	51.32	58.28	56.68	55.24	58.56	57.44	62.72	68.6	67.04	66.56
40.84	42.32	50.64	50.68	44.68	51.12	50.4	60.6	56.72	53.44	51.16	56.48	60.56	60.68	56.72	61.72	66.68	62.04
40.12	47.6	41.16	45.96	48.6	52.76	57.28	51.72	58.72	53.64	59.24	60	64.36	59.24	62.8	57.36	58.84	59.36
42.36	47.4	42.8	52.2	45.92	54.36	57.88	50.64	54.72	52.2	55.72	66.32	53.4	62.8	62.36	62	64.68	60.88
42.2	47.96	55.28	43.52	47.96	46.48	55.32	53.56	53.44	60.92	56.72	52.36	61.84	65.6	63.52	59.6	65.6	70.8
49.4	40.88	46.84	46.92	45.56	46.24	56.56	49.24	52.8	56.2	55.2	61.4	54.76	59.8	62.36	62.28	60.76	68.52
41.24	43.24	45.88	46.96	46.16	50.12	49.36	54.04	51.84	54.52	58.96	56.92	62	62.4	63.12	66.24	72.84	60.04
43.68	45.8	50.12	44.16	51.12	50.56	47.32	51.72	51.16	55.92	57.32	56.96	59	55.72	70.92	65.16	66.92	63.12
49.6	41.16	45.68	47.92	55.64	45.4	54.2	55.08	58.52	52.48	61.16	56.4	61.72	54.12	58.84	59.2	62.2	62.28
44.44	45.04	44.8	43.92	44.32	47.08	51.32	54.36	51.72	58.24	60.2	57.6	58.84	55.04	62.8	58.32	65	57.2
42.6	42.16	53.08	46.48	49.36	45	54.12	51.72	54.2	49.92	58.56	60.2	57.28	61.2	59	59.76	62.76	61.8
45.72	42.2	46	47.8	46.24	44.16	50.68	59.96	52.36	53.2	54.64	52.44	53.16	59.96	60.68	60.4	66.72	62.04
41.68	43.44	44.92	42.08	47.4	46.36	51	55.12	47.88	58.16	58.92	56.36	54.76	62.16	57.24	60.04	66.36	65.16
44.84	45.08	47	47.28	44.52	44.2	53.8	55.28	53.64	52.92	51.92	61.6	58.76	54.92	60.16	66.36	53.84	65.44
43.4	43.08	44.28	45.04	46	45.24	49.08	50.64	49.72	52.48	60.2	52.44	57.64	54.24	66.48	54.08	68.52	70.12
41.16	41.52	42.2	43.92	43.2	46.96	55.84	48.12	54	54.8	53.68	52.12	55.56	57.12	58.16	69.72	65.28	60.2

## Sheet: Hybridization_1-18_dU-Ser
Hybridization with DNA probe																				Hybridization with RNA probe
1	2	3	4	5	6	7	8	9	10	11	12	13	14	15	16	17	18	nt		1	2	3	4	5	6	7	8	9	10	11	12	13	14	15	16	17	18	nt
46.76	45.2	77.32	70.64	173.32	383.84	1006.6	2809.2	4750.56	8003.2	13896.8	16339.5	18665.8	17035.6	24399.5	20787.7	26252.9	27003.8			108.6	115.28	507.92	997.72	1896.44	3923.32	8844.04	11969.6	16005	24421	23092.8	24358	32375.9	34234.2	32847.2	37575	36642.2	35292.8
64.52	59.92	58.44	54.52	102.76	291.28	1397.52	1305.44	5199.6	11210.7	11664.9	16986.8	17937.8	22225.6	23800.9	22070.9	20161.9	25836.9			85.64	98.52	273.08	488.56	1747.36	3279.12	7826.08	12733.2	19500.6	21509.4	27465.4	28596.6	35008.2	31793.1	31085.8	36335.1	39101.9	37143.4
57.52	56.16	52.16	63.28	120.92	310.6	408	3281.16	5731.88	6788.64	11610.8	15475.6	16834.8	20799.1	22614.3	23998.4	25804	27832.6			139.04	102.8	145.64	707.28	1323.92	4398.96	7135.84	12101.1	15822.4	23204.5	26692.2	31861	30443	31847.4	29263.8	32810.1	37821.7	36303.7
50.2	50.56	72.04	53.48	83.2	344.6	1830.52	2928.28	5197.8	9390.4	12846.6	16379.2	20506.6	17729.9	18451.1	24103.6	21493.5	27613.1			89.24	87.92	363.4	690.56	1367.8	3665	9660.68	11441.3	19085.6	19008.5	22468.3	27969.5	27433.4	31597.4	36384	37458.2	37633.1	27661.9
55	62.96	49.28	99.68	93.68	596.96	570.32	2115.04	3806.2	9390.88	12689	13344	15118.9	21936.9	17301.1	20294.8	23785.8	26006.8			83.12	211.8	193.6	805.2	1888.28	4495.48	7514.44	13757.4	17373.4	21474.9	26820	29430.5	31916.7	31832.2	31718.1	30372.1	36165.2	36679.6
47.72	44.56	57.12	70.6	213.52	223.4	1642.8	3208.44	3429.88	9379.44	12053.3	13166.6	19228.7	16482.2	21025.6	23979.4	24587.6	26276.2			94.48	129.4	231.68	1119.72	1673.44	3372.92	7146.64	11489.6	20409.5	22116.6	24042.7	27627.5	31687.2	31082	31473.9	36539.6	35064.1	32460.1
44.72	54.12	54.04	51.8	102.52	279.8	1044.64	3099	5595.92	7358.04	14303.6	13525.4	18424.8	19283.6	16771.8	24681.7	23945.1	23300.3			75.76	149.84	155.8	423.44	1845.28	3872.08	7471.28	12822.3	20533.1	25508.9	25995.4	33135.1	26456	30054.4	28762.8	34307.6	36788.6	38280
44.84	49.28	80	111.92	81.4	487.8	1107.88	4036.04	4762.72	9359.8	13520	14391.7	17481	20224.6	20385.5	24034.2	20927.4	27878			74.84	99.6	470.24	737.84	1613.8	3535.48	9919.68	15110.8	18600.8	22144.4	26202.1	23014.4	33811	33634.2	36814	37210.3	36566.6	31844.4
46.04	57.24	52.08	54.44	126.32	371.84	940.88	2304.28	6593.8	7565.96	13800.5	16468.1	18597.6	20984.9	23170.4	23532.5	24417.9	24816.1			68.84	168.84	279.28	538.76	3400	6481.88	9407.04	12722.8	19724.8	25961.3	26930.2	28667.1	30274.6	35034.2	30393.4	40277.2	35481.5	31460.3
55.48	57.52	69.6	127.12	106.32	481.72	772.6	1988.2	5395.56	9590.92	11770.2	14777.7	20592.7	17616.6	20784.2	21895.1	25109.2	26433.6			94.04	86	208.48	706.4	2172.24	4667.68	6492.72	14703.1	17007	19986.5	23348	26303	27818.8	31056.3	34441.1	32515.3	39564.4	38394.8
48.92	49.48	50.76	75.32	86.36	840.68	533.8	2218.64	3694.08	9310.52	13396.2	13864.6	17495.5	19238.8	21208.3	23102.6	24558.4	25427.4			69.52	108.08	246.72	731.48	2195.24	3755.6	5798.24	10947.3	18705.9	17176.1	25459	29633.3	26320.6	28483.8	33773.7	35103.3	28807.3	32991.6
67.68	61.68	67.64	67.76	183.36	519.64	1511.92	1754.2	7619.4	9597.48	11261.8	14977.7	16483	20731.3	20492	24644.6	22918.4	23040.3			111.28	150.04	344.8	970.52	2480.16	3711.44	7354.24	12057.3	16754.1	20279	26638	27745.2	32673	33893.8	32131.8	31560.6	34599.3	34101.8
45.2	69.88	46.64	128.52	99.04	350.96	745.36	2612.24	5152.8	7407.6	11596.3	12878.4	17859.8	20028.5	23084.6	22606.9	26603.3	26532.8			74.24	224.04	197.36	1704.12	1960.56	4610.32	6422.84	11355.8	21665.5	21769.8	24433.4	29619.9	35543.4	30588.2	29711.2	36519.6	35234.6	34486.9
43.8	59	58.96	72.72	105.16	152	991.4	2798	2527.32	11796.2	11154.4	15393.1	17861.2	19784.4	22887.1	23750.4	25771.1	27753.6			61.2	125.36	272.64	732.56	1656.92	4050.44	6746.48	13235.7	21723.4	20520	24225.1	31560.6	25353.5	28407	37441	33405.5	39082.9	38117.5
48.92	57.64	55.32	88.4	142.48	441.52	1008.04	2817.36	4738.56	8556.92	12353.4	14958.2	18530.4	21827.2	24531.3	20844.6	21814.1	25981.1			76.76	120.96	157	1048.48	1692.96	5745.24	8255.68	11646.3	13533.8	18522.8	22298	26947.5	30948.3	31339.8	28982.2	35946.9	35808.5	33548.2
67.12	56.4	65.88	64.08	178.72		988.04	3333.04	7099.2	9774.64	9559	15143.7	18708.5	22184.4	19986.1	24740.2	25605.2	25234.2			98.32	98.44	364.24	787.12	1838.92	3378.16	8321.64	15574.4	14985.2	23455.8	28739.6	31956.2	31231.4	30817.4	31549.7	35132.4	32561.2	34786.8
44.88	50	47.92	65.36			605.04	2222.24	6768.48	6436.76	10014.7	13521.4	18244.6	17806.2	17894.4	22506.6	25248.8	27947.7			71.48	107.76	142.96	725.88	3376.52	5006.24	7681.84	12613.9	14221.4	24884.7	30228.7	26067.7	28804.3	31991.7	37964.9	24826.2	33259.1	31634.6
20 min H2O wash @r.t.																				20 min H2O wash @r.t.
1	2	3	4	5	6	7	8	9	10	11	12	13	14	15	16	17	18	nt		1	2	3	4	5	6	7	8	9	10	11	12	13	14	15	16	17	18	nt
41.56	40.92	46.32	45.68	51	57.88	67.44	80.92	99.48	166.12	648	783.4	302.96	623.64	356.72	214.6	189.36	163.56			41.12	41.44	46.32	48.16	54.04	68.2	85.52	101.8	93.72	141.12	166.32	201.36	180.88	217.96	199.76	209.32	181.6	172.04
42.8	42.84	43.44	43.56	48.8	59.2	89.48	72.52	118.6	168.8	123.24	191.24	471.08	291.36	171.64	262.08	186.64	210.52			43.6	41.52	46.24	45.64	55.88	63.6	87.76	111.32	130.48	137.4	157.88	151.28	215.24	184.96	177.68	225.32	208.64	203.64
44.04	43.12	41.44	41.76	48.08	59.64	60.16	93.04	106.96	159.64	203.12	277.04	468.72	129.32	191.64	165.84	163.68	218.72			42.56	41.56	44.6	45.92	51.72	72.84	91.2	93.68	123.16	138.84	156.48	95.08	190.96	168.28	181.04	192.88	200.16	170.48
41.92	41.24	44.16	41.16	46.52	57.44	131.24	73.68	341.88	350.4	212.6	332	422.12	359.36	260.2	272.72	153.72	180.56			42.2	43.24	44.48	47	52.72	63	87.68	75.76	125.08	130.68	145.8	189	180.68	187.6	221.28	197.64	188.72	185.2
40.44	45.12	40.6	45.48	47.72	62.48	62.68	138.92	118.6	241.16	129.24	158.56	202.08	237.44	255.8	105.4	191.24	195.64			41.16	45.28	43.6	46.52	53.48	68.8	82.4	108.92	113.68	145.16	145.4	163.96	203.8	186.88	183.16	99.6	209.52	211.8
41.04	40.76	44.16	43.2	52.12	52.8	107.92	118.68	118.84	101.44	137	110.68	128.2	162.84	171.04	169.56	292.2	208.56			42.64	40.76	43.32	48.64	52.84	65.32	82.32	60.2	120.68	129.76	130.68	145.4	167.44	176.44	186.04	200.68	174.36	195.04
40.6	46.88	42.68	41.92	49.12	58.48	99.24	116.12	378.84	103.56	280.04	319	420.44	194.04	184.16	207.04	148.52	183.16			41.68	44.52	42.88	46.2	58.2	65.96	89.08	103.2	130	126.28	153.48	177.68	184.96	200.68	230.88	196.56	184.92	184.68
42.4	40.44	46.56	48.56	47.04	64.76	92.68	187.04	110.04	128	176.36	252.4	360.32	181.68	386.56	250.88	173.64	221.72			41.2	41.36	44.16	48.72	54.2	70.76	95.84	120.8	124.6	134.48	152.12	167.96	176.36	167.48	223.48	191.04	178.88	175.6
40.48	42.68	42.28	41.84	58.04	67	65.6	77.44	98.88	258.64	152.68	201.16	523.48	550.16	224.64	453.32	230.48	200.4			44.04	41.36	44.44	43.88	61.28	74.52	89.8	92.88	115.2	151.84	146.12	162.92	183.8	188.76	185.4	242.92	201.2	208.12
42.04	40.88	41.4	49.32	51.8	70	61.16	106.8	117.8	384.92	147.16	117.16	379.48	280.6	155.76	219.48	224.96	166.08			44.8	44.08	45.64	48.4	55.16	74.96	67.04	117.76	128.08	136.28	151.88	212.24	171.32	163.28	189.56	217.36	221.08	196.68
39.6	42.12	40.76	44.92	48.44	57.44	61.32	98	76.08	239.68	575.52	522.72	213.8	195.88	173.64	167.4	691.68	228.64			41.96	42.2	45.2	50.2	55.52	68.36	80.32	106.68	106.92	132.92	129.08	206.16	198.96	172.44	206.48	201.96	236.52	233.68
43.6	52.52	42.92	45.32	46.56	65.44	67.92	93.92	281.36	172.2	133.16	608.76	1334.88	161	157.72	241.08	147.12	202.92			43.04	46.4	44.24	49.96	60.04	67.6	78.8	61.32	108.68	135.04	177.72	169.68	161.28	193.16	203.88	171.8	167.96	229.32
41.76	47.56	42.76	49.4	52	80.48	79.72	119.32	143.32	98.36	105.44	155.24	562.16	325.52	504.56	165.32	206.4	177.52			41.2	48.96	44.36	51.64	56.04	79.88	84.36	107.08	124.28	118.96	118.04	171.56	203.04	205.04	193.44	137.68	165.32	189
39.16	42.44	42.8	47.32	48.72	70.48	77.16	200.08	200.28	376.08	121.88	205.08	197.68	219.2	137.92	211.88	223.64	190.92			41.2	57.8	44.92	45.8	50.6	71.6	85.56	111.08	104.8	138.44	137.16	179.96	196.48	180.64	206.04	200.8	211.68	186.6
39.4	43.04	41.6	45.44	48.88	57.6	73.52	92.92	80.88	95.44		352.2	282.48	175.72	210.88	149.4	156.8	190.84			38.04	46.08	41.96	50.84	54	72.6	87.56	99.24	111.96	129.52	123.4	139.28	188.56	172.88	187.68	210.04	168.92	220.16
43.68	44.32	43.64	46.32	50.36	50.64	77.16	98.56	374.04	168.04			197.48	226.72		205.96	204.76	187.32			42.96	41.04	43.96	46.8	54	64.16	79	106.2	141.44	135.8	182.36	180.56	178.8	182.48	171.56	201.28	188.2	219
41.16	40.4	40.92	43.28	55.96	66.24	60.96	76.12	406.52	253.96				225.04		149.36	162.68	209.12			41.72	41.88	43.44	47.36	61.08	72.12	82.4	102.4	161.96	139.24	131	188.72	176.48	175.08	214.72	185.08	203.24	188.8
60 min H2O wash @60°C
1	2	3	4	5	6	7	8	9	10	11	12	13	14	15	16	17	18	nt
45.16	49.64	45.16	48.16	47.28	46.08	49.76	48.68	53.68	56.12	84.72	91.88	71.72	107.6	96.52	77.76	80.32	70.84
42.8	42.08	43.28	42.08	44.76	47.64	50.04	51.28	54.88	66.08	58.08	70.16	139.32	81.84	69.36	76.4	85.36	84.84
42.56	44.44	41.92	45.6	46.52	43.72	53.04	51.4	51.92	52.48	60.36	74.24	78.28	61.4	82.72	72.08	70.24	91.56
46.36	44.96	44.96	51.24	44.32	51.12	50.68	47.28	56.44	62.12	69.64	76.24	90.12	86.24	82.08	83	76.44	71.6
43.44	51.04	46.92	44.96	44.88	51.08	48.84	50.68	55.2	59.28	55.12	58.12	76.2	74.92	73.16	67.48	83.32	74.8
43.84	42.16	42.56	45.56	44.56	45	47.68	51.68	51.48	57	55.04	56.64	70.36	71.48	71.92	70.48	84.8	86.36
46.36	42.52	42.44	44.48	45.48	48.08	52.2	51.08	59.68	57.24	104.68	66.04	68.16	75.88	66.84	76.52	72.68	84.68
45	41	50.44	44.64	48.12	47.04	48.4	58	51.56	60	66.36	67.28	81.72	71.32	85.16	79.96	78.36	83.52
43.24	42.2	43.2	46.92	50.48	50.76	53.84	52.08	53.32	59.52	62.12	73.2	86.08	94.6	72.76	127.68	83.64	83.76
43.16	44.24	42.76	43.72	52.8	46.64	54.24	56.2	53.96	61.48	58.24	124.72	88.48	73.84	65.32	80.64	89.92	71.4
42.68	43.64	47.56	48.04	50.64	46.56	48	50.64	52.56	53.6	63.32	100.72	66.76	70.08	63.08	64.64	111.64	81.36
47.48	43.8	45.84	46.36	49.28	46.44	46.56	49.52	57.88	58.76	86.88	65.84	74.96	65.24	67.44	83.04	71.68	79.76
41.84	47.24	44.52	47.4	45.76	45.8	48.32	51.32	57.52	53.44	67.56	67.6	101.36	91.08	108.84	66.08	81.48	84.8
49.68	41.8	43.12	45.52	45.2	48.36	46.4	55.12	55.28	65.72	54.48	80.12	76.32	74.24	126.64	71.56	82.88	80.84
41	43.76	46.36	42.92	47.28	46.84	45.8	55.12	51.24	55.84	55.36	60.96	69.04	69.96	68.88	68.2	72.36	80.08
41.8	43.04	47.28	44.16	43.64	44.48	52.2	49.52	57.92	59.48	75.36	66.96	73.04	84.84	87.56	81.08	79.88	80.04
46.96	41.16	43.4	44.96	43.44	54.52	48.76	53.24	60.16	60.36	79	76.48	64.16	69.52		67.4	69.72	83.44

## Sheet: Hybridization_1-18_dU-Tyr
Hybridization with DNA probe																				Hybridization with RNA probe
1	2	3	4	5	6	7	8	9	10	11	12	13	14	15	16	17	18	nt		1	2	3	4	5	6	7	8	9	10	11	12	13	14	15	16	17	18	nt
93.28	363.6	8205.88	18221.2	17378.3	20769	23263.2	23883.4	23525.8	20772.3	26230.7	25416.8	26606.7	27216	28204.9	27459.9	28881.2	28808.8			194.64	688.88	2049.16	5392.2	8001.52	10638.7	13456.4	21626.6	16909.4	18245.3	23185.5	20459.3	20395.2	24209.2	22287.5	25163.2	31290.7	28680.6
55.68	1101.88	5579.6	15940.5	19452.5	18709.4	22438.8	25109.6	26070.3	21827.8	21470	26337.6	26171.8	25354.9	26732.5	29163	29153.8	29827.3			108.2	976.32	2546.88	5181.6	11070.1	11977.3	13310.1	17041.5	14719	17627.4	22805.6	17532.6	20125.7	20041.8	21658.8	19787.6	23660.5	23822.4
98.28	487.44	8841.56	17596.6	18662.2	19493.6	24781.5	24918.1	23517.9	25371.3	25245.4	27250.6	27562.8	26831.5	29204.6	29019.4	31075.9	28967.4			116.72	558.2	2825.24	7035.92	11577.8	10439.8	12614.1	15672.2	17342.6	19666	24002.6	19334.6	25108.8	21148.2	23608.2	25342.8	24815.6	23567.1
61.92	1180.2	6721.04	20416.5	20311.8	23233.5	21366.1	25495.3	24626.4	26963.7	27013.3	26383.8	24120	24361.7	27820.5	28995	25469.1	30399.8			185.56	996.56	2592.6	4722	10415.9	14355.4	13074.8	14568.1	17611.6	19773.3	23267.2	18440.1	22368.1	23118.4	23022.1	22876.6	24440.2	27400.1
57.2	743.08	7859.68	21475.5	22111.7	21915	23225.3	22794.1	20908.6	21788.1	23909.2	27052.7	26463.8	27654.8	27784.1	28747.7	25855.5	30363.2			80.4	1407.24	4323.72	6218.08	11550	12596.6	17640.4	16818	15502	16667.6	17314.1	22552.8	21068.8	22815.3	28558.6	29351	23313	30936.6
52.36	528.4	6276.88	15769.8	20646.7	22214.2	25319.1	22483.4	26178.1	20021.6	26932.6	23135.2	26870.6	25325	27109.1	29198.6	28980.2	29136.7			149.72	527.96	2046.84	6311.16	9091.76	12401.3	15250.7	17984.6	17331	16162	18694.2	21052.8	19937.2	19661.4	22152.8	26045.8	24442.6	27596.3
62.52	270.72	4873.36	18217	20650.5	22842.7	24752.2	25872.4	27236.8	25766.5	23882.9	23216.2	27122.4	27257.5	27966	30067.7	30352	28798.3			108.08	731.96	2529.68	4183.32	6234.76	9522.52	13047.2	15376.1	18432.7	19514.3	16717.7	24291	22517.8	18459.1	23021.4	23099.6	26347.6	22795.5
47.72	588.16	6619.6	19624	22042.7	21945.2	19193.9	23330	25535.2	25739.2	20960.8	27296.5	25405.9	26417.8	29348	27156.4	29823.9	30021			213.6	857.08	3125.76	9967.36	8218.92	11242.5	16797	15487.8	15867.5	22105	17821.6	20095.6	22261.4	20544.7	21351.6	24148.7	27043.7	30182.1
66.48	307.04	8357.88	16114.6	20294.4	22994	19169.4	22890.3	23461	23268.1	25576.7	25760.3	24755	28975.6	29254.6	29804.7	29554	29343			146.2	847.64	1860.84	4044.64	7800.64	11120.8	14202.9	19932.1	14161.8	17519.8	18950.1	23469.5	21977.5	24384.8	24583.4	26082.8	23179.7	27578.3
46.68	637.84	8447.16	15295.5	20839.2	22044.1	22945	26494.6	21126.4	24867.9	25076.3	26352.2	28392.8	24589	26871.5	28428.1	29473.6	29389.3			116	1503.68	2217.72	8493.6	10427	13585	12521.2	15612.7	17793.2	24589.1	18126.8	21237.4	21035	22214.6	25561.8	21855.4	29963.2	29055
86.24	719.72	6479.68	18655.7	17439.5	19686.2	19637.4	22603.3	23295.2	24970.9	26838.8	25753.1	25426.7	27870.8	27065.2	28076.2	29453.5	29586			87.24	963.88	3017.4	3620.32	10985.2	10482.6	11325.2	20965.7	18948.1	16746	17557.6	17984.4	24945.5	17594.4	22937.6	27433.2	27106.6	25723.6
47.88	665.24	4767.12	18888.8	21397.4	22903.4	21032	25297.9	22835	25747.8	25957.4	23831.8	27910.6	27781.9	27004.1	28167.9	28225	28519.4			82.2	957.04	982.32	8818.32	8384.88	15282.5	13366	15601.6	17675.1	20218	16727.2	23749.2	18831.6	22350.5	23315.4	23402.4	23177.1	26828.4
56.2	499.28	5795.4	19758.8	20362.7	23283.4	20002.9	22320.8	22716.7	22708.2	25999.4	28015.8	26329.1	24070.6	27284.6	29276.2	28333	28758.3			201	653.64	2207.2	3603.96	8403.88	10571.7	14046.4	19255.4	21313.2	15250.7	20372.5	26547.9	22861.7	23846.2	23749	22137.3	25374.4	26118.7
44.8	620.64	7484.04	14997.7	19094.3	19019.4	19483	22917.4	26788	24352	24280.6	26206.8	26434.1	27799.9	28015.6	28463.4	28473.8	30179.7			106.64	656.28	1988.8	6764.24	8553.28	10966.7	14974.6	15630	17926.6	17820.3	20190.2	20171.9	26567.3	26431.3	28066.3	23748.7	23163.7	24946.6
93	567.4	6981	21467.1	21633.5	22673.3	19975.2	24579	21336.7	25549.9	27730.4	22160	27537.1	26305.5	28366	30183.9	28752.6	28885.4				1441.4	3094.68	7612.64	7867.84	14339.2	15442.9	13797.9	16253.4	17820	19998.5	24509.6	20010.8	22629.4	21957.2	26758.2	26599	23098.1
74.6	377.2	5032.96	15995.2	22904.4	22024.6	25274.7	25641.2	22590.8	24027.6	24701.5	24494.5	26564.2	25557.4	28310.2	28593.8	29522.9	30091.2				961.88	1962.64	8618.44	6708.72	9077.56	13309.4	15762.4	17095.6	19508	16280.8	18159.9	26349	22737.5	22265.4	25150.4	25690.9	26939.1
49.84	251.56	6220.24	21353.7	19266	21847.1	23750.3	22675.6	25324.2	23078.6	24528.2	22414.2	27468.1	29098.6	27267.8	27200.5	29511	29641.5				317.76	1711.2	10696	6646.04	11659.3	12920.6	19255.8	12800.3	17745.4	17153.4	20265.9	19455.8	25514.3	23480.4	24449.6	28309.5	30558.6
20 min H2O wash @r.t.																				20 min H2O wash @r.t.
1	2	3	4	5	6	7	8	9	10	11	12	13	14	15	16	17	18	nt		1	2	3	4	5	6	7	8	9	10	11	12	13	14	15	16	17	18	nt
48.56	54.72	305.44	1960.84	4441.28	3739.8	5691.08	9854.88	7843.8	6129.64	8127.52	4565.8	11402.4	8461.72	6503.48	8913.2	8547.84	7489.52			44.12	46.68	56.84	90.2	122.32	139.04	179.64	282.12	206.8	200.96	239.16	153.72	245.56	204.48	168.88	222.28	210.4	182.08
41.2	92.68	343.28	3086.68	4757.16	5982.6	5284.76	5551.4	6636.52	7419.04	9937.8	7752.16	7460.04	9729.68	7645.72	7862.84	6370.64	5196.76			44.08	46.84	60.24	95.88	190.56	159.12	207.72	160	213.32	237.08	358.88	207.16	153.56	207.88	144.96	181.56	145.44	158.64
47.52	59.76	340.08	1231.8	3704.64	3453.84	6683.36	8877.36	7991.4	7712.6	9388.56	8436.32	8049.6	9011.28	8501.64	9693.28	6192.28	6650.68			44.36	45.88	62.88	113.6	158.48	124.56	188.28	205.24	199.6	220.64	309.08	218.52	224.6	220.24	181.84	217.12	159.8	159.6
43.6	95.04	379.04	4371.04	4690.08	2088.08	5050.72	6068.52	6670.84	5203.4	5274.72	9752.56	7987.04	3993.72	4858.92	5209.64	6816.76	4940.4			42.88	49.8	66.04	126.36	183.44	127.84	159.72	173.04	192.48	159.92	168.12	199.24	191.96	147.48	159.76	151	157.32	136.12
41.56	90.16	998.92	1225.08	3522.16	2924.32	5142	4081.88	6652.56	8932.76	7818.84	7524.52	5925.8	8879.16	9894.2	6104.52	9320.4	7774.16			43.12	51.24	89.6	85	145.6	141.96	216.96	159.56	214.8	224.24	223.8	218.68	195.16	184.12	266.24	185.64	278.32	217.08
41.76	70.76	390.36	2195.2	3063.56	4763.28	5290.16	3002.16	5966.68	6563.36	6020.24	7282.08	7643	14232	8665.76	5999	9439.92	7395.8			41.76	47.12	57.36	90.32	166.88	161.68	178.72	138.8	148.88	237.56	182.2	182.32	192.12	190.4	213.72	182.72	196.48	167.28
43.28	67.2	269.64	3049.56	4094.4	3873.12	7072.08	6545.2	5000.64	5484.32	8071.12	7067.92	7595.48	8451.96	9222.84	6344.36	6231.28	5683.2			42.76	50	66.24	111.72	122.44	140.76	194.68	152.6	158.16	162.08	230.08	283.12	214.28	240.12	249.2	153.36	176.56	170.16
37.52	61.64	244.52	756.08	1636.96	3478.16	7952.12	6864.4	8390.44	8016.68	10834.8	10113	9861.96	10822.5	7500.8	6416.84	3513.48	6728.72			42.64	43.28	61.48	85.84	97.2	126.6	230.92	207.72	254.08	267.08	136.64	184.92	325.2	161	188.28	139.68	152.64	174.72
41.96	58.72	369.12	1752.76	3873.36	3930.48	7168.56	7164.96	12281.9	9587.08	9435.2	8983.6	8326.24	3722.72	4966.72	9155.24	4696.96	6741.72			43.12	49.08	59.36	74.48	123.68	153.92	173.4	267.04	305.88	212.32	250.28	240.88	260.64	139.44	175.64	174.84	162.92	156.6
40.56	78.96	598.36	2264.88	3196.84	2975.32	4445.76	4046.16	6425.6	9030.32	8914.88	10155.7	6800.04	7374.32	9395.8	8165.48	7237.92	3245.16			42.32	54.44	73.32	154.44	125.88	136.96	136.76	167.8	156.76	309.24	248.04	265.68	200.56	177.76	198.76	178.48	190.44	138.8
44.72	70.04	385.56	3957.96	4546.08	4000.6	3917.36	7536.56	6985.6	10249.2	7052.24	7660.28	9061.52	5433.96	6318.72	8753.72	6718.64	5322.04			42.44	57.36	65.28	110.32	183.76	149.04	185.08	230.32	230.76	323.12	191	181.04	321.36	86	184.16	220.04	182.08	164.96
40.56	66.08	427.96	2316.84	2675.68	5506.28	5662.96	3781.96	4292.48	5782.68	7536.96	9038.8	9616.96	5884.96	6152.44	5735.28	9386.72	10522			41.36	48.4	73.48	117.28	124.44	172.64	224.36	154.36	151.04	161.32	218.4	330.6	214.24	149.8	282.84	199.76	193.12	234.08
39.68	77.04	665.68	1715.2	3368.36	5673.52	7100.04	7073.24	9686.44	4422.32	8802.92	10254.8	4939.36	8249.88	12809.5	4958.76	10861.4	7972.84			40.08	46.92	69.72	88.96	154.6	149.72	152.52	243.48	354.2	173.72	246.84	267.84	142.88	238.36	215.04	152.76	235.6	178.68
42.12	62.88	285.16	1367.92	1854.64	5617.68	4006.64	5687.56	6401.52	8268.76	7147.2	5649	8904.84	9295.76	11189.4	3900.92	9003.16	6855.88			42.12	46.68	60.52	95.68	110.56	198.68	133.52	176.36	221.04	190.84	200.52	147.68	226.36	207.08	137.12	142.44	179.84	161.72
41.28	72.56	475	2757.48	1962.84	6912.76	5332.68	7487.32	7152.12	7457.32	7067.36	8853.24	9392.68	6125.64	3994.24	6659.84	5142.04	6857.32			50.56	42.08	66.92	107.56	111.8	176.04	168.68	220.08	208.08	184.92	159.72	265.84	288.44	256.4	169.32	139.64	176.28	174.84
44.28	61.2	435.6	2657.72	2331.76	4579.16	5695.4	8592.32	6917.44	8358.56	8717.28	6236.36	9983.92	8344.2	6062.88	6172.56	6957.04	5154.32			43	48.64	61.12	129.44	104.64	180.56	257.44	208.36	180.44	206.48	206.36	231.52	199.08	174.44	248.88	164.28	138.6	144.4
42.08	57.6	251.36	1828.56	3022.16	2664.88	8397.12	6593.44	7658.36	7640.48	10215.2	5701.28	8710.76	8749.8	9434.4	6216.48	6780.92	7715.96			43	42.76	44.72	108.84	121.96	155.36		273.36	211.48	165.08	237.2	189.2				147.12	178.32	195.88
60 min H2O wash @60°C
1	2	3	4	5	6	7	8	9	10	11	12	13	14	15	16	17	18	nt
47.76	48.92	67.92	230.96	1072.72	1224.56	2559	2847.96	4538.76	4094.96	4128.04	2777.28	6853.08	5156.88	4834.92	5793.44	4922.28	4992
42.28	48.4	65.92	238.2	1024.08	1761.16	1809.64	2425.72	3115.72	3790.32	4462.36	4666.88	4147.4	6333.8	4874.48	4520	3842.04	3329.28
46.6	47.16	65.44	232.96	770.44	1639.92	2478.56	3973.4	4503.44	3976.88	4439.28	4807.44	4500.16	6000.72	5532.28	5674.6	3927.76	3793.48
49.88	51.8	64.08	178.64	921.2	808.16	2460.56	2790	3214.88	2721.76	3042.96	5804.76	6364.96	3355.68	3432.4	3264.76	4393.56	2690.96
42.2	47.44	87.32	297	718.12	942.84	2405.52	2263.04	4240.4	5824.12	3979.24	4438.84	3587.32	5404.52	5925.68	3670.96	5984.28	6221.44
44.52	48.96	65.88	321.04	660.32	1530.6	2204.6	1462.28	3221.12	3985.64	3122.56	5551	4177.68	7768.84	5651.08	3462.2	4126.96	4640.76
47.52	47.92	58.68	251.32	1064.88	1386.12	3398.64	3065.32	2468.8	2852.92	5018.12	5420.64	4243.56	5486.6	5827.48	4278.12	2381.12	3805.64
42.4	51.6	63.64	206.6	566	1119.76	3189.8	3005.2	3954.24	3995.52	5996	5281.2	5617.12	6076.28	4728.28	4232.12	3228.64	4013.76
42.72	46.08	67.6	376.56	889.64	1398.08	1923.52	3060.8	5673.2	5258.8	4853.96	4999.56	5310	2604.32	3173	5513.2	4617.52	4498.32
42.52	50.76	71.28		633.24	940.44	1619.8	1865.72	3375.04	4752.12	4475.12	5783.68	3892.44	4724.84	5055	4813.4	4281.6	2444.36
47.08	50.96	71		898.8	1211.48	2210.68	2687.76	2830.76	4969.08	4185.64	4684.04	6167.24	3499.92	5315.32	5536.36	6446.36	3391
43.68	48.92	63.04		796.64	1642.48	1620.8	1782.24	2196.52	3328.72	4648.04	4669.4	5668.4	4086.28	4120.64	3474.88	6026.28	6759.64
46.16	49.16	76		644.24	1817.32	2136.28	3558.96	3848.68	3814.04	4496.28	5156.24	2918.8	5124.52	6871.12	3267.16	3349.32	5326.4
43.96	48.08	70.68		487.32	1617.88	2435.64	2708.6	3027	4154.64	3883.16	3191.88	6367.52	5198.52	6764.92	2752.44	3910.56	4504.44
41.28	46.2	75.08		486.08	2054.36	3723.52	3358.96	4372.28	4574.88	4088.88	5479.12	5089.64	3894.24	2740.04	4321.2	4348.32	4570.92
44.52	47.24	62.32		682.64	1575.08		3544.36	3129	5249.16	4718.24	3496.84	4989.64	4771.88	4522.2	3757.24		3679.96
45.04	46.12	60.44		833.76	899.68		2644	3546.68	4839.48	5145.44	3702.6	5294.48	5253.52	5434.36	4180.4		5071.04

## Sheet: Hybridization_1-18_bkg
Hybridization with DNA probe			Hybridization with RNA probe
0	nt		0	nt
57.6			84.56
46.32			56.56
52.36			66.92
49.4			66.08
45.44			64.28
42.6			88.56
56.28			77.48
77.96			65.72
50.08			55.72
45.24			65
55.2			65.2
57.24			79
60.72			74.84
44.08			69.32
64.04			78.48
55.6			115.96
59.32			91.76
20 min H2O wash @r.t.			20 min H2O wash @r.t.
0	nt		0	nt
42.2			44.52
41.56			40
40.28			41.4
42.52			43.76
39.56			40.56
40.8			42.76
40.6			40.12
41.08			60.16
40.36			40.64
40.2			41.72
40.88			41.92
42.48			41.04
44.92			44.48
39.36			42.4
43.76			46.48
41.48			43.84
42.56			42.72
60 min H2O wash 60°C
0	nt
44.08
44.52
40.76
44.92
45.84
51.64
40.92
46.44
42.72
44.52
40.44
43.28
45.68
46.04
50.88
40.72
45.96

## Sheet: Hybridization_25mer
Hybridization with 25mer probe							Hybridization to dT
dT	dU-Ser	dU-Tyr	dU	bkg			1	2	3	4	5	6	7	8	9	10	11	12	13	14	15	16	17	18	nt
25	25	25	25	0	nt		40.81	36.27	39.3	40.28	45.16	60.76	34.86	45.76	37.11	39.05	41.85	42.96	40.25	40.13	40.02	40.57	41.25	40.74
23444.8	23322.2	24479.1	24745.6	56.67			41.04	33.47	39.79	36.44	55.52	56.56	36.26	39.4	37.11	42.69	38.78	38.83	36.25	40.74	41.8	39.9	39.35	40.93
20000.2	25870.4	20167.9	24253	42.31			38.92	39.45	38.44	56.4	52.59	43.95	35.55	40.82	39.44	42.3	43.03	40.67	38.98	41.29	51.78	43.37	41.93	36.72
27449.7	26075.7	27843.9	24531.3	42.26			43.12	41.13	34.69	41.42	38.92	39.38	35.64	36.73	42.73	39.68	49.4	45.7	46.7	39.91	36.21	38.88	40.97	47.21
26760.7	23138.3	21459	22069.5	42.66			37.02	39.03	39.27	41.8	38.23	39.17	41.72	37.96	36.7	37.74	39.75	38.8	41.03	40.31	42.22	38.66	39.6	42.75
28002.1	24525.3	22777.5	26298.8	39.77			40.07	40.45	40.17	57.33	40.55	39.52	39.93	38.33	40.83	39.81	40.12	42.91	39.93	40.98	36.54	41.42	37.31	36.53
25599.3	25346.5	24603.2	24964.7	37.55			37.27	37.52	35.48	41.12	39.74	39.77	38.09	43.54	38.52	38.99	35.42	43.6	49.72	34.91	43.96	37.52	40.31	38.79
25408.4	24826.6	27988.9	23160.7	44.54			34.85	37.89	39.24	40.46	38.26	42.21	41.06	40.21	37.86	41.79	44.45	39.22	38.38	39.5	41.1	39.77	44.69	49.35
23088.8	26167	22133.9	24780.2	49.55			39.23	44.96	37.74	39.02	40.93	37.95	40.43	36.23	41.45	39.92	39.69	39.13	36.69	61.88	39.41	40.72	40.56	36.65
22069.3	25453	25111.7	23130.4	41.45			42.27	34.61	42.68	39.5	41.74	39.12	37.03	40.04	42.48	39.29	44.66	46.7	38.25	50.6	38.91	36.74	38.31	41.33
24583.8	25073.4	23834.5	25470.4	39.93			36.26	66.37	41.93	36.77	36.29	40.82	50.75	43.53	38.04	42.34	36.98	40.13	39.34	41.47	43.09	46.01	47.24	40.36
22801.7	25622.4	24904.9	20809.5	38.14			38.15	56.07	39.7	40.26	41.79	45.15	39.6	44.45	39.11	37.08	37.81	38.4	43.02	36.82	40.5	41.93	39.07	43.02
26342.5	22142.8	24188.2	26021.7	42.23			40	42.83	38.23	48.99	67.83	43	39.74	39.34	62.98	38.45	50.49	42.04	41.05	38.19	38.79	41.64	42.66	41.62
24972.4	25734.6	24871.2	23294.9	38.43			39.79	41.5	38.19	42.38	37.74	37.31	40.25	37.94	42.19	40.75	43.97	40.97	45.21	44.96	43.31	40.12	39.8	43.3
26005.4	23136.1	23487	27082.9	46.36			46.14	40.58	40.17	36.8	43.64	38.89	37.42	39.81	38.49	36.28	39.6	38.02	36.95	38.69	35.53	41.06	36.66	37.93
26094	20095	25739.9	24582.4	64.91			70.24	38.79	43.74	36.87	41.31	56.4	43.96	35.12	38.56	40.38	38.04	43.77	40.69	41.35	57.08	40.59	41.95	40.85
23832.6	23768.5	25498.8	29143.6	38.91			38.02	40.26	38.29	39.09	46.23	38.33		36.93	38.84	42.56	38.46	37.96	42.32	37.81	39.09	41.7	36.21	42.31
25772	25228.9	22094.2	24194.6	36.46
							Hybridization to dU
							1	2	3	4	5	6	7	8	9	10	11	12	13	14	15	16	17	18	nt
							40.94	40.22	41.27	38.13	36.23	43.93	36.53	38.21	39.33	43.33	37.12	45.88	41.97	56.7	42.21	36.83	39.01	38.54
							46.55	37.02	45.11	37.18	39.25	42.07	42.56	36.28	40.92	38.19	41.43	45.46	41.32	48.6	41.19	41.36	42.72	40.02
							42.31	37.64	41.3	43.55	41.02	42.07	40.45	40.58	40.61	37.07	42.21	37.14	44.1	43.64	36.16	39.82	41.54	39.58
							46.84	37.06	43.21	39.8	39.31	41.86	39.63	40.55	40.32	39.47	37.26	39.53	39.06	39.66	38.64	40.12	39.03	45.42
							35.1	35.63	38.88	39.55	42.67	39.36	36.95	42.39	40.83	41.69	41.44	43.73	38.58	38.71	41.04	38.89	41.07	38.27
							48.45	39.11	41.49	43.73	36.64	38.65	39.27	38.12	43.71	66.55	78.23	42.06	38.85	41.74	42.83	37.25	39.32	38.87
							47.4	37.49	45.38	43.85	43.79	43.31	38.65	40.76	40.43	40.39	42.9	40.58	41.2	40.7	38.72	39.45	41.86	39.84
							37.56	38.89	46.26	38.83	34.33	38.48	38.83	42.73	43.19	42.82	39.31	39.31	44.31	40.63	40.12	37.45	44.56	39.31
							41.47	37.11	40.12	45.24	43.23	39.31	39.98	46.38	42.29	40.92	41.93	41.82	36.98	35.78	85.03	42.45	39.67	35.39
							34.03	39.86	76.86	47.2	68.64	37.5	40.5	39.5	39.43	39.16	38.69	41.45	42.09	36.02	46.98	46.5	48.52	38.37
							37.98	38.88	48.52	43.33	42.29	41.02	39.6	45.21	39.97	37.45	40.98	43.07	38.31	40.83	41.74	43.72	38.75	40.67
							44.16	41.83	39.17	38.51	51.57	38.75	42.15	44.79	41.74	39.68	38.94	41.09	73.16	40.99	42.26	37.99	40.34	38.83
							43.49	37.88	41.48	38.08	40.25	36.29	44.05	39.96	43.85	43.62	42.48	48.71	37.29	41.78	51.45	41.49	37.6	41.35
							37.5	37.67	34.73	35.13	37.36	40.81	42.17	44.43	48.07	44.29	42.29	38.33	39.89	44.34	36.14	39.21	39.89	44.29
							36.07	44.18	39.53	40.93	47.12	40.98	40.11	40.51	43.94	42.55	37.73	39.84	43.18	65.96	39.21	40.62	39.5	38.32
							50.74	42.4	38.18	44.85	43.4	42.51	44.31	39.12	36.64	43.45	41.06	46.54	38.61	39.15	39.79	41.83	40.3	41.36
							52.39	41.43	36.79	39.26	36.79	49.57	43.12		41.2	43.26	40.55	39.22	39.94	39.78	44.74	37.39	38.69	39.7
							Hybridization to dU-Ser
							1	2	3	4	5	6	7	8	9	10	11	12	13	14	15	16	17	18	nt
							39	37.51	39.88	39.69	36.86	36.84	37.41	36.49	37.69	37.32	36.31	41.64	38.6	38.29	39.72	39.26	37.33	36.76
							41.57	35.3	44.59	36.24	37.55	64.74	39.64	35.74	39.26	37.97	46.03	45.69	38.49	38.22	37.75	37.39	39.72	74.17
							36.79	40.45	34.51	44.17	38.36	49.21	36.82	38.95	37.11	37.91	41.59	40.64	37.68	35.92	42.69	35.21	41.12	44.42
							43.17	37.36	42.44	37.72	35.72	35.6	39.31	36.52	44	41.22	37.38	40.66	33.98	40.91	40.12	38.74	41.43	35.06
							35.75	40.34	37.2	38.01	36.12	38.78	39.5	35.4	42.02	40.01	43.69	39.53	39.76	39.55	38.53	41.1	38.37	36.62
							37.74	42.18	37.97	36.33	38.07	37.31	33.65	39.01	42.54	39.83	36.78	39.53	69.18	40.2	40.06	37.82	41.03	36.51
							38.29	42.69	42.04	38.76	36.73	38.68	37.86	36.32	38.01	38.02	38.68	38.33	40.64	38.83	43.19	39.54	42.65	37.83
							40.44	37.71	37.5	35.16	42.98	36.88	36.9	38.75	44.88	39.64	39.83	35.88	38.07	38.4	38.11	39.77	39.98	37.21
							38.56	38.55	36.92	45.29	37.73	35.43	36.69	38.52	38.75	36.33	39.98	39.01	39.6	47.34	35.36	38.35	37.3	37.26
							39.26	43.55	49.61	39.49	40.17	38.68	38.34	37.46	39.45	36.95	38.21	38.6	38.45	38.79	36.8	37.02	39.25	39.23
							45.91	39.8	37.01	51.83	39.93	38.03	34.98	37.95	41.12	35.75	38.77	39.57	44.55	38.21	37.87	36.3	43.15	41.15
							40.02	50.9	39.96	34.36	37.07	40.8	34.97	38.48	34.02	40.4	40.84	40.69	37.18	38.66	38.17	39.02	40.46	41.75
							40.24	38.47	43.11	35.63	37.95	48.32	36.55	38.64	38.4	35.88	37.88	37.88	38.78	36.73	43.67	41.47	41.37	38.36
							46.7	44.45	35.18	49.79	39.94	35.84	38.29	34.26	37.72	37.69	40.99	38.98	41.64	38.54	38.7	38.29	43.89	38.91
							43.16	45.33	41.12	47.88	42.73	34.48	38.92	38.5	35.79	38.21	37.5	38.4	41.7	39.21	35.95	39.18	38.61	38.85
							37	62.01	37.07	41.47	34.14	39.98	38.52	41.03	36.76	38.18	41.24	39.32	38.6	42.17	41.79	38.36	34.3	41.31
							52.35	38.52	45.58	42.25	34.9	38.03	40.5	43.98	47.51	39.26	34.95	37.02	37.03	38.12	39.81	36.38	41.15	35.17
							Hybridization to dU-Tyr
							1	2	3	4	5	6	7	8	9	10	11	12	13	14	15	16	17	18	nt
							39.1	41.3	37.78	40.89	40.48	38.54	38.62	37.65	38.53	37.71	37.25	38.46	39.55	40.21	35.31	38.44	35.17	37.84
							37.92	40.11	38.56	47.41	36.69	48.79	55.05	37.16	34.62	37.47	39.69	81.01	49.91	36.58	37.86	32.4	35.81	37.12
							36.44	38.76	37.08	36.03	40.35	36.17	36.74	37.02	38.37	38.15	35.97	36.98	36.5	37.04	37.46	57.34	35.01	36.79
							36.89	41.45	44.88	33.67	38.12	38.6	38.6	34.13	48.08	37.86	37.61	38.2	37.74	38.47	39.95	38.93	39.91	38.44
							45.42	36.63	36.21	37.54	37.2	38.35	39.24	40.42	38.83	37.68	35.6	39.54	36.21	35.14	38.02	39.44	35.17	35.72
							38.27	43.66	41.05	38.05	50.94	36.35	38.48	38.92	41.17	36.4	35.11	36.02	36.27	38.27	38.36	35.51	36.64	36.83
							36.79	36.26	36.44	44.23	37.55	39.47	35.41	41.09	37.08	39.7	36.21	39.89	37.88	41.56	36.99	38.4	67.6	34.69
							43.79	35.62	39.49	37.37	40.45	36.74	56.37	36.89	36.72	77.97	41.73	41.51	39.02	37.79	34.69	40.05	39.3	36.9
							36.04	37.92	34.93	40.8	39.36	36.54	41.99	36.4	43.4	39.82	37.07	36.56	33.41	36.89	46.18	37.07	35.48	36.8
							42.02	35.57	34.45	38.17	38.49	36.86	36.82	36.45	36.91	37.07	36.17	36.39	34.4	39.05	38.2	36.12	54.55	41.12
							39.99	36.5	41.74	44.95	46.17	37.87	37.33	36.5	50.17	38.98	35.69	40.59	38.56	35.14	39	39.06	35.6	35.02
							36.66	36.74	43.9	37.65	36.32	36.72	36.06	41.17	40.75	37.34	35.07	38.07	36	37.39	36.88	34.77	37.31	36.29
							42.83	43.85	56.36	34.11	51.9	39.8	44.58	37.01	41.79	37.52	51.54	36.34	38.25	37.5	37.35	39.57	38.7	36.84
							42.7	34.74	40.01	37.78	41.55	37.47	39.5	36.86	33.24	38.11	36.09	36.64	36.45	38.09	37.18	36.73	36.71	37.88
							60.1	34.11	39.08	36.38	35.55	36.56	37.86	36.73	37.39	37.57	37.22	37.94	36.54	59.67	37.18	37	36.32	35.4
							36.51	38.45	59.34	38.91	36.64	38.78	37.96	37.64	39.62	38.02	36.45	35.98	37.72	50.87	37.16	38.64	38.2	38.09
								71.73	41.61	35.97	35.65	38.91	38.37	37.54	35.45	39.83	38.93	39.31		36.5	36.49	39.22	35.59	38.31

## Sheet: St-2-1_Kd
Sequence	Bmax	Bmax_SD	Kd	Kd_SD	R2
St-2-1_UTSYTUT	1127.6	49.6406	31.8676	8.05255	0.96577
St-2-1_TTUSTTS	1034.22	44.3285	32.0789	7.88374	0.967805
St-2-1_STUSTTY	879.496	23.283	32.5155	4.92561	0.986328
St-2-1_STUSTUS	1272.65	64.0349	33.2374	9.53769	0.954208
St-2-1_STUYTUS	1055.26	66.5161	33.5883	12.0535	0.928184
St-2-1_TSUSTUY	1220.11	44.1328	33.6521	6.92831	0.975958
St-2-1_UTYSTSY	988.513	67.7051	34.2042	13.3006	0.91945
St-2-1_TTUSTUY	973.33	47.0432	34.279	9.40256	0.95755
St-2-1_TSUSTUU	1217.84	54.4314	34.4326	8.72788	0.964751
St-2-1_SUUSTUS	1215.3	52.881	34.4527	8.50102	0.964855
St-2-1_TUUSTUY	1244.44	51.4939	35.2813	8.24729	0.970155
St-2-1_UTUSTUS	1264.28	43.9996	35.3669	6.95048	0.978668
St-2-1_TUUSTTS	1039.89	54.9372	35.7654	10.6504	0.951097
St-2-1_STUYTUY	975.482	40.0049	35.767	8.26782	0.968763
St-2-1_YUUSTUS	1218.82	58.9015	35.8136	9.75383	0.957855
St-2-1_UTUSTUU	1243.32	46.1714	35.896	7.50915	0.976561
St-2-1_UTUSTUT	1246.99	45.8283	35.9185	7.43583	0.976489
St-2-1_STSYTUY	1094.62	65.1669	35.932	12.0485	0.937746
St-2-1_STUSTUT	1179.11	81.2984	36.0445	13.9902	0.917818
St-2-1_TUSYTUS	977.035	51.3259	36.098	10.6727	0.95133
St-2-1_UTUSTYT	1050.67	38.2252	36.105	7.39292	0.976843
St-2-1_UTUSTUY	1102.95	63.6283	36.2838	11.7706	0.9412
St-2-1_TSUSTUS	1277.05	79.6467	36.2906	12.7275	0.933549
St-2-1_SYUSTUY	1265.07	69.8556	36.3127	11.2739	0.948879
St-2-1_TSUSTTY	991.715	59.4421	36.5743	12.3117	0.938118
St-2-1_TUUSTUT	1206.09	55.2693	36.5856	9.41507	0.964448
St-2-1_USSYTTY	970.735	40.765	36.7009	8.65116	0.969455
St-2-1_USSSTUS	1293.6	70.1854	36.7618	11.1929	0.953334
St-2-1_TSUYTUY	1111.06	76.8481	36.9299	14.3218	0.919702
St-2-1_USUSTUY	985.081	51.9334	36.9726	10.927	0.950893
St-2-1_USYSTUS	1227.36	57.8761	37.0491	9.79101	0.963047
St-2-1_TUSYTUY	1211.33	48.3661	37.0634	8.29301	0.972938
St-2-1_TSUSTUT	1243.3	40.8258	37.1171	6.82831	0.981013
St-2-1_YTUSTUS	1224.55	61.9709	37.1401	10.5291	0.955251
St-2-1_YTUSTUT	1307.71	47.9693	37.1806	7.6389	0.976905
St-2-1_TUUSTTT	1144.25	41.2521	37.2503	7.51942	0.9781
St-2-1_USUYTUS	1185.67	33.6571	37.3824	5.93836	0.986111
St-2-1_SUUYTUY	1101.55	70.1679	37.4697	13.351	0.92979
St-2-1_TUSYTTT	954.925	44.9877	37.48	9.87688	0.962482
St-2-1_UTUYTTT	1054.96	45.11	37.5609	8.98082	0.969882
St-2-1_TTUSTUT	1060.66	26.2272	37.6037	5.1984	0.989283
St-2-1_STSSTTY	987.555	46.6193	37.6376	9.93169	0.962817
St-2-1_TTUSTTY	950.614	50.1809	37.6773	11.115	0.952853
St-2-1_TYUSTUS	1194.46	74.2107	37.7282	13.0964	0.934776
St-2-1_TTUYTTY	928.596	57.9709	37.9658	13.2286	0.936204
St-2-1_UUUSTUY	1017.26	53.138	38.0116	11.0804	0.953139
St-2-1_YSUSTUU	1429.71	73.0097	38.0211	10.8342	0.956557
St-2-1_TTSYTTU	855.879	32.1815	38.1793	8.0054	0.976256
St-2-1_TSSYTTS	950.508	48.0304	38.1914	10.761	0.955769
St-2-1_TTYSTUY	880.695	38.0515	38.2034	9.20326	0.967516
St-2-1_UTSYTTY	1089.85	42.633	38.2543	8.34204	0.974293
St-2-1_TSYSTTS	1032.58	56.4094	38.2668	11.6532	0.951351
St-2-1_TTUSTUS	1224.45	55.9305	38.3671	9.76495	0.96512
St-2-1_TUSYTUT	997.03	50.93	38.5815	10.9706	0.95494
St-2-1_TUSYTTU	996.752	45.3749	38.6955	9.80157	0.965814
St-2-1_UTYSTUY	1046.01	50.3666	38.7002	10.3681	0.960452
St-2-1_YSUSTUS	1419.31	55.8191	38.7045	8.4686	0.972889
St-2-1_TUYSTUS	1079.66	44.8715	38.7945	8.96701	0.970722
St-2-1_SUUSTUY	1270.19	76.1659	38.8411	12.9504	0.938525
St-2-1_TTSYTUU	1033.58	28.4505	38.904	5.95297	0.987428
St-2-1_YUYSTUY	1217.02	33.4927	38.9081	5.9522	0.986895
St-2-1_USUSTYS	1078.08	63.3841	38.9555	12.7286	0.940267
St-2-1_TSSYTUU	1022.91	81.8409	39.0555	17.3583	0.89862
St-2-1_UTUSTSU	980.203	45.1339	39.0778	9.99491	0.964839
St-2-1_TUYSTUY	1036.98	49.3042	39.1726	10.3414	0.961867
St-2-1_TTSYTTY	915.135	47.9384	39.2499	11.4124	0.953432
St-2-1_TSUSTYY	950.62	69.4952	39.3075	15.9449	0.911831
St-2-1_YSUYTUY	1192.32	55.7606	39.3171	10.2028	0.961999
St-2-1_YUYSTUS	1292.14	77.8261	39.3205	13.1414	0.94197
St-2-1_TUUSTTU	1048.53	40.2627	39.3765	8.38831	0.975656
St-2-1_UTYSTUU	1081.83	53.7428	39.4596	10.8707	0.959713
St-2-1_USUSTUS	1264.89	87.6297	39.5034	15.1734	0.922493
St-2-1_TSSYTUS	1143.93	57.2237	39.608	10.9807	0.958102
St-2-1_USSYTYS	947.647	45.0075	39.6183	10.4276	0.961973
St-2-1_SSUSTUT	1232.62	84.1536	39.6198	14.9895	0.924212
St-2-1_UUSYTTY	893.327	29.7087	39.6564	7.30744	0.981043
St-2-1_YSSYTUY	1124.65	51.2932	39.6586	10.022	0.964105
St-2-1_SUUSTUT	1111.52	69.0923	39.6699	13.6622	0.93446
St-2-1_SYUSTUS	1299.78	78.7283	39.6846	13.3165	0.939372
St-2-1_STYSTUU	1042.54	44.5898	39.6974	9.40643	0.968541
St-2-1_SUSYTTT	1065.14	44.1859	39.7519	9.13362	0.971387
St-2-1_TTYSTSS	983.331	61.6759	39.7651	13.8128	0.935883
St-2-1_SSUSTYY	1097.56	94.3528	39.7906	18.9422	0.880918
St-2-1_YUUYTTY	1162.44	64.1081	39.8045	12.1558	0.95091
St-2-1_TSSSTUS	1232.77	64.541	39.8579	11.5523	0.956356
St-2-1_UUSYTUT	1113.12	48.4571	39.8852	9.61142	0.968777
St-2-1_UTYSTUS	1283.29	78.141	39.9263	13.4554	0.941592
St-2-1_TYUSTUY	1106.62	41.1045	39.9524	8.21279	0.976135
St-2-1_UUSSTUU	1022.81	38.7111	40.0134	8.37871	0.976896
St-2-1_STYSTSY	990.853	49.7808	40.0677	11.1343	0.956427
St-2-1_STYSTSS	1217.76	84.0289	40.0753	15.2944	0.92234
St-2-1_STSYTUS	1090.34	31.6974	40.0923	6.44617	0.985226
St-2-1_USUSTYU	985.792	50.6527	40.1068	11.3963	0.956218
St-2-1_UTUYTUS	1094.33	52.5863	40.133	10.6643	0.961033
St-2-1_USYSTSU	910.214	40.798	40.1373	9.94808	0.966448
St-2-1_STSYTTU	931.005	58.329	40.1512	13.9085	0.93531
St-2-1_UTSSTST	1000.07	66.5244	40.1997	14.7828	0.930515
St-2-1_UTYSTUT	1109.42	48.0695	40.217	9.6323	0.968522
St-2-1_UTUYTUU	974.574	67.2898	40.3071	15.3777	0.924446
St-2-1_UTUYTYY	891.97	46.324	40.4287	11.5955	0.95559
St-2-1_UTUYTUY	990.676	64.7236	40.4638	14.5972	0.929169
St-2-1_TUUSTSS	991.08	59.7637	40.5108	13.4867	0.938831
St-2-1_UUUSTTY	1001.67	60.1014	40.5901	13.4414	0.942625
St-2-1_YUUSTTY	1109.3	39.4719	40.6179	7.97573	0.978739
St-2-1_SYUSTYS	1264.6	83.5991	40.6249	14.8196	0.926508
St-2-1_UTUSTTT	1061.04	32.5836	40.702	6.89528	0.984443
St-2-1_UTYSTSU	1063.27	47.8997	40.7028	10.1153	0.966637
St-2-1_TYUSTUU	1097.29	40.0673	40.7774	8.2111	0.977643
St-2-1_SUYSTUS	1155.97	52.6184	40.7817	10.2369	0.964649
St-2-1_UTYTTSY	794.671	26.1972	40.8061	7.41771	0.982036
St-2-1_UTSSTUS	1090.16	53.2463	40.8611	11.0023	0.960393
St-2-1_UUYSTTS	995.502	68.0951	40.8624	15.408	0.923756
St-2-1_UUSYTTT	897.314	52.2585	40.8634	13.1195	0.946005
St-2-1_USUSTUU	1194.85	49.0922	40.927	9.26738	0.972441
St-2-1_TTUSTYT	981.51	49.1821	40.9727	11.3131	0.958787
St-2-1_TTYSTUU	1080.28	53.8817	40.9955	11.266	0.959755
St-2-1_TTUYTUS	1016.64	36.3851	41.0121	8.0865	0.978145
St-2-1_UTYTTSS	894.442	43.7461	41.0433	11.058	0.961878
St-2-1_SUSYTUS	1135.29	71.6951	41.1034	14.2953	0.933561
St-2-1_YUSYTUY	1231.4	53.2503	41.1278	9.79369	0.968558
St-2-1_UYUSTUU	1110.8	41.1556	41.1534	8.39532	0.977383
St-2-1_TSUYTUS	1207.56	71.2466	41.1684	13.3728	0.943049
St-2-1_STUSTSS	1159.28	74.6616	41.2666	14.6266	0.930973
St-2-1_TUSSTSS	946.502	62.6899	41.297	15.0511	0.929127
St-2-1_TUUYTUT	1075.03	49.0379	41.3011	10.3669	0.965275
St-2-1_TSYSTUS	1190.1	55.6342	41.3118	10.6266	0.964048
St-2-1_SSUYTUY	1066.29	37.1188	41.3188	7.91408	0.979252
St-2-1_SYUSTUT	1330.71	65.0459	41.3811	11.1269	0.961032
St-2-1_YSUSTYS	1174.62	78.3471	41.4767	15.2112	0.925539
St-2-1_TSSYTUY	942.307	76.5203	41.503	18.5295	0.894012
St-2-1_USUSTTU	956.362	24.4922	41.5698	5.85159	0.989009
St-2-1_STUSTUY	1177.16	67.41	41.5712	13.0849	0.944533
St-2-1_TUUYTUS	1100.22	38.008	41.5812	7.89518	0.979699
St-2-1_SSUSTUU	1327.4	83.8045	41.592	14.4317	0.935779
St-2-1_YUUYTUS	1107.26	62.0818	41.6546	12.8326	0.946564
St-2-1_USUSTUT	1238.97	77.7291	41.7097	14.3745	0.936815
St-2-1_STYTYYS	1100.76	62.7804	41.7781	13.0859	0.948272
St-2-1_TTSYTUY	959.312	44.6041	41.794	10.6715	0.963633
St-2-1_TUUSTUU	1144.1	31.6382	41.8254	6.3508	0.987427
St-2-1_TTSYTSY	889.417	56.1681	41.8456	14.5087	0.934755
St-2-1_UTUSTSS	1106.24	45.2716	41.8635	9.40548	0.972361
St-2-1_UUYSTST	1077.24	55.9439	41.8893	11.9418	0.957787
St-2-1_UTSSTSY	921.602	51.5922	41.9257	12.8814	0.948686
St-2-1_TSSYTSS	986.373	52.5996	41.9261	12.2708	0.953617
St-2-1_YUYSTTY	1030.44	41.4895	41.9784	9.27475	0.973602
St-2-1_TTSYTSS	903.324	56.3704	42.0045	14.3814	0.935766
St-2-1_TSSYTYU	930.158	34.7473	42.0069	8.60995	0.976795
St-2-1_TSYSTUY	1219.79	56.3655	42.0218	10.6535	0.965715
St-2-1_TSSYTUT	1072.49	45.8781	42.0491	9.86748	0.96926
St-2-1_UUYSTUS	1147.87	63.3872	42.0584	12.7401	0.950767
St-2-1_TTSYTTT	918.334	31.8239	42.0656	7.9964	0.980125
St-2-1_TTUYTTU	898.534	43.7312	42.0751	11.2325	0.962917
St-2-1_YTUYTUS	1155.23	77.7061	42.0903	15.528	0.926468
St-2-1_SSYSTUS	1165.47	65.326	42.109	12.9444	0.948974
St-2-1_SUUSTTT	1094.94	65.8483	42.1376	13.8965	0.94093
St-2-1_SSUSTUY	1252.41	73.9224	42.1501	13.6421	0.941496
St-2-1_UTSYTUS	1124.73	50.0542	42.1618	10.2884	0.966771
St-2-1_UTSYTSY	901.131	40.0159	42.1715	10.2679	0.966233
St-2-1_UTYSTTS	1033.69	42.3376	42.209	9.47748	0.972769
St-2-1_SUUYTTU	966.198	39.3272	42.2096	9.4187	0.972476
St-2-1_UYUSTUS	1194.43	63.058	42.2963	12.2373	0.954184
St-2-1_UYSYTSS	1062.61	43.9884	42.3662	9.60866	0.972448
St-2-1_TYUSTTY	1086.32	46.3891	42.3822	9.91485	0.970405
St-2-1_SUUSTTY	1201.86	50.9636	42.457	9.85979	0.9706
St-2-1_UTUYTUT	1150.85	50.6629	42.4801	10.2408	0.96906
St-2-1_SYSYTSS	1107.9	64.6674	42.5272	13.5906	0.946092
St-2-1_SSUSTYU	1169.54	30.9955	42.5302	6.17115	0.988326
St-2-1_TUUSUUS	1100.8	41.806	42.5479	8.84644	0.977415
St-2-1_SYUSTYY	1329.89	86.1975	42.5602	15.1011	0.932198
St-2-1_TTSYTUT	980.881	48.8455	42.5825	11.6074	0.95881
St-2-1_TUYSTSY	974.535	49.7079	42.6368	11.9015	0.957419
St-2-1_TTSYTTS	952.208	57.0954	42.7359	14.0176	0.941855
St-2-1_YTSYTUT	1136.61	46.8522	42.7633	9.64211	0.972337
St-2-1_UYUSTYT	1182.48	63.1387	42.8115	12.5011	0.953834
St-2-1_STUSTUU	1102.29	69.8382	42.872	14.8511	0.934305
St-2-1_USSYTUY	1009.65	60.7698	42.9507	14.1296	0.941794
St-2-1_STUSTSY	1145.64	52.8601	42.9814	10.8383	0.964611
St-2-1_YUUSTUY	1346.37	75.2513	42.9851	13.1299	0.948687
St-2-1_TSSSTUY	1107.82	71.7327	43.0543	15.2312	0.934095
St-2-1_TTUYTUT	974.764	44.3783	43.0642	10.7113	0.965951
St-2-1_TTUSTTT	990.707	35.9456	43.1035	8.54273	0.979058
St-2-1_STYSTUS	1053.44	57.3769	43.1337	12.8314	0.950698
St-2-1_SYSYTTY	1092.74	42.4552	43.1375	9.15368	0.975755
St-2-1_TTSYTST	803.514	38.1462	43.1385	11.1848	0.96261
St-2-1_SYUSTUU	1247.01	66.7243	43.157	12.6109	0.953481
St-2-1_STSYTTY	994.221	70.4765	43.1936	16.7181	0.918562
St-2-1_TTSSTSU	811.245	47.2643	43.2001	13.7427	0.945931
St-2-1_TTUSTUU	1064.46	50.1427	43.2016	11.1118	0.964171
St-2-1_TSUSTYT	1095.25	66.6538	43.2056	14.3566	0.940417
St-2-1_USUYTUY	1022.73	36.9357	43.2209	8.52228	0.977934
St-2-1_UYSYTYS	1004.56	47.0579	43.2438	11.059	0.96401
St-2-1_USSYTUU	936.204	34.4829	43.246	8.69584	0.977045
St-2-1_TSYSTTT	949.402	44.6079	43.2934	11.1026	0.963797
St-2-1_SUUSTSS	1178.42	53.9409	43.3032	10.8188	0.965445
St-2-1_SUTSTUT	1141.86	64.2185	43.3069	13.2935	0.951222
St-2-1_TYSSTUU	1003.48	50.5684	43.3501	11.9211	0.960202
St-2-1_TSUSTYS	1268.73	71.8732	43.3652	13.4046	0.948149
St-2-1_UUUSTSS	997.475	82.3446	43.3839	19.5415	0.897512
St-2-1_TYYSTUU	1091.28	71.33	43.4162	15.4822	0.933651
St-2-1_SUUSTTS	1102.78	55.1439	43.4212	11.8447	0.958983
St-2-1_STSSTUU	1165.69	52.5808	43.4271	10.6864	0.96863
St-2-1_TUUSTUS	1349.93	48.2834	43.4828	8.48272	0.979442
St-2-1_YTSYTTY	1042.4	43.4723	43.5346	9.90001	0.971497
St-2-1_STYTTSU	837.117	40.2972	43.5653	11.4343	0.963128
St-2-1_TSYSTUU	1154.98	72.2301	43.5683	14.8558	0.939392
St-2-1_TTTSTUS	944.63	39.8588	43.5949	10.0282	0.97143
St-2-1_USSYTUT	1065.15	27.514	43.628	6.14303	0.989004
St-2-1_TSUYTUT	1253.84	64.249	43.6557	12.1926	0.958692
St-2-1_YSUSTUT	1326.27	71.896	43.6762	12.9035	0.950732
St-2-1_TUUYTUU	1109.78	36.092	43.6854	7.74259	0.983078
St-2-1_UTUYTTS	1146.89	35.0385	43.7385	7.28076	0.985202
St-2-1_STSYTSS	1049.36	76.9965	43.7637	17.494	0.911955
St-2-1_TUSYTTY	879.09	51.6649	43.7671	14.0129	0.943028
St-2-1_UTSYTSU	853.303	49.2377	43.7723	13.7601	0.945657
St-2-1_TSTSTUU	989.319	51.9869	43.7789	12.5326	0.957681
St-2-1_STSSTUT	1000.89	56.4946	43.8047	13.4683	0.947876
St-2-1_TTUYTTS	953.364	34.78	43.8335	8.70971	0.978273
St-2-1_TYSYTUY	1032.09	73.1327	43.8409	16.9193	0.92155
St-2-1_UTYSTSS	1089.66	40.9177	43.888	8.97416	0.976338
St-2-1_TUSYTUU	971.165	56.821	43.911	13.9882	0.944814
St-2-1_TUUSTSU	962.396	55.7951	43.9375	13.8683	0.947782
St-2-1_UTUSTTS	1180.77	44.5703	43.9386	9.02962	0.977472
St-2-1_UTSYTST	988.861	38.1447	43.9879	9.23613	0.975949
St-2-1_STSYTSY	1024.7	75.9298	44.0312	17.7561	0.911743
St-2-1_YUSYTTS	1098.59	43.1489	44.053	9.41559	0.975133
St-2-1_SUSYTUY	1086.48	81.8064	44.0578	18.0514	0.909035
St-2-1_UTSYTUU	943.904	50.281	44.0624	12.7721	0.954314
St-2-1_UUYSTUT	1120.31	53.7729	44.0857	11.5137	0.963694
St-2-1_TTSSTUT	1016.19	32.3654	44.1444	7.64846	0.983828
St-2-1_USYSTUY	1184.76	70.9667	44.1699	14.3913	0.944317
St-2-1_UUSYTTS	1047.04	36.8678	44.1712	8.45973	0.980148
St-2-1_SSSYTUU	1154.93	87.7678	44.186	18.2635	0.912301
St-2-1_TSSYTTT	985.792	41.8797	44.1991	10.212	0.970603
St-2-1_TUUYTTT	1081.92	57.161	44.2101	12.7029	0.956198
St-2-1_STYSTTY	1033.63	59.0142	44.211	13.7274	0.947332
St-2-1_UTUYTYS	899.015	39.7352	44.2302	10.631	0.967834
St-2-1_TYSYTUT	1018.39	60.3084	44.2437	14.2469	0.943596
St-2-1_TSUSTTT	1155.16	54.7987	44.2449	11.4129	0.964585
St-2-1_SYYSTUT	1182.5	74.1762	44.2533	15.0943	0.939123
St-2-1_SUUYTUS	1198.11	76.0136	44.3195	15.2849	0.935406
St-2-1_TTUYTYS	946.184	57.9275	44.3402	14.7559	0.942102
St-2-1_STUSTST	1050.36	60.8949	44.358	13.9778	0.944764
St-2-1_STSYTUT	1116.69	71.2963	44.3661	15.3952	0.935525
St-2-1_TSUYTTS	1103.5	50.572	44.3664	11.051	0.96643
St-2-1_SSUYTUS	1166.39	49.9718	44.4559	10.3483	0.969608
St-2-1_STYUTSS	916.642	54.7154	44.4833	14.4252	0.945365
St-2-1_UUYSTSS	918.24	46.1021	44.4856	12.1332	0.959113
St-2-1_SUYSTSS	1091.83	79.8922	44.4967	17.6867	0.914742
St-2-1_STSSTUS	1227.37	49.9994	44.5214	9.85137	0.973518
St-2-1_TYUSTUT	1361.8	64.5435	44.5258	11.4629	0.96494
St-2-1_UYUSTYY	1023.38	61.8278	44.5363	14.6139	0.939729
St-2-1_TTTYTUT	864.322	33.9001	44.5505	9.49036	0.976351
St-2-1_TUYSTUU	1135.55	57.7127	44.5548	12.2985	0.959114
St-2-1_YTSSTUS	1165.06	76.5313	44.6538	15.9247	0.933412
St-2-1_STSSTSS	1003.32	78.9272	44.6574	19.0716	0.901901
St-2-1_UTSYTTU	931.056	57.0982	44.6704	14.8717	0.941219
St-2-1_TYYSTUS	1056.48	71.5876	44.6824	16.4355	0.927169
St-2-1_SYUSTTT	1106.5	56.2619	44.6948	12.3358	0.959068
St-2-1_TTSSTUU	961.019	67.0233	44.7077	16.9236	0.926622
St-2-1_STYTYYY	1137.49	35.4846	44.7187	7.57162	0.984257
St-2-1_UTUSTYS	1059.13	65.466	44.7297	15.0052	0.938577
St-2-1_TTUYTST	897.808	43.0845	44.7319	11.6506	0.963815
St-2-1_TTSSTUY	1105.51	43.3815	44.766	9.53302	0.97576
St-2-1_STUSTTS	1122.59	60.7423	44.8704	13.1699	0.953513
St-2-1_SUYSTUY	1173.87	65.9001	44.8754	13.6648	0.948891
St-2-1_UUSSTUY	1073.38	40.1911	44.8869	9.11644	0.977958
St-2-1_YTUSTTS	1024.69	62.8343	44.8895	14.9305	0.938941
St-2-1_YYSYTUS	1201.9	57.5471	45.0009	11.6815	0.964255
St-2-1_STYSTSU	1002.77	43.5197	45.0301	10.5942	0.969395
St-2-1_YTUYTSS	1332.99	73.7966	45.0311	13.5149	0.953692
St-2-1_SSUYTTS	1104.39	60.221	45.0817	13.3234	0.952305
St-2-1_SUYSTST	1078.13	82.3811	45.1102	18.6802	0.909006
St-2-1_UUSYTUY	968.471	59.207	45.1256	14.9494	0.939926
St-2-1_YUSYTUU	1059.71	62.7565	45.2176	14.5059	0.944658
St-2-1_YTUSTUY	1269.85	61.699	45.2758	11.914	0.961782
St-2-1_UUUYTUS	1100.22	62.4857	45.2782	13.9269	0.94912
St-2-1_YYUYTUY	1156.47	67.7749	45.3138	14.3806	0.945946
St-2-1_STYSTUY	1121.44	41.525	45.3851	9.09801	0.977344
St-2-1_STYTYUU	1205.78	57.9453	45.3957	11.8098	0.964917
St-2-1_UTYSTTY	980.106	40.7053	45.4006	10.2072	0.972568
St-2-1_SYYSTYY	1001.11	65.4662	45.4013	16.0719	0.932521
St-2-1_STSYTUU	987.018	57.0634	45.4086	14.2111	0.945902
St-2-1_UTSYTSS	1056.04	69.8718	45.4316	16.2703	0.931554
St-2-1_UUUSTTS	1070.1	40.8293	45.4331	9.38288	0.977289
St-2-1_UTSSTSU	903.188	44.4145	45.4401	12.0944	0.961447
St-2-1_USSSTTS	994.941	50.6259	45.4562	12.5184	0.960253
St-2-1_TUUSTYY	1016.7	51.2141	45.4648	12.3947	0.960234
St-2-1_SYSYTYT	1013.59	42.1712	45.4777	10.2399	0.971011
St-2-1_UUUYTUY	950.537	63.6972	45.4892	16.4959	0.929318
St-2-1_YSUYTUS	1284.73	70.8635	45.4907	13.5782	0.950961
St-2-1_STUSTYY	1012.8	79.5774	45.4987	19.344	0.901015
St-2-1_STUSTTT	1148.89	62.6864	45.5217	13.4394	0.953301
St-2-1_TUYSTST	1026.22	63.1984	45.5276	15.1704	0.940729
St-2-1_TYUYTUU	1141.8	62.4271	45.5408	13.4717	0.954065
St-2-1_TTSSTSS	973.354	48.303	45.5604	12.232	0.961677
St-2-1_UUUYTUT	1024.27	48.0611	45.5703	11.5676	0.965434
St-2-1_UYUYTUY	1024.98	51.6315	45.5707	12.4183	0.959097
St-2-1_USYSTTY	938.38	47.3959	45.6003	12.4584	0.959319
St-2-1_USUSTTT	1164.63	52.1291	45.6315	11.0471	0.969436
St-2-1_TSYSTYY	906.517	41.4176	45.6407	11.278	0.966889
St-2-1_TTUSTYU	949.23	43.8194	45.714	11.4102	0.966788
St-2-1_STYSTUT	1258.81	82.6071	45.7182	16.2208	0.934778
St-2-1_UUUYTUU	959.589	51.898	45.7217	13.3694	0.955677
St-2-1_YTUYTUT	1255.73	39.1511	45.7413	7.70994	0.984784
St-2-1_UUYSTTU	930.078	53.0952	45.7453	14.1177	0.9509
St-2-1_TTYSTUT	1134.8	52.3898	45.7493	11.4184	0.966789
St-2-1_UUSYTUU	1008.89	47.1448	45.8203	11.5724	0.966013
St-2-1_UTSYTTS	1064.33	56.4492	45.8576	13.1432	0.955803
St-2-1_UYUSTUT	1208.03	46.3423	45.8682	9.50838	0.976729
St-2-1_USTSTYS	851.416	65.3153	45.8727	19.0156	0.910751
St-2-1_TUUYTUY	1128.29	45.4191	45.8915	9.98152	0.974043
St-2-1_UTSYTYS	953.623	35.202	45.9505	9.16304	0.978225
St-2-1_UYUYTTY	933.125	48.4161	45.972	12.8845	0.958257
St-2-1_UUSYTTU	1061.79	34.8404	46.0408	8.15805	0.983563
St-2-1_USUSTSS	1121.82	60.8822	46.0527	13.4964	0.95509
St-2-1_SSSYTUS	1094.73	61.088	46.073	13.8814	0.949642
St-2-1_TTTSTTS	956.559	52.7304	46.0805	13.7162	0.955654
St-2-1_YSUSTUY	1450.96	82.8942	46.0861	14.2157	0.948196
St-2-1_YTUSTST	1098.87	66.9193	46.1209	15.1623	0.94137
St-2-1_TSYSTYT	944.943	45.6598	46.1902	12.046	0.963576
St-2-1_UTSYTUY	1038.29	50.8369	46.2196	12.2123	0.961583
St-2-1_TUSSTTS	993.722	50.7745	46.2348	12.748	0.959356
St-2-1_TYSYTTS	1032.94	59.4688	46.2687	14.3727	0.948792
St-2-1_UTSSTUU	1050.08	56.5684	46.2692	13.4486	0.955141
St-2-1_YTUSTTY	1094.87	56.9287	46.2746	12.9815	0.957007
St-2-1_STYTTSY	992.984	61.9465	46.3094	15.5853	0.940482
St-2-1_SYSYTUS	1213.72	78.7323	46.3195	16.2087	0.935033
St-2-1_TUSSTUU	1097.59	38.8188	46.3197	8.83741	0.980831
St-2-1_UYYSTYU	955.593	46.5679	46.3377	12.1807	0.963207
St-2-1_TTSSTUS	1335.84	72.0875	46.3582	13.4936	0.957267
St-2-1_STUYTUU	1073.67	64.4911	46.3656	15.0208	0.943383
St-2-1_SUTYTTS	911.558	61.6529	46.3784	16.9177	0.92999
St-2-1_SSSYTTS	1034.05	44.8831	46.3792	10.857	0.969491
St-2-1_TUTYTUS	1232.91	81.555	46.4253	16.5597	0.938075
St-2-1_TTSSTST	1016.92	45.5269	46.4425	11.2112	0.969367
St-2-1_YTSYTUS	1132.46	78.5423	46.4623	17.3737	0.923573
St-2-1_UTYTTST	820.219	30.568	46.4864	9.33987	0.978096
St-2-1_SSSYTUY	1198.4	70.3679	46.487	14.7156	0.945907
St-2-1_TSUYTYT	976.391	43.5645	46.5278	11.1899	0.968157
St-2-1_TYSSTUT	1163.92	46.9598	46.5541	10.1236	0.975116
St-2-1_UUYSTTY	960.274	64.142	46.566	16.7631	0.933233
St-2-1_USSYTSU	980.036	38.512	46.5726	9.86341	0.976712
St-2-1_YSSSTYU	985.231	83.7952	46.5857	21.3519	0.895223
St-2-1_SYUYTUY	1015.87	62.8956	46.5928	15.5452	0.93913
St-2-1_UYUSTUY	1131.42	56.0379	46.5976	12.4366	0.960731
St-2-1_SUSSTTT	1152.66	55.6568	46.6309	12.1322	0.965339
St-2-1_UUSSTSY	938.821	31.9619	46.634	8.55451	0.98193
St-2-1_UUSSTSS	983.665	40.4836	46.6707	10.348	0.973495
St-2-1_UUUSTTU	944.304	34.1072	46.7132	9.08839	0.979837
St-2-1_UTUSUSS	981.119	48.5903	46.725	12.4645	0.964184
St-2-1_YTYSTSU	1006.74	36.2677	46.7553	9.07127	0.97916
St-2-1_UUUSTUS	1173.98	58.6427	46.772	12.5821	0.960786
St-2-1_YTYSTSS	1052.76	65.9621	46.7967	15.7887	0.937526
St-2-1_TSUSTTS	1062.6	64.0394	46.8119	15.1906	0.942995
St-2-1_SUSYTTY	957.818	58.0283	46.8206	15.2728	0.940993
St-2-1_YYUSTUT	1418.68	98.3597	46.8571	17.4897	0.927934
St-2-1_YSUYTYU	1201.04	52.6647	46.8615	11.0622	0.969574
St-2-1_USSYTTU	866.604	35.9173	46.8841	10.46	0.972596
St-2-1_TYSSTUS	1136.55	83.1629	46.9004	18.472	0.921258
St-2-1_YTSYTTS	1077.02	45.3275	46.9249	10.6294	0.972155
St-2-1_YYUSTYY	1255.15	83.3061	46.9331	16.7651	0.929504
St-2-1_STUYTSS	1012.46	63.6365	46.9732	15.8872	0.936562
St-2-1_TTUYTUU	1038.34	26.2528	47.0451	6.39919	0.989957
St-2-1_TSSSTTY	898.918	48.1936	47.0695	13.5749	0.954854
St-2-1_UYUSTYU	1124.02	56.0184	47.0716	12.6194	0.960963
St-2-1_UUYSTUU	1065.19	61.3121	47.0757	14.5761	0.950164
St-2-1_UTSSTTU	1018.66	42.6233	47.0934	10.5993	0.973962
St-2-1_TUSSTSU	824.148	35.0542	47.1114	10.7775	0.971432
St-2-1_TSYSTSS	966.913	52.824	47.1197	13.8453	0.954069
St-2-1_TUUSTYS	935.873	57.7005	47.1468	15.6321	0.94095
St-2-1_UTTSTUY	1006.24	32.4395	47.2009	8.18173	0.983819
St-2-1_TYYSTUY	1040.36	87.3878	47.2064	21.3211	0.892271
St-2-1_TSTYTUT	892.671	50.1288	47.2341	14.2599	0.950648
St-2-1_UTUYTTY	976.986	61.6257	47.2357	16.018	0.938414
St-2-1_TYSYTUU	1010.5	72.5237	47.2492	18.2287	0.921781
St-2-1_TSUYTUU	1070.23	60.9781	47.2597	14.4747	0.94988
St-2-1_YSUYTYY	1289.94	80.1065	47.2749	15.78	0.941281
St-2-1_TTYSTSU	825.164	47.6891	47.2751	14.6861	0.94725
St-2-1_SUYSTUT	1158.13	66.4994	47.2982	14.5968	0.947934
St-2-1_TTYTTST	781.572	49.1424	47.3247	15.9918	0.940124
St-2-1_SYUSTYU	1087.28	64.9436	47.3295	15.1928	0.940813
St-2-1_UUUYTTT	991.556	48.8123	47.3713	12.5305	0.963818
St-2-1_SSSSTUY	1166.23	36.8226	47.3832	8.0386	0.984212
St-2-1_TYYSTUT	1122.34	82.8941	47.4291	18.819	0.917744
St-2-1_UUUSTUU	1186.03	29.6558	47.4696	6.37564	0.990438
St-2-1_YSSSTUS	1500.44	95.1661	47.533	16.1899	0.941443
St-2-1_STSYTTS	1051.86	57.3138	47.5608	13.9153	0.953137
St-2-1_YYUYTTT	1149.88	81.735	47.583	18.1602	0.927959
St-2-1_UUYSTSY	920.482	58.7285	47.5974	16.3042	0.936886
St-2-1_YUYSTSS	1110.4	91.3327	47.6052	21.0216	0.899046
St-2-1_TSUSTTU	1008.03	44.3405	47.6136	11.2437	0.969472
St-2-1_USYSTUT	1146.99	54.3485	47.6895	12.128	0.965335
St-2-1_TTUYTSU	845.974	41.4999	47.7258	12.5639	0.962803
St-2-1_TUSSTST	959.043	42.4611	47.7267	11.3395	0.969495
St-2-1_UUSSTTY	939.135	44.8094	47.729	12.2206	0.96593
St-2-1_TSYSTTU	967.27	56.6965	47.7448	15.0167	0.948128
St-2-1_TSSTTUU	859.404	59.1812	47.7486	17.6435	0.934828
St-2-1_YYUSTUS	1350.25	91.1633	47.7491	17.2987	0.929701
St-2-1_SYUYTTY	978.184	67.9644	47.7505	17.8024	0.926363
St-2-1_TSSYTYY	893.531	46.1009	47.7605	13.2218	0.956061
St-2-1_SSYSTTS	1096.55	63.2338	47.7749	14.7817	0.94997
St-2-1_UTYTTUY	857.482	43.7849	47.779	13.0895	0.960991
St-2-1_UUUYTTY	969.399	53.9794	47.7804	14.2743	0.953409
St-2-1_STSSTSU	951.687	67.5103	47.7942	18.1891	0.921307
St-2-1_TUSYTSY	861.686	60.7666	47.8076	18.0867	0.923551
St-2-1_UTSSTTS	987.023	55.753	47.8168	14.4889	0.951678
St-2-1_TTSYTSU	842.048	63.553	47.8204	19.3614	0.91289
St-2-1_TUYSTSS	985.788	42.8656	47.8229	11.1555	0.969495
St-2-1_SYSYTTU	893.244	62.3313	47.8391	17.9068	0.926065
St-2-1_UUTYTUS	929.341	63.0037	47.8449	17.3983	0.93345
St-2-1_SYYTYUU	1256.04	56.8378	47.8504	11.6148	0.970721
St-2-1_SYYSTSS	1124.33	44.895	47.8809	10.2541	0.974708
St-2-1_UUSSTUS	1134.39	42.3899	47.882	9.59642	0.978729
St-2-1_TUUYTTU	925.016	41.1193	47.9227	11.4234	0.968629
St-2-1_UYYSTTS	1016.2	68.127	47.9425	17.2335	0.933171
St-2-1_USYSTSS	1074.84	44.1927	47.9437	10.5699	0.973533
St-2-1_TTSSTTU	992.484	40.2265	47.9564	10.4219	0.975781
St-2-1_SUUSTTU	1081.7	62.3118	47.9847	14.8195	0.948631
St-2-1_YTUYTSY	991.457	59.0598	47.9923	15.3265	0.944154
St-2-1_YSSYTYY	1140.28	78.6115	47.9968	17.7391	0.926304
St-2-1_TSTSTUY	1133.72	53.8634	48.005	12.2264	0.966139
St-2-1_TTUSTST	1049.29	54.883	48.0126	13.4618	0.958781
St-2-1_TYUSTYU	1126.64	60.0595	48.0258	13.7238	0.956469
St-2-1_YSUSTYY	1194.95	64.138	48.0385	13.8207	0.953733
St-2-1_TSSYTTY	847.378	59.0412	48.0476	17.9438	0.924837
St-2-1_SSYSTUY	1153.23	64.8319	48.0482	14.4782	0.951072
St-2-1_UUSYTSS	983.636	43.4077	48.0508	11.3657	0.969969
St-2-1_SUSSTUU	1149.68	51.6849	48.0577	11.5795	0.969342
St-2-1_TTYSTUS	1233.14	76.4378	48.0593	15.9671	0.942403
St-2-1_SUUYTUU	1207.38	67.6027	48.0808	14.4274	0.952791
St-2-1_YSSSTUU	1248.26	56.1628	48.0858	11.5949	0.96882
St-2-1_YTYSTUY	1066.38	64.5453	48.0872	15.5986	0.942802
St-2-1_YTUSTTU	1071.86	74.534	48.1172	17.9287	0.928224
St-2-1_USUSTYY	1010.22	80.3193	48.1512	20.5133	0.902678
St-2-1_UUUSTUT	1204.11	53.9454	48.1664	11.5611	0.969629
St-2-1_STSYTSU	1084.26	77.2798	48.1679	18.3937	0.923509
St-2-1_TUSSTTU	1044.11	51.7938	48.2078	12.8105	0.964009
St-2-1_TTUYTTT	993.581	57.0438	48.2196	14.8293	0.950851
St-2-1_TSUSUUU	1160.47	49.3477	48.2313	10.986	0.973948
St-2-1_SSUSTUS	1427.4	56.3018	48.2542	10.1941	0.975319
St-2-1_UTUSTYU	1120.66	35.4761	48.2714	8.18384	0.984792
St-2-1_TUUSTST	1105.39	52.7671	48.272	12.3408	0.965665
St-2-1_UUYTTSU	731.084	34.7648	48.3097	12.3016	0.966384
St-2-1_SYYSTUY	1063.41	67.5302	48.3192	16.4306	0.937311
St-2-1_TSYSTTY	1048.99	48.301	48.3204	11.9139	0.967356
St-2-1_USUSTTY	1099.32	45.2973	48.3232	10.6621	0.97393
St-2-1_UTUYTSU	816.231	34.0384	48.3429	10.7943	0.972105
St-2-1_SUYSTUU	1057.55	69.0281	48.372	16.9032	0.9334
St-2-1_UYUYTUU	1108.5	60.7295	48.4367	14.2029	0.955505
St-2-1_TSUSTSU	1040.69	43.0418	48.4694	10.7287	0.974042
St-2-1_YSUSTYU	1290.51	87.9811	48.4708	17.6851	0.928114
St-2-1_TUSSTTT	1002.38	36.0548	48.5118	9.33727	0.9803
St-2-1_UUTYTTT	849.405	49.6515	48.5152	15.175	0.951539
St-2-1_SUUYTTS	1060.11	71.2721	48.5289	17.4572	0.929991
St-2-1_TTUSUUU	978.348	58.1286	48.5484	15.4323	0.950916
St-2-1_USYSTSY	943.217	44.1846	48.5685	12.172	0.965494
St-2-1_SUSSTUY	1088.04	71.572	48.5752	17.0941	0.9334
St-2-1_UUUYTTU	875.491	36.4594	48.6041	10.8273	0.974113
St-2-1_UTSSTUY	1088.4	55.6654	48.6293	13.303	0.959855
St-2-1_YUSSTUU	1103.15	30.355	48.6502	7.15986	0.98819
St-2-1_SUUYTUT	1095.4	72.5033	48.6726	17.2284	0.931983
St-2-1_STUSTYS	1151.86	80.0996	48.6729	18.1005	0.923107
St-2-1_SYTSTYY	973.256	78.5209	48.6806	21.0021	0.903901
St-2-1_TUSSTUT	1008.48	51.9354	48.6834	13.4073	0.959157
St-2-1_UYYSTTU	918.123	43.4107	48.6863	12.3098	0.966257
St-2-1_TYUSTYS	1172.92	69.1979	48.6955	15.3623	0.945718
St-2-1_USSYTTT	1042.47	60.9231	48.7236	15.2252	0.948511
St-2-1_USSSTUT	994.61	42.6958	48.7305	11.1846	0.971336
St-2-1_SYUSTSY	1129.33	64.5495	48.747	14.8965	0.949794
St-2-1_SUYTYUY	1496.64	71.0238	48.837	12.3871	0.967079
St-2-1_UTYTTUT	930.72	30.967	48.8371	8.68489	0.98371
St-2-1_TTUSSTU	891.791	57.5905	48.8673	16.864	0.942662
St-2-1_SSUSTTS	1225.31	84.6574	48.8717	18.0447	0.927719
St-2-1_YSSYTUS	1230.8	83.6504	48.8751	17.7516	0.928484
St-2-1_TUYTTSU	775.328	33.6665	48.8978	11.3459	0.97157
St-2-1_YSYSTUS	1249.6	67.1529	48.9169	14.0462	0.955743
St-2-1_UUUYTTS	1117.08	59.6565	48.9416	13.9639	0.957502
St-2-1_YTYSTSY	1336.24	91.2417	48.9476	17.8557	0.930661
St-2-1_UTSYTYY	879.506	61.4803	48.9512	18.2804	0.926709
St-2-1_YSYSTSU	1159.72	95.3899	48.9659	21.5162	0.901705
St-2-1_UYUSTTU	1002.15	47.2887	48.9672	12.344	0.966516
St-2-1_TTTSTUT	924.279	36.5144	48.9766	10.3363	0.976083
St-2-1_UTSYTTT	1022.85	48.3966	49.0003	12.3845	0.965709
St-2-1_TTTSTUU	982.219	52.968	49.0079	14.1169	0.957962
St-2-1_SUUYTTT	1061.41	47.8406	49.0176	11.8009	0.968402
St-2-1_TSSSTUT	1119.83	52.6696	49.0277	12.3163	0.966032
St-2-1_YSUSTST	1310.07	88.2591	49.0389	17.644	0.932539
St-2-1_STYTTSS	850.838	45.3796	49.0482	13.9711	0.955466
St-2-1_TYUYTUY	1089.57	64.2798	49.0602	15.4571	0.945883
St-2-1_YSUYTUT	1367.62	91.0907	49.0736	17.455	0.933011
St-2-1_STUYTUT	1046.29	75.1311	49.0971	18.8248	0.92005
St-2-1_TSUYTSU	922.857	63.4354	49.1226	18.0279	0.931141
St-2-1_TTUYTUY	1013.86	46.6796	49.1511	12.0811	0.966246
St-2-1_SUSYTUU	1118.81	59.1549	49.1631	13.8768	0.956265
St-2-1_YTSYTUY	1081.9	63.1639	49.167	15.3237	0.945822
St-2-1_SUYSTTT	1091.75	54.7523	49.1703	13.1642	0.96214
St-2-1_UTYSTST	1029.25	46.5233	49.1779	11.8661	0.967641
St-2-1_TYUSTYY	1019.27	71.7307	49.2474	18.4964	0.923729
St-2-1_UUYSTUY	1011.37	64.5205	49.2716	16.7741	0.938236
St-2-1_SUSYTTU	936.585	54.3792	49.2759	15.2673	0.946973
St-2-1_TUUYTTY	979.831	45.9771	49.2883	12.341	0.965015
St-2-1_TSYTYYS	1217.29	53.422	49.304	11.5456	0.971891
St-2-1_UUSYTST	885.127	46.8592	49.3047	13.9276	0.95672
St-2-1_TUSYTSS	1033.72	63.4673	49.3055	16.1524	0.942378
St-2-1_UTYTTTT	835.326	46.7197	49.3087	14.7147	0.956334
St-2-1_STSSTUY	1083.61	65.0225	49.3163	15.7892	0.944178
St-2-1_SYYSTTY	945.466	72.7344	49.3488	20.2537	0.911445
St-2-1_UUYSTTT	1002.75	62.9301	49.3586	16.5246	0.941652
St-2-1_TUSSTUS	1156.87	52.8676	49.3711	12.0359	0.968081
St-2-1_STUYTTU	910.681	51.2033	49.3981	14.8148	0.951387
St-2-1_UUSYTUS	1128.56	67.8301	49.4285	15.8448	0.945923
St-2-1_TUTSTUU	1095.04	43.44	49.4669	10.465	0.97718
St-2-1_YYUSTYT	1335.11	67.3365	49.4708	13.3055	0.960261
St-2-1_UTTSTUU	991.8	23.9274	49.4831	6.36594	0.991315
St-2-1_TUSSTUY	1087.08	60.2272	49.4854	14.6195	0.953286
St-2-1_YTUYTUY	981.72	46.4086	49.5034	12.4779	0.964818
St-2-1_TTTSTSS	945.762	59.2574	49.5034	16.5384	0.943729
St-2-1_USYSTTS	1101.34	53.7297	49.5164	12.8799	0.964331
St-2-1_STUYTTS	1040.45	49.5996	49.5355	12.5894	0.963923
St-2-1_SSYTYYS	1116.65	84.0729	49.5374	19.8843	0.918662
St-2-1_SYSYTUY	1056.97	60.0042	49.5483	14.9959	0.949546
St-2-1_TTTYTUY	941.558	47.2166	49.5546	13.2477	0.96291
St-2-1_UTUYTSS	970.319	69.6052	49.5572	18.9516	0.921876
St-2-1_TUYTTUY	914.628	36.6377	49.5639	10.5842	0.976264
St-2-1_SSTSTUS	1187.42	63.0631	49.5837	14.0373	0.957257
St-2-1_YUUYTUY	1321.01	84.3285	49.6651	16.8948	0.93868
St-2-1_YSSYTTU	1080.89	79.411	49.6701	19.4455	0.922356
St-2-1_UYSSTUT	1069.21	70.2079	49.6825	17.3838	0.937623
St-2-1_SYSSTYT	903.394	58.4829	49.711	17.1467	0.935312
St-2-1_TTUUTUS	949.551	47.0705	49.7322	13.1344	0.965435
St-2-1_UTUYTTU	911.11	42.5283	49.743	12.3699	0.9666
St-2-1_SYYTYYU	1117.17	62.7833	49.8216	14.912	0.95325
St-2-1_TUTYTUU	961.166	36.3412	49.8715	10.0411	0.978728
St-2-1_YSSYSUU	1099.19	57.3589	49.9029	13.8657	0.960976
St-2-1_TUSSTTY	964.766	33.135	49.9353	9.13086	0.982068
St-2-1_TUYSTUT	1084.11	59.4837	49.9401	14.5881	0.953331
St-2-1_TUSYTSU	954.692	52.0849	49.9553	14.5083	0.955509
St-2-1_USTSTUS	1112.81	70.5336	49.9599	16.8571	0.941971
St-2-1_TTYUTST	728.672	29.2085	49.9869	10.6658	0.975735
St-2-1_TTSYSTS	830.598	21.786	50.0132	6.9822	0.989616
St-2-1_YTSSTUY	1118.64	38.7529	50.0198	9.22261	0.981032
St-2-1_UTTSTYS	839.6	47.9514	50.0272	15.2059	0.951667
St-2-1_TTYSTST	980.101	37.688	50.037	10.2401	0.97703
St-2-1_TSYSTST	957.881	62.9148	50.0795	17.5032	0.93535
St-2-1_TUTSTTU	917.647	59.8774	50.0884	17.3904	0.941099
St-2-1_YTUSTTT	1047.85	37.895	50.149	9.64826	0.979439
St-2-1_TTYSTTY	960.397	49.9374	50.1707	13.8773	0.959015
St-2-1_SSUSTYS	1183.44	77.8964	50.1818	17.5693	0.932079
St-2-1_STYTYSY	1232.24	74.0187	50.1867	16.0355	0.947513
St-2-1_SYYSTYU	1057.79	54.0212	50.1978	13.636	0.960191
St-2-1_YUUSTTT	1323.2	52.74	50.2026	10.6429	0.976479
St-2-1_TUYSTTY	997.887	48.2649	50.2177	12.9185	0.963965
St-2-1_YSYSTUU	1175.86	58.4832	50.2209	13.285	0.962438
St-2-1_YUSSTUS	1278.95	47.5387	50.2211	9.92817	0.979316
St-2-1_YYYTTYT	946.648	66.526	50.2752	18.7879	0.930388
St-2-1_TUTSTTY	923.32	59.8616	50.2874	17.3362	0.940217
St-2-1_SSYSTUT	1272.18	82.8406	50.3096	17.4179	0.937465
St-2-1_SYUSTTY	1076.36	42.1171	50.312	10.4671	0.976168
St-2-1_STTSTSU	984.652	39.8804	50.3473	10.8408	0.975855
St-2-1_TYSYTUS	1048.35	69.233	50.3555	17.6782	0.932017
St-2-1_YSSYTYU	1058.94	59.7802	50.3621	15.1138	0.950379
St-2-1_USUSTTS	1185.27	55.4304	50.4103	12.5304	0.966962
St-2-1_YSYTTUS	1142.36	55.6139	50.4156	13.0452	0.966419
St-2-1_SSTYTUY	966.722	38.7373	50.4215	10.7384	0.975191
St-2-1_UYSSTUS	1148.1	66.8971	50.423	15.6148	0.949752
St-2-1_TSUYTTY	990.197	41.8065	50.4446	11.3185	0.971946
St-2-1_STSYSTS	897.512	43.5095	50.4508	12.9971	0.964935
St-2-1_YSYSTYY	1048.51	67.6538	50.459	17.3021	0.936517
St-2-1_UTSSTYS	1023.51	53.6736	50.4914	14.0691	0.959472
St-2-1_TUTSTUY	1077.13	74.0779	50.5131	18.4577	0.932367
St-2-1_TUUTTUY	987.235	46.7945	50.532	12.7253	0.96713
St-2-1_UUSYTSY	828.705	64.4955	50.5342	20.8943	0.909756
St-2-1_USYSTTU	973.693	47.8038	50.5721	13.1889	0.963628
St-2-1_YYUYTYT	1303.72	75.1919	50.6002	15.5005	0.950876
St-2-1_UTTSTSS	818.751	62.1112	50.6117	20.392	0.916134
St-2-1_TUTSTSU	978.832	70.2479	50.6132	19.2933	0.931317
St-2-1_SYSSYYY	829.146	17.868	50.6335	5.79511	0.993058
St-2-1_UYUSTYS	1164.08	62.9088	50.6505	14.5364	0.954526
St-2-1_TUYSTTU	1025.21	40.7548	50.6631	10.6953	0.976143
St-2-1_TTYTTUT	830.392	35.1211	50.6643	11.3795	0.973839
St-2-1_UUSSTTU	942.306	32.4782	50.6791	9.27547	0.98254
St-2-1_USYTYUS	1504.41	56.1795	50.6917	10.0516	0.980235
St-2-1_TUUYTSY	872.984	56.5709	50.6968	17.4433	0.936646
St-2-1_TTYTUSS	814.507	49.4305	50.6981	16.3375	0.949548
St-2-1_UTUYTSY	923.131	51.9576	50.7015	15.1521	0.950377
St-2-1_UTTSTUS	1036.27	45.4353	50.738	11.8108	0.971103
St-2-1_TTYSTTS	1044.22	46.6326	50.7435	12.0307	0.969846
St-2-1_SUUYTTY	973.447	85.7805	50.755	23.7448	0.884608
St-2-1_TYYTYUY	1248.25	70.3133	50.76	15.1792	0.954812
St-2-1_TTYTYUS	1239.65	66.8693	50.7613	14.5362	0.958505
St-2-1_YSSSTSU	1115.63	49.6692	50.7665	11.998	0.970671
St-2-1_USYSTYT	935.932	62.2581	50.771	17.9282	0.933869
St-2-1_TTSYTYY	777.436	51.1759	50.7888	17.7457	0.93455
St-2-1_YSUSTTY	1253.61	73.6415	50.7952	15.838	0.948691
St-2-1_SSYSTTY	1162.12	49.0184	50.7978	11.3733	0.97309
St-2-1_TYYSTYY	952.018	65.7713	50.7985	18.6274	0.928296
St-2-1_YTUSTSY	1112.84	79.9134	50.8019	19.3626	0.923309
St-2-1_YUYSTSY	1099.73	68.6967	50.8071	16.8457	0.940071
St-2-1_TTUYSUY	928.388	45.8723	50.8142	13.3265	0.964901
St-2-1_TTSSTTT	990.85	59.2177	50.8209	16.1205	0.949179
St-2-1_YTSSTTS	932.078	39.8704	50.8364	11.5412	0.972521
St-2-1_TUTSTUS	1075.04	67.0368	50.8527	16.8281	0.943258
St-2-1_UYSYTTT	1170.82	63.4343	50.8737	14.6267	0.958574
St-2-1_UYUYTUS	1185.45	54.1314	50.8751	12.3279	0.968478
St-2-1_UUTSTUT	984.96	44.3571	50.879	12.1587	0.970329
St-2-1_UTYSTTT	1133.41	61.9085	50.8831	14.7481	0.95672
St-2-1_UUUYTYY	885.64	44.5356	50.8831	13.5779	0.963845
St-2-1_TUYTSUY	911.134	41.4015	50.8876	12.2703	0.970658
St-2-1_STYTTTT	783.125	26.8454	50.904	9.25901	0.982692
St-2-1_TSYSTSY	931.198	63.2682	50.9148	18.3538	0.93007
St-2-1_STYTUTS	842.061	62.0882	50.9156	19.919	0.929619
St-2-1_TUTYTUT	964.483	38.7896	50.9161	10.8647	0.975964
St-2-1_TTYUTSU	731.109	47.07	50.9358	17.3984	0.940784
St-2-1_TUYTTTT	837.32	42.0216	50.9494	13.5655	0.965024
St-2-1_USYTTUU	928.146	49.8698	51.0168	14.5393	0.959441
St-2-1_UYSYTTU	970.632	50.5294	51.0442	14.0925	0.96041
St-2-1_UTYSTTU	963.642	55.2734	51.0446	15.5279	0.950007
St-2-1_SUSSTST	1146.04	75.5791	51.0661	17.8591	0.937566
St-2-1_UTUTTUT	925.707	36.0678	51.0987	10.557	0.978234
St-2-1_UTSSTTT	1038.32	58.1337	51.12	15.1751	0.954741
St-2-1_TTUSTYY	981.275	59.1273	51.128	16.334	0.945052
St-2-1_UYUSTTY	956.269	56.2433	51.1293	15.9432	0.947675
St-2-1_YTUYTYS	1111.42	31.9477	51.1422	7.79401	0.987335
St-2-1_YSUYTYT	1244.39	97.1493	51.1634	21.1747	0.911462
St-2-1_YSUYTTY	1143.78	49.6397	51.1637	11.7715	0.971136
St-2-1_YTUSTSS	1176.99	74.1723	51.1716	17.0949	0.938845
St-2-1_YTUYTTT	1023.44	74.4843	51.1881	19.7471	0.924516
St-2-1_STUYTSY	1065.08	58.6281	51.2145	14.9424	0.952826
St-2-1_SUUYTSY	1085.97	34.8388	51.2354	8.71146	0.983945
St-2-1_UTSYSUU	928.187	68.9132	51.2617	20.1697	0.92336
St-2-1_SSUYTUT	1383.27	69.4999	51.2627	13.6495	0.962223
St-2-1_USYSTYU	893.887	60.7198	51.2669	18.4546	0.933382
St-2-1_UUYTTST	825.664	35.6168	51.2708	11.7206	0.973288
St-2-1_YYUSTUY	1342.34	62.8584	51.2859	12.7263	0.966319
St-2-1_STYTYUY	1192.99	53.4659	51.3079	12.1842	0.969681
St-2-1_TYTYTYS	984.725	49.9789	51.3145	13.7998	0.962756
St-2-1_STUYTYS	1130.92	51.0496	51.3239	12.2749	0.968361
St-2-1_USYSTYS	1028.46	67.2799	51.3643	17.801	0.935967
St-2-1_TUUYTSU	910.323	42.0466	51.3785	12.5709	0.968282
St-2-1_TUUSTTY	1128.05	74.0794	51.385	17.8751	0.937441
St-2-1_STYTUSU	808.439	47.05	51.3928	15.8441	0.952445
St-2-1_TSTSTUT	1072.14	49.1492	51.4068	12.4823	0.96896
St-2-1_UTSSTUT	1239.82	58.6374	51.4142	12.8799	0.967701
St-2-1_TTUSTYS	1021.87	51.4213	51.4286	13.7069	0.960905
St-2-1_YTUSTUU	1174.46	50.7674	51.453	11.7791	0.970676
St-2-1_TTYTUST	701.95	29.6812	51.4538	11.5225	0.974611
St-2-1_YUUSTTS	1224.2	59.5288	51.463	13.2529	0.964246
St-2-1_SUUSUUY	1082.69	50.4743	51.467	12.7063	0.968104
St-2-1_UTYTYUU	1364.17	66.9321	51.4797	13.376	0.966383
St-2-1_SUUSTSU	1056	63.0294	51.4871	16.2732	0.945284
St-2-1_UTUSSUS	1052.38	64.8244	51.5089	16.8	0.94454
St-2-1_USUYTUT	1084	63.1304	51.5111	15.8847	0.94924
St-2-1_TSSSTTS	1064.88	49.7354	51.5163	12.7401	0.967512
St-2-1_UTSSTTY	924.945	59.8366	51.5659	17.6596	0.93756
St-2-1_UYYTYYS	1138.47	69.2376	51.57	16.6034	0.946927
St-2-1_YUUSTUT	1228.51	68.7444	51.5772	15.2787	0.952124
St-2-1_UYUSTTT	1053.32	58.1325	51.5853	15.0706	0.955721
St-2-1_TYTYTUS	958.224	71.4511	51.5922	20.364	0.92038
St-2-1_YUUYTTT	1102.04	47.0924	51.6147	11.6747	0.972618
St-2-1_UTUSTTY	1038.5	62.8603	51.6308	16.5405	0.944881
St-2-1_UTTSTTU	927.473	53.6039	51.6327	15.7948	0.953846
St-2-1_TSTSTTS	990.196	45.7537	51.6481	12.6305	0.968739
St-2-1_TSYTTUU	883.398	40.9447	51.6747	12.6751	0.968948
St-2-1_TSUYTYS	956.752	69.8332	51.6809	19.963	0.919
St-2-1_TSYSTSU	914.719	63.7484	51.6843	19.0603	0.927018
St-2-1_USUYTYU	943.564	34.8555	51.6922	10.1048	0.97912
St-2-1_YYUSTUU	1453.71	55.1755	51.6987	10.3835	0.978349
St-2-1_STYTYUS	1424.95	89.3378	51.7113	17.1546	0.945277
St-2-1_TTTYTUS	911.13	42.2827	51.7645	12.7087	0.968403
St-2-1_SUSYTST	1017.75	75.1762	51.792	20.2366	0.918822
St-2-1_SUYSTTY	1078.46	69.7189	51.7997	17.7131	0.937901
St-2-1_USUYTUU	995.663	52.2106	51.806	14.3701	0.958715
St-2-1_UTSTTUU	862.145	47.1685	51.8114	14.994	0.959061
St-2-1_USUYTTS	1017.79	51.6675	51.8196	13.9146	0.961416
St-2-1_UYYSTSY	890.521	60.3966	51.8237	18.5909	0.929971
St-2-1_UTUSTTU	1037.74	25.2076	51.8274	6.65891	0.990913
St-2-1_TTYTTSU	760.678	52.5773	51.8332	18.9496	0.932359
St-2-1_UUUSTTT	1000.4	31.2846	51.8485	8.57563	0.985281
St-2-1_UTTSTYY	827.217	54.055	51.8492	17.9186	0.936725
St-2-1_TUTSTSY	869.844	63.4906	51.8666	20.0216	0.92567
St-2-1_USUYTTU	869.197	40.2877	51.8772	12.7162	0.967601
St-2-1_YSYSTUT	1206.32	86.7004	51.8838	19.7197	0.924883
St-2-1_SSSYTTY	986.484	75.8785	51.887	21.1054	0.911647
St-2-1_TUUYTTS	1052.04	62.7253	51.8932	16.3609	0.946316
St-2-1_TSTYTUY	924.949	37.3928	51.9358	11.1015	0.975167
St-2-1_TUSYTTS	1074.09	54.4073	51.9509	13.9132	0.96074
St-2-1_TSSYTST	899.789	57.3814	51.9519	17.5159	0.940066
St-2-1_TYUYTTU	889.397	60.6086	51.9561	18.7186	0.932454
St-2-1_TYSYTSS	1085.33	46.6079	51.9697	11.7985	0.972387
St-2-1_TUTSTUT	1176.3	46.485	51.9721	10.8581	0.978186
St-2-1_TUUYTSS	913.936	55.6641	51.9912	16.7396	0.942779
St-2-1_TYYSTTY	962.401	68.2012	51.9917	19.4768	0.925835
St-2-1_STSYYUU	1021.86	42.9951	52.0252	11.5712	0.975121
St-2-1_YYYTYYY	1155.33	84.6265	52.0322	20.1451	0.923773
St-2-1_UYUYTSY	945.355	64.5078	52.0529	18.7725	0.932509
St-2-1_TTUYTSS	916.999	79.761	52.0696	23.9369	0.891697
St-2-1_TSSSTTT	968.448	43.6931	52.0707	12.4158	0.969473
St-2-1_UYYSTSS	1104.32	64.1645	52.0727	15.9902	0.950358
St-2-1_SSYSTYY	980.263	74.7921	52.0746	20.9995	0.912932
St-2-1_YSSYTYS	1043.91	80.7036	52.096	21.2845	0.909793
St-2-1_TUUYTST	1076.63	50.2419	52.0993	12.8476	0.968072
St-2-1_YTSSTUU	1085.65	48.4039	52.1047	12.2762	0.970261
St-2-1_UUUSSSS	920.852	59.7794	52.1053	17.8758	0.942774
St-2-1_TSSYSTS	930.937	37.8322	52.1252	11.1932	0.975749
St-2-1_TTSYSSS	854.505	32.6611	52.128	10.5282	0.978208
St-2-1_TSSYTSU	943.821	72.8618	52.1438	21.2691	0.916033
St-2-1_TYUSTTS	1047.16	43.5693	52.1506	11.4645	0.973823
St-2-1_USSSTTU	882.014	40.9673	52.1834	12.8049	0.967896
St-2-1_STSSTYS	1126.32	57.3091	52.1918	14.0291	0.961805
St-2-1_UYSSTUY	1173.81	66.0479	52.2068	15.5177	0.954382
St-2-1_SYUSTSU	1091.18	40.1715	52.2174	10.1546	0.97908
St-2-1_TTUSSUY	913.608	73.9677	52.2452	22.3416	0.908516
St-2-1_UUYTTSY	739.356	49.9984	52.2481	18.6617	0.934435
St-2-1_YUUSTUU	1291.64	67.8665	52.2734	14.5059	0.958589
St-2-1_TSTSTTY	838.613	46.451	52.2751	15.2917	0.954602
St-2-1_TTUSTSU	969.262	37.3406	52.2811	10.6369	0.977989
St-2-1_TSTYTUU	1047.18	54.0495	52.2969	14.2549	0.962297
St-2-1_TSSYTYS	1016.61	66.7646	52.3248	18.1446	0.935067
St-2-1_SSUSTTY	1116.35	52.3462	52.3248	12.9556	0.965939
St-2-1_TUYSTTT	1017.99	57.5375	52.3605	15.6248	0.953002
St-2-1_UTUSUYT	1077.12	54.3898	52.3626	13.9612	0.965096
St-2-1_UYUYTYS	977.872	54.8868	52.3652	15.5181	0.951503
St-2-1_TUUSSUU	983.844	38.6272	52.3668	10.8552	0.977783
St-2-1_TYYSTSY	943.107	64.6434	52.3718	18.9522	0.929042
St-2-1_SYSYTYU	983.72	69.6099	52.376	19.5685	0.923957
St-2-1_USSYTUS	1176.22	74.5481	52.3779	17.5257	0.940393
St-2-1_YTYTYUY	1298.05	62.4199	52.3913	13.3004	0.966305
St-2-1_SUYTYST	1152.19	63.5641	52.4053	15.262	0.955938
St-2-1_TSYTYUU	1309.34	74.8118	52.4248	15.8118	0.954819
St-2-1_UTTYTTU	933.521	53.7287	52.4266	15.9285	0.954234
St-2-1_TSSSTUU	1080.72	52.1136	52.4314	13.3458	0.965156
St-2-1_TYUYTUS	1071.47	69.3842	52.4333	17.9219	0.936086
St-2-1_TUUSTYT	1095.94	35.2736	52.4436	8.90948	0.984758
St-2-1_SSYTYST	1101.22	56.7325	52.4646	14.2659	0.962658
St-2-1_YTYTTSY	889.7	46.5656	52.4648	14.4931	0.959027
St-2-1_YSTYTUS	1233.66	67.1736	52.4818	15.0818	0.957053
St-2-1_UTSYUUS	1008.62	49.2103	52.482	13.5138	0.965726
St-2-1_YUUYTUU	1247.73	48.1849	52.4872	10.6976	0.977772
St-2-1_USTSTUY	967.847	47.5094	52.5241	13.6051	0.964226
St-2-1_YTUYTYU	1079.99	60.8855	52.5535	15.633	0.9551
St-2-1_TYUYTUT	1012.43	42.5357	52.5653	11.6521	0.972523
St-2-1_UTTYTTT	751.758	34.8933	52.5736	12.875	0.968053
St-2-1_SSUSTTU	1041.27	71.7632	52.5753	19.1166	0.929218
St-2-1_UYYSTUY	1084.21	57.7494	52.5925	14.779	0.957484
St-2-1_TSSYTTU	1008.64	56.0822	52.6052	15.4301	0.953881
St-2-1_STUYTTT	1118.7	55.1281	52.6143	13.6778	0.9638
St-2-1_USUSTST	1054.46	54.9858	52.6181	14.4745	0.959716
St-2-1_YTUYTUU	1090.71	46.9731	52.6645	11.963	0.971995
St-2-1_SUYTYTU	1007.99	55.6968	52.6762	15.3514	0.957515
St-2-1_UUYTTSS	929.729	70.3664	52.6865	21.0308	0.923635
St-2-1_TSUYTYY	916.183	60.3544	52.6876	18.3054	0.932243
St-2-1_SSYTYUY	1333.74	46.703	52.6883	9.73029	0.981933
St-2-1_UYUYTYY	1091.21	67.2389	52.6901	17.1223	0.944358
St-2-1_YYUYTUT	1184.32	64.0018	52.6979	15.0192	0.955911
St-2-1_YTUSYYS	1013.81	52.0051	52.7037	14.258	0.963154
St-2-1_TUYTYUY	1231.72	53.3206	52.7215	12.0357	0.973036
St-2-1_SUYSTTS	1148.5	68.1915	52.7259	16.5083	0.948576
St-2-1_USYTTUY	900.701	48.1528	52.7303	14.8654	0.958527
St-2-1_TUYUTSS	875.957	42.2207	52.7503	13.4069	0.966659
St-2-1_TTSYTUS	1126.25	68.8261	52.7529	16.9987	0.943976
St-2-1_SSTSTUU	962.659	48.7403	52.792	14.0923	0.961548
St-2-1_YYUYTUS	1165.39	78.1061	52.8082	18.6585	0.933103
St-2-1_YTYTYYY	1170.78	55.4827	52.8251	13.1968	0.967511
St-2-1_TUTSTTS	916.769	25.0539	52.8283	7.61063	0.989027
St-2-1_SYYTYYT	1226.75	67.9044	52.8283	15.4152	0.95606
St-2-1_SUSYTTS	1045.81	78.2713	52.8549	20.8524	0.915917
St-2-1_TTSSTTS	926.72	57.0164	52.8728	17.1457	0.945379
St-2-1_TTUYTSY	948.153	50.345	52.8961	14.803	0.957842
St-2-1_YSYSTUY	1156	65.7484	52.9239	15.8629	0.950189
St-2-1_TYSYTTT	930.174	83.0857	52.9387	24.9199	0.888866
St-2-1_UTYTYYS	1329.02	55.3319	52.9405	11.6155	0.975985
St-2-1_YSSYTUT	1420.51	67.5487	52.9707	13.2721	0.966755
St-2-1_USTSTTU	945.775	57.1434	52.9749	16.865	0.950205
St-2-1_UYYSTSU	981.489	51.7394	52.9799	14.7155	0.959056
St-2-1_UUTYTUY	909.443	29.6928	52.9998	9.11677	0.984428
St-2-1_TTTSTUY	1033.46	52.9584	53.0275	14.3153	0.962716
St-2-1_SYTYTYT	917.361	69.8884	53.0404	21.2859	0.91609
St-2-1_YTYSTTU	988.044	50.7844	53.061	14.3658	0.961684
St-2-1_TTUSUSU	949.608	48.8272	53.0664	14.3726	0.964198
St-2-1_TTYTTTS	727.936	29.0292	53.0702	11.1478	0.977036
St-2-1_UTYTTTS	880.372	35.9923	53.0785	11.4302	0.976047
St-2-1_UYYTYYY	1112.39	65.762	53.0874	16.5302	0.950381
St-2-1_USTYTTU	856.281	52.8938	53.1104	17.2786	0.94712
St-2-1_YSYTYYS	1419.96	41.0205	53.1114	8.08077	0.987909
St-2-1_YYYSTUU	1218.13	80.6985	53.1357	18.5378	0.937687
St-2-1_TTUSSUU	987.702	49.8322	53.1394	14.1182	0.964538
St-2-1_SSSSTTU	949.364	61.5037	53.1455	18.1308	0.940386
St-2-1_YTYSTTS	1219.62	82.0309	53.1891	18.8366	0.937489
St-2-1_YUYSTYU	912.803	54.8666	53.1899	16.8339	0.948771
St-2-1_UYSSTYS	1022.78	53.1183	53.195	14.5464	0.960231
St-2-1_TSYSTUT	1104.28	49.592	53.2125	12.5816	0.969272
St-2-1_YSSYTTS	1109.07	83.0931	53.2163	20.9909	0.919995
St-2-1_SUSSTYS	1029.94	49.7633	53.23	13.54	0.966294
St-2-1_USUSSUY	1069.07	73.2051	53.2336	19.1896	0.935164
St-2-1_SSTSTUY	1219.42	70.4139	53.285	16.1954	0.952106
St-2-1_YYYSTYS	1179.87	65.9551	53.2903	15.6794	0.953663
St-2-1_UTUSSTS	910.96	29.8776	53.298	9.20091	0.98409
St-2-1_SSSSUTS	1019.06	64.2835	53.299	17.6968	0.947394
St-2-1_STYTTYT	823.552	55.1136	53.3604	18.7916	0.937018
St-2-1_UYSYTYU	884.596	59.2921	53.3827	18.8274	0.933485
St-2-1_TTUSTTU	923.115	55.3282	53.3876	16.8367	0.947
St-2-1_YTUSSSS	1177.33	71.3969	53.3967	17.0381	0.949736
St-2-1_UTUSTSY	994.558	49.6582	53.4062	14.0303	0.961605
St-2-1_UYSYTTY	929.497	51.3226	53.4108	15.5161	0.954881
St-2-1_USSSTTY	1049.94	57.6488	53.4165	15.4312	0.95689
St-2-1_TSUTTYS	982.057	52.7108	53.4275	15.0869	0.959902
St-2-1_UTYTTUU	955.356	35.0738	53.4456	10.3229	0.981095
St-2-1_SSYSTSY	989	60.5981	53.4813	17.2367	0.942447
St-2-1_SUUSTYU	1103.57	59.8667	53.5066	15.2668	0.957213
St-2-1_TUUTTUS	1031.29	53.7469	53.5148	14.6693	0.9617
St-2-1_YUSYTUS	1148.61	78.9934	53.5174	19.3584	0.93079
St-2-1_YYSSTUU	1065.08	33.5455	53.5197	8.86592	0.985314
St-2-1_TUYSTSU	1025.63	51.659	53.5507	14.1851	0.962362
St-2-1_SYUYTYY	1056.85	69.3293	53.552	18.4744	0.933139
St-2-1_TSTSTYY	1016.57	35.9515	53.5527	9.96019	0.981591
St-2-1_STYSTYS	1008.31	66.392	53.5584	18.545	0.935897
St-2-1_STUSTTU	1081.14	56.5849	53.5631	14.7427	0.959406
St-2-1_STUTTUS	959.553	52.0324	53.6103	15.2851	0.95733
St-2-1_TUSYSTY	972.474	59.9891	53.6318	17.3946	0.947532
St-2-1_YSYSTYS	1145.69	77.5883	53.6608	19.1038	0.933444
St-2-1_UYUYTUT	1026.75	50.3259	53.6636	13.8279	0.964128
St-2-1_UYYSTUT	1255.38	42.6864	53.6657	9.59301	0.98322
St-2-1_STUUTTY	910.76	30.4457	53.6742	9.43254	0.984238
St-2-1_SSSSTUU	1109.03	38.9261	53.6791	9.90444	0.9816
St-2-1_TUYTTTY	881.196	44.1495	53.6908	14.1407	0.965446
St-2-1_UYTYTUY	904.333	29.871	53.6935	9.32273	0.983816
St-2-1_SYSYTTS	993.56	64.5948	53.7022	18.3515	0.937535
St-2-1_YTYSTUT	1123.85	71.3812	53.704	17.9291	0.940446
St-2-1_TTSYUUS	1109.94	44.8847	53.7478	11.4237	0.977116
St-2-1_YTSYTTU	1010.19	39.6622	53.7564	11.0922	0.976765
St-2-1_YUUYTTS	1135.73	42.0682	53.7649	10.4658	0.979575
St-2-1_SSUSTSY	986.734	103.296	53.7668	29.582	0.849085
St-2-1_YSYSTYU	1136.73	46.0257	53.7997	11.4468	0.975024
St-2-1_UTYSTYY	923.936	40.4144	53.801	12.3659	0.972049
St-2-1_SUSSTTS	1098.6	43.611	53.8045	11.2232	0.976774
St-2-1_TSSSTSS	979.181	44.8238	53.8059	12.9427	0.968924
St-2-1_USSYTST	877.714	53.7604	53.8068	17.3178	0.943511
St-2-1_TSUYTTU	1019.43	44.5945	53.8244	12.3716	0.971461
St-2-1_UTYTYUS	1578.47	95.7233	53.8304	17.1525	0.950784
St-2-1_TSYTYYY	1091.48	50.4266	53.865	13.0743	0.969627
St-2-1_UYSYTUY	995.958	49.7132	53.8832	14.1293	0.962246
St-2-1_STTSTUT	1039.11	68.6662	53.9065	18.7118	0.93756
St-2-1_SYUYTYS	1089.93	81.3123	53.9127	21.1282	0.915842
St-2-1_SYSYTUU	1135.35	62.258	53.9209	15.5309	0.955896
St-2-1_TTYTTUU	821.174	32.5851	53.9351	11.2415	0.97737
St-2-1_TYSSTTT	1016.45	48.0834	53.9414	13.4024	0.967733
St-2-1_YSYSTTY	1077.37	49.0983	53.9532	12.9139	0.968718
St-2-1_STSSTYT	1224.72	91.6738	53.9693	21.2166	0.92415
St-2-1_SYYTYUS	1428.92	42.9801	53.9701	8.52594	0.987354
St-2-1_UTSSTSS	1063.4	72.066	53.9947	19.2158	0.933621
St-2-1_YSUSTYT	1244.99	87.0009	54.0111	19.8209	0.925693
St-2-1_YTUSTSU	1106.46	47.8857	54.0257	12.2771	0.9722
St-2-1_SSYTTUY	902.163	38.9022	54.03	12.2334	0.9728
St-2-1_YSYSTTT	1106.3	47.3323	54.0434	12.1405	0.973646
St-2-1_SYSYTSU	982.537	80.7378	54.0653	23.3264	0.902969
St-2-1_YTUYTST	953.622	53.1785	54.0672	15.8296	0.951862
St-2-1_TSSYTYT	1035.24	65.4562	54.0721	17.9488	0.941027
St-2-1_UTUSSUU	1053.73	49.5818	54.1163	13.3667	0.969275
St-2-1_USYTYTY	997.679	44.9373	54.1193	12.7962	0.971654
St-2-1_SSYSTUU	1387.32	56.1357	54.1246	11.4962	0.976436
St-2-1_TUUSTSY	985.239	57.6429	54.1247	16.6218	0.948628
St-2-1_USSSTUU	1130.36	56.2656	54.1762	14.1533	0.96488
St-2-1_SUUSTYY	1129.55	59.9815	54.1762	15.0989	0.957563
St-2-1_YTSSTTT	1108.81	57.4344	54.1837	14.7299	0.962828
St-2-1_YSYTTSY	856.654	48.0868	54.1978	15.9657	0.954165
St-2-1_STUSSTY	959.996	40.6616	54.222	12.0514	0.973645
St-2-1_TYUYTSS	905.461	63.0534	54.2305	19.8163	0.9299
St-2-1_SUSSTUS	1214.45	77.5632	54.289	18.1906	0.941314
St-2-1_YYUYTYY	1068.12	75.1595	54.3058	20.0471	0.926563
St-2-1_UTSSTYY	896.137	20.9114	54.3177	6.64937	0.991821
St-2-1_UTUSSUT	945.508	41.9595	54.3382	12.6495	0.971204
St-2-1_UYYTYYU	1160.61	55.9395	54.3423	13.7389	0.967663
St-2-1_TUYTTST	797.793	45.468	54.3606	16.2504	0.953545
St-2-1_UUSSTSU	869.974	42.477	54.3664	13.923	0.965854
St-2-1_SSUSTYT	1216.81	78.4405	54.4023	18.3923	0.938303
St-2-1_YTSYTUU	1162.39	71.4269	54.4082	17.5332	0.94547
St-2-1_TTSYTYS	828.28	47.5595	54.4091	16.3839	0.95141
St-2-1_UTSYUUU	892.888	33.521	54.4092	10.7125	0.979754
St-2-1_USUSTSY	1060.97	51.5637	54.4915	13.8851	0.965733
St-2-1_SUUSUTY	1029.16	42.6784	54.5096	11.851	0.975329
St-2-1_TUUYTYT	923.128	62.8235	54.5165	19.4508	0.935984
St-2-1_USUYTYT	1028.64	58.9987	54.5225	16.3945	0.95126
St-2-1_TUYTTUT	949.825	51.101	54.5493	15.384	0.959837
St-2-1_UUYTSST	848.502	37.9908	54.5592	12.8054	0.972846
St-2-1_UYYSTYS	991.849	53.9437	54.5639	15.555	0.956536
St-2-1_TTYSTTT	918.75	43.2769	54.5663	13.473	0.967053
St-2-1_SUTSTUS	1198.1	50.8388	54.5877	12.1407	0.974086
St-2-1_SUSYTUT	1018.31	61.366	54.5915	17.2423	0.94614
St-2-1_TUYTTSY	815.003	49.3324	54.5918	17.3197	0.947788
St-2-1_YTUYTTU	941.281	69.3232	54.6131	21.0799	0.923902
St-2-1_SYSSTUU	1058.03	51.076	54.6148	13.818	0.965816
St-2-1_YSYSTST	1134.2	65.1453	54.6334	16.4452	0.95121
St-2-1_SUYTYUS	1351.23	54.0364	54.6416	11.4514	0.97717
St-2-1_UTUYTYT	972.375	41.7966	54.6974	12.3189	0.972504
St-2-1_UYSYTUS	1030.02	50.2607	54.7073	13.9865	0.964106
St-2-1_YTSSTSY	1048.17	66.1817	54.7111	18.0985	0.940707
St-2-1_TSTYTUS	1038.17	49.6298	54.7137	13.704	0.966441
St-2-1_TYUSSUS	1108.61	73.4695	54.7254	19.0006	0.937934
St-2-1_UTSYUSS	943.462	45.8372	54.7308	13.9308	0.9666
St-2-1_SSSYTTU	991.744	64.685	54.7334	18.702	0.937098
St-2-1_YYSYTUT	1204.5	92.2306	54.7336	21.9557	0.918406
St-2-1_YYSYTUY	1118.8	82.8437	54.7752	21.247	0.920789
St-2-1_YSSSTUY	1395.35	57.5681	54.7878	11.8401	0.975437
St-2-1_SSSYTSS	1075.7	64.1798	54.7926	17.1233	0.946868
St-2-1_TSYTYUS	1277.18	65.7396	54.7952	14.7733	0.962431
St-2-1_TSSSTTU	961.712	33.4239	54.7981	9.97538	0.982397
St-2-1_TUSSUTT	895.417	54.6543	54.8603	17.5358	0.950944
St-2-1_SSUSSUS	1143.69	72.5666	54.8606	18.2285	0.942365
St-2-1_SUSSTUT	1210.67	92.2441	54.8649	21.8912	0.918744
St-2-1_TTUSSTS	904.647	43.8439	54.8707	13.926	0.966768
St-2-1_SYUSTYT	1255.24	90.4407	54.8744	20.7055	0.922042
St-2-1_UYSSTYT	982.97	65.227	54.8918	19.0727	0.937122
St-2-1_USSYTSS	969.732	82.6001	54.892	24.4846	0.897073
St-2-1_USYTTST	798.357	34.3312	54.8961	12.3611	0.973689
St-2-1_SSYTYYU	1096.97	32.2351	54.9267	8.45074	0.987556
St-2-1_UTYUTST	783.602	50.9141	54.9299	18.6865	0.940714
St-2-1_UTUSUUT	1059.98	48.4694	54.9332	13.1515	0.970531
St-2-1_YSYSTYT	1102.06	73.5792	54.9446	19.2055	0.935168
St-2-1_SYYSTUU	1321.55	87.78	54.9621	19.1122	0.939584
St-2-1_STYTTUT	872.81	63.0085	54.9708	20.7746	0.928144
St-2-1_TSUSSUU	1043.06	71.1531	54.9744	19.6314	0.935363
St-2-1_USSYTTS	1112.27	83.1553	54.9823	21.5175	0.920771
St-2-1_TTYTUSY	695.628	44.4832	54.9903	18.4077	0.94419
St-2-1_SYSSTST	1073.66	63.9352	55.0064	17.1451	0.948999
St-2-1_UTUSUUS	1036.72	52.3663	55.0089	14.544	0.963744
St-2-1_USUYTTY	907.237	56.2078	55.0126	17.8399	0.94315
St-2-1_SYTYTUY	1052.27	35.9355	55.0287	9.83602	0.983074
St-2-1_TSUSSUY	1070.13	66.1826	55.0301	17.8131	0.945045
St-2-1_YSUSTSY	1229.08	74.2466	55.0343	17.4002	0.945897
St-2-1_SSYTTYS	925.363	41.7618	55.0431	13.001	0.971422
St-2-1_STYYTUT	1045.57	64.7526	55.051	17.8429	0.94972
St-2-1_STYTSUY	904.154	49.2193	55.0544	15.6851	0.958697
St-2-1_YUUSTSU	1120.68	46.24	55.1149	11.8991	0.975235
St-2-1_UTYUTSS	919.966	59.4721	55.1213	18.6453	0.941303
St-2-1_SUUSTST	1036.49	52.6472	55.1214	14.65	0.960593
St-2-1_UYYSTTY	956.009	52.3978	55.1287	15.8095	0.956136
St-2-1_UTUYUST	1002.22	70.6177	55.1376	20.3282	0.936503
St-2-1_SUSSTSS	1007.92	59.2226	55.1425	16.9517	0.949056
St-2-1_TYSSTUY	1088.88	65.3283	55.1445	17.3099	0.947367
St-2-1_TYTYTUY	927.475	41.0363	55.1486	12.7662	0.97133
St-2-1_SUSSTTU	933.288	43.296	55.167	13.3893	0.96805
St-2-1_YSYSTSS	1129.37	79.9115	55.1677	20.4222	0.927317
St-2-1_TSUYTTT	988.437	54.5909	55.1823	15.9434	0.954191
St-2-1_SYYSTYT	1053.34	74.7216	55.1896	20.4821	0.926047
St-2-1_YUYTYYS	1162.12	44.4062	55.2023	11.0345	0.979398
St-2-1_TTUSSTY	847.376	50.3163	55.2046	17.1475	0.950147
St-2-1_STYTYUT	1124.53	70.7083	55.2064	18.1585	0.944694
St-2-1_YTUSTYT	1206.39	60.3863	55.2207	14.458	0.962798
St-2-1_TUUSSUY	1123.13	68.2962	55.2263	17.5653	0.948997
St-2-1_UTSTYST	1067.51	65.2035	55.258	17.6529	0.952536
St-2-1_UTYTTTY	745.602	40.7417	55.2905	15.8002	0.95818
St-2-1_YUYTYUT	1417.35	79.5586	55.2936	16.2317	0.957782
St-2-1_YYYSTST	1032.49	81.1276	55.2991	22.724	0.911031
St-2-1_YYUYTYS	1181.08	68.1976	55.303	16.699	0.949955
St-2-1_YYYSTUY	1179.48	79.4439	55.3162	19.4833	0.935762
St-2-1_USSYSUT	900.898	40.5645	55.3204	13.0255	0.971536
St-2-1_TSSYSUY	1037.73	45.6714	55.3247	12.7324	0.97259
St-2-1_TTUTTTU	766.951	40.2159	55.3448	15.1744	0.963221
St-2-1_TYUSTSS	1131.22	59.2828	55.3796	15.1731	0.960145
St-2-1_YSYSTSY	1120.5	72.9387	55.383	18.848	0.937679
St-2-1_YTYTTUS	894.637	33.8605	55.3835	10.9589	0.979202
St-2-1_TYTSTUY	946.934	51.9049	55.4126	15.8777	0.956029
St-2-1_UUTYTTS	898.964	45.0204	55.4645	14.5184	0.964763
St-2-1_UYYSTUS	1123.29	74.4193	55.5059	19.2182	0.936555
St-2-1_TSUSSUS	991.772	61.5655	55.5208	18.0108	0.943935
St-2-1_UYYTYYT	1169.57	43.4727	55.531	10.7864	0.980529
St-2-1_UTUUTUT	1013.54	49.1276	55.5461	14.0694	0.968714
St-2-1_UTYTTYT	778.482	38.9816	55.5737	14.5404	0.966092
St-2-1_SUYTYYT	1078.96	49.0539	55.5917	13.205	0.970372
St-2-1_UTUUTSU	825.837	37.0777	55.6031	13.043	0.97273
St-2-1_TYUSTST	996.719	48.3764	55.6179	14.1023	0.965707
St-2-1_UTUTTUS	1114.29	56.327	55.6697	14.6993	0.965284
St-2-1_STYTTST	877.394	55.2588	55.6867	18.3183	0.942264
St-2-1_YSSYTSY	1171.93	86.7205	55.6932	21.5251	0.921367
St-2-1_SSUYTTU	1291.15	83.1633	55.7355	18.747	0.944019
St-2-1_TUYUTUY	914.137	42.3831	55.8135	13.5109	0.970378
St-2-1_YSUSTTS	1296.59	80.5317	55.818	18.1002	0.94487
St-2-1_TUUSTYU	1058.02	81.3828	55.8199	22.417	0.919399
St-2-1_UTSUTSS	780.964	40.4111	55.8416	15.0845	0.963197
St-2-1_UTTSTTY	855.083	35.2275	55.8699	12.0154	0.975326
St-2-1_TYUSTYT	1153.02	54.8392	55.8706	13.8714	0.965852
St-2-1_TSSYUUU	978.621	80.498	55.877	23.9927	0.909583
St-2-1_TUUTTTT	839.636	54.977	55.9181	19.1101	0.943477
St-2-1_SYUSTTS	1220.33	77.5647	55.9222	18.5514	0.943008
St-2-1_USSYTYT	1031.04	79.5653	55.9265	22.5264	0.916622
St-2-1_TSUSTYU	1081.94	61.6366	55.9278	16.6286	0.951438
St-2-1_TTTYTTY	806.212	39.2035	55.9319	14.1949	0.966245
St-2-1_STYSTYU	930.317	68.7397	55.9428	21.5725	0.922053
St-2-1_UTTYTTY	934.711	32.481	55.9442	10.146	0.982782
St-2-1_USSSTSU	1003.3	55.3639	55.9623	16.1157	0.957672
St-2-1_TYUYTTY	973.037	47.1179	55.9848	14.1467	0.965587
St-2-1_STYTYSU	1112.59	60.6434	55.9852	15.9237	0.957484
St-2-1_TYSYTYS	930.95	73.6643	55.9853	23.1181	0.908667
St-2-1_UUTYTUT	918.152	56.8666	55.9963	18.0973	0.946998
St-2-1_SUYTTTY	778.477	32.3044	55.9969	12.1251	0.975174
St-2-1_TYYSTTS	1034.57	56.4905	56.0369	15.9638	0.956653
St-2-1_STYTYTY	1042.1	77.9049	56.0411	21.8575	0.924177
St-2-1_SSUYTTT	960.42	62.4686	56.0437	19.0194	0.936794
St-2-1_YUSSTUY	1170.61	95.2864	56.0814	23.8139	0.908616
St-2-1_TUUYSTS	823.492	29.883	56.0872	10.6174	0.981377
St-2-1_USSYTYY	900.492	66.4523	56.0895	21.5932	0.920929
St-2-1_TUSSTSY	902.559	63.5427	56.0942	20.6005	0.929354
St-2-1_TYTSTTT	925.918	65.7714	56.0985	20.7862	0.933496
St-2-1_SSTYTTU	1233.95	83.8403	56.1014	19.8841	0.940103
St-2-1_SYSSTYY	1015.01	71.3533	56.1417	20.5838	0.928056
St-2-1_TUYUTSY	838.792	39.5429	56.1475	13.8056	0.969007
St-2-1_YTTSTYS	1053.91	32.909	56.1664	9.14674	0.985969
St-2-1_TUYSTTS	1180.38	85.1753	56.1728	21.1395	0.928652
St-2-1_UTTSTUT	935.676	39.2562	56.1772	12.2914	0.974721
St-2-1_USTSTTY	919.503	43.944	56.1961	14.0053	0.967748
St-2-1_YUYSTST	1063.97	63.1111	56.2101	17.3862	0.947984
St-2-1_YSYTYYT	1148.49	66.7412	56.2127	17.0341	0.952284
St-2-1_STYSTTS	1005.53	68.775	56.2254	20.0526	0.932293
St-2-1_TUYUTUT	1018.6	48.0494	56.2292	13.8308	0.970419
St-2-1_TYSYTYU	974.647	54.712	56.2589	16.4653	0.954469
St-2-1_YUSYTSY	1021.28	83.98	56.2621	24.1226	0.90529
St-2-1_TTUTTUT	907.653	50.3395	56.2681	16.2705	0.957967
St-2-1_STTYTSS	1021	58.1863	56.2699	16.7192	0.954575
St-2-1_UUUSTYT	964.724	49.6332	56.2714	15.0938	0.963023
St-2-1_TUSSUST	874.257	46.1825	56.2724	15.4977	0.962418
St-2-1_YSTYTUT	1209.22	77.1222	56.2755	18.7124	0.943813
St-2-1_TTUUTUY	925.078	49.1055	56.2768	15.574	0.961834
St-2-1_USSSTYS	993.797	50.2155	56.277	14.8253	0.962165
St-2-1_SUSSTSU	899.885	77.6463	56.2803	25.3184	0.894822
St-2-1_YUYSSST	1129.88	86.2994	56.2849	22.4125	0.926147
St-2-1_TUYTSSU	830.846	41.6983	56.293	14.7289	0.966022
St-2-1_YTUYTYY	1049.4	52.3176	56.3015	14.6322	0.963645
St-2-1_SYUYTUS	1163.49	60.8277	56.3071	15.346	0.958903
St-2-1_USYSSUU	965.337	53.8278	56.313	16.3683	0.959239
St-2-1_TTTYTSY	827.709	36.7615	56.3314	13.0415	0.972156
St-2-1_UUUSUUT	1048.56	71.5621	56.3329	20.0406	0.937875
St-2-1_UTUSUST	1053.55	69.9191	56.3504	19.4931	0.942481
St-2-1_SUYTTUS	979.498	45.6943	56.3717	13.7064	0.969197
St-2-1_STSYTYS	893.378	47.5794	56.3726	15.6475	0.956137
St-2-1_UTSSUSU	931.76	61.7513	56.3938	19.4772	0.941759
St-2-1_TTSSTYU	883.242	32.1698	56.3982	10.7055	0.981298
St-2-1_TTYUTTS	877.723	45.4425	56.4011	15.2181	0.964009
St-2-1_SUYTTYU	731.366	54.3259	56.4029	21.8331	0.927154
St-2-1_STSYSUU	939.678	54.3591	56.4109	17.0062	0.953243
St-2-1_SUSYTSY	1018.05	65.4666	56.4137	18.905	0.93751
St-2-1_TUYTYUU	1213.96	45.9902	56.4168	11.1382	0.98029
St-2-1_TYSYSUS	979.539	76.1102	56.4176	22.8445	0.918987
St-2-1_UYSYTYT	980.383	40.5425	56.422	12.1592	0.974636
St-2-1_UUUSTSY	943.668	79.0718	56.4305	24.6425	0.902855
St-2-1_YUUSTSY	1172.88	66.8214	56.4438	16.7563	0.952493
St-2-1_TYTSTUS	1105.44	71.2498	56.468	18.9638	0.943001
St-2-1_TSSSTYY	1029.03	68.1277	56.4695	19.4796	0.938001
St-2-1_YUSYTUT	1368.92	91.1357	56.4706	19.5887	0.938735
St-2-1_TTUTTTT	827.391	45.9061	56.4764	16.3266	0.958616
St-2-1_STUUTUU	1037.29	71.4637	56.4811	20.2747	0.938622
St-2-1_YUYSTUU	1196.08	56.5441	56.4852	13.9126	0.967702
St-2-1_USYSTUU	1101.16	70.8895	56.4868	18.9461	0.940682
St-2-1_TUUYTYS	982.667	66.3271	56.492	19.866	0.936532
St-2-1_USTYTUU	994.137	50.0805	56.4969	14.8282	0.965271
St-2-1_YYUYTYU	1428.94	109.631	56.4973	22.5829	0.920144
St-2-1_SSSYYUT	1136.8	30.8249	56.5098	7.98302	0.989872
St-2-1_TTYTYST	1193.62	53.4663	56.5124	13.1879	0.973182
St-2-1_UUUYTYT	957.33	50.3732	56.5304	15.496	0.962986
St-2-1_TTUYUUS	941.932	50.9839	56.537	15.9415	0.959192
St-2-1_YUUYTUT	1227.29	99.7715	56.5458	23.948	0.907149
St-2-1_TSSYUUS	1120.3	52.9523	56.5466	13.923	0.969543
St-2-1_USUSTYT	1018.78	66.6796	56.5954	19.2937	0.936412
St-2-1_TTUSTSS	988.072	46.4492	56.599	13.8578	0.96687
St-2-1_YSUSUUT	1252.33	92.34	56.5993	21.7362	0.926109
St-2-1_YSSYTUU	1443.82	78.7982	56.6014	16.0886	0.957809
St-2-1_TUYTUUT	957.617	58.9869	56.605	18.1608	0.952153
St-2-1_USTSTUT	1083.91	64.4336	56.6401	17.5336	0.951883
St-2-1_TTSSSTS	869.954	37.7548	56.6433	12.8018	0.974304
St-2-1_TUUSUUU	1068.64	26.2432	56.6488	7.24458	0.99162
St-2-1_SYYSTST	1082.08	73.9858	56.6637	20.1743	0.933115
St-2-1_TUSYUUT	987.067	58.91	56.6817	17.6146	0.951008
St-2-1_UTTYTSU	779.436	44.6917	56.6853	16.9238	0.954301
St-2-1_STSYSSS	906.883	50.0109	56.6927	16.2783	0.956314
St-2-1_YTTYTUS	1122.73	71.6789	56.6931	18.846	0.943802
St-2-1_USUYTYS	988.644	66.8519	56.7042	19.9653	0.933025
St-2-1_UUTSTSS	950.087	34.7284	56.7178	10.7941	0.981694
St-2-1_YTTYTTY	1117.49	48.9463	56.7184	12.9339	0.973576
St-2-1_YYYSTSY	1057.09	83.0641	56.7227	23.2067	0.911143
St-2-1_UYYSTUU	1082.12	68.2821	56.7264	18.6354	0.944082
St-2-1_TTTYTTT	831.297	36.8044	56.727	13.0757	0.972656
St-2-1_YTYSTUU	1096.02	43.6985	56.7525	11.7793	0.977098
St-2-1_TUUSUTS	1012.81	49.7412	56.7548	14.5106	0.966795
St-2-1_STSYSTT	872.45	43.9674	56.7639	14.8917	0.964744
St-2-1_STUSSUT	1082.07	73.3376	56.7675	20.0282	0.935826
St-2-1_YTYTTUU	881.189	64.8844	56.7729	21.7602	0.92786
St-2-1_SUSYSUS	1155.84	62.6945	56.81	16.0388	0.959001
St-2-1_TTYTYYS	1061.02	64.2079	56.8267	17.8974	0.950098
St-2-1_SUSYTSS	977.136	60.9279	56.8954	18.4619	0.941439
St-2-1_USUSTSU	909.324	51.7424	56.9148	16.8511	0.95327
St-2-1_YTYSTUS	1330.72	89.38	56.9304	19.8955	0.936683
St-2-1_YTUSUUY	1181.06	87.8007	56.9322	22.0198	0.925655
St-2-1_USUYTYY	986.691	62.3398	56.9398	18.717	0.941418
St-2-1_UTSYTYU	827.708	47.621	56.9533	17.0474	0.952177
St-2-1_TUYTTUS	830.711	48.0714	56.9658	17.1498	0.95304
St-2-1_STUYTTY	1019.46	64.4301	56.9721	18.7314	0.940751
St-2-1_TYYSSUU	915.563	42.2483	56.9866	13.68	0.971445
St-2-1_USSYTYU	1079.43	56.5819	56.9939	15.5409	0.961277
St-2-1_YTUSTYS	1321.25	100.27	56.9945	22.5002	0.920157
St-2-1_UTYUTSU	760.982	32.9262	56.9979	12.829	0.972462
St-2-1_YUYTYYY	1091.52	70.192	56.9986	19.0663	0.943118
St-2-1_USUTTUT	937.694	31.478	57.0014	9.95371	0.984547
St-2-1_YTSYTYY	999.075	66.4805	57.0035	19.7307	0.936539
St-2-1_UTYTYTY	1052.79	43.8042	57.0042	12.3376	0.976294
St-2-1_USSSSTS	893.201	46.1563	57.0233	15.3272	0.964026
St-2-1_SUYTTUT	834.023	43.2538	57.034	15.3845	0.961581
St-2-1_SSUSUUS	1386.95	51.1942	57.0358	10.9503	0.98114
St-2-1_SUYTYYU	979.715	46.4373	57.0567	14.0658	0.9686
St-2-1_TTUTTST	833.878	56.5903	57.0759	20.1447	0.940616
St-2-1_TTTSTTT	886.801	38.2309	57.0776	12.7973	0.974333
St-2-1_TUSTTTU	759.565	43.1228	57.0814	16.8533	0.957784
St-2-1_UUSSTUT	1059.89	41.624	57.0863	11.6588	0.977759
St-2-1_STSYUTT	899.284	37.1008	57.1115	12.2526	0.97633
St-2-1_TTUYTYT	903.534	52.4292	57.1262	17.2369	0.952099
St-2-1_YSSSTUT	1239.9	79.6023	57.137	19.0737	0.941192
St-2-1_YTSYTSY	946.321	72.6292	57.1429	22.8057	0.912193
St-2-1_UTTYTUY	942.816	67.3027	57.1448	21.2095	0.92888
St-2-1_TYSSTYY	864.132	63.136	57.1535	21.7129	0.923631
St-2-1_SSUSTTT	1070.2	80.6286	57.1804	22.3989	0.919113
St-2-1_STUYTYY	1043.71	67.0615	57.2036	19.1076	0.940175
St-2-1_STYTYTT	1145.41	51.0681	57.2187	13.2619	0.973215
St-2-1_STTSTYT	1058.3	85.5635	57.2202	24.0492	0.913182
St-2-1_UTTYTUT	1068.72	49.74	57.2313	13.8464	0.970389
St-2-1_STYSSST	1016.91	57.8071	57.248	16.9159	0.95547
St-2-1_SSUYTUU	1132.85	85.4862	57.2495	22.4574	0.918674
St-2-1_SYUYTUT	1175.72	74.5176	57.2522	18.8615	0.941763
St-2-1_TTYUUST	744.112	40.7265	57.2556	16.2888	0.960773
St-2-1_UTYTUST	820.908	33.8611	57.2602	12.2766	0.976776
St-2-1_USYTYYY	999.828	46.064	57.2795	13.7159	0.96989
St-2-1_YTYTYYS	1204.07	73.9776	57.2815	18.2917	0.947681
St-2-1_TTYSTSY	896.428	67.0453	57.3181	22.2794	0.919661
St-2-1_STTYTUS	1123.23	72.5005	57.3249	19.2287	0.942223
St-2-1_TSTYTTT	1027.73	65.5017	57.3323	18.9878	0.945729
St-2-1_TUSYTST	975.326	65.9992	57.3362	20.161	0.933636
St-2-1_SSSSTUS	1395.9	67.6398	57.3443	14.439	0.966779
St-2-1_USUYTTT	922.943	46.8102	57.3771	15.12	0.962261
St-2-1_TTUTTUY	843.959	47.2414	57.3882	16.6907	0.957568
St-2-1_USUSSYY	927.292	50.7609	57.4486	16.3365	0.957828
St-2-1_UTTSSTS	777.413	34.2124	57.4753	13.1384	0.973707
St-2-1_USYTYYS	1178.26	69.521	57.4824	17.6172	0.952432
St-2-1_TSUSUUS	1231.03	51.3099	57.483	12.4452	0.976059
St-2-1_USYSTYY	884.432	51.0853	57.4955	17.2489	0.95107
St-2-1_USYSTST	1122.54	81.6456	57.5031	21.723	0.927588
St-2-1_YUYSTTU	1005.27	64.9839	57.5041	19.3068	0.940718
St-2-1_SUYTYYY	1085.05	70.2073	57.5077	19.3254	0.942244
St-2-1_TUSYSTU	853.997	37.3606	57.5139	13.0682	0.973385
St-2-1_YUYTTSS	922.758	49.4056	57.5357	15.9982	0.959324
St-2-1_UTYTYSY	1074.69	58.1119	57.5415	16.1588	0.959939
St-2-1_UTUSTYY	1034.21	73.0974	57.5564	21.1274	0.929124
St-2-1_TSTSTUS	1220.35	83.2688	57.5697	20.3987	0.937225
St-2-1_UUUYUTS	908.364	37.7408	57.5806	12.4229	0.976731
St-2-1_UYUYTSS	906.345	58.0364	57.5884	19.1481	0.940921
St-2-1_SSSSTTY	1025.66	71.0753	57.5971	20.7246	0.933738
St-2-1_YYSYTYS	1165.52	90.7994	57.6078	23.3041	0.912987
St-2-1_YSYTYYY	1365.02	77.0585	57.6222	16.8894	0.956219
St-2-1_UTYTSUS	1066.88	53.5752	57.6271	15.025	0.967058
St-2-1_STYUTUY	975.403	61.1489	57.6307	18.7581	0.946789
St-2-1_YSYTTST	958.394	60.4043	57.6317	18.8589	0.945494
St-2-1_UTUSTST	1010.02	60.9787	57.6342	18.065	0.946095
St-2-1_TTYTTUS	913.299	39.0161	57.6417	12.7845	0.974726
St-2-1_UUYTYUY	1310.84	58.1519	57.6477	13.2772	0.972998
St-2-1_UTSSTYT	899.259	39.5882	57.6498	13.176	0.97259
St-2-1_TSUYTYU	981.598	65.9608	57.6593	20.1144	0.935206
St-2-1_YSUSSYS	1109.62	74.1535	57.6888	20.0123	0.937307
St-2-1_STTSSUT	747.936	61.9703	57.6945	24.8136	0.908932
St-2-1_YTSSTTY	983.651	48.7035	57.6952	14.8285	0.964898
St-2-1_YTSYSTS	839.922	34.2699	57.7036	12.221	0.976144
St-2-1_SYSYTSY	1034.69	80.7085	57.7045	23.3651	0.912222
St-2-1_YUSYTYT	1014.46	55.8358	57.7057	16.4865	0.958123
St-2-1_TUYUTUU	904.335	53.7242	57.7171	17.7976	0.953767
St-2-1_YUUUTUY	1043.9	48.1188	57.7377	13.8135	0.970817
St-2-1_TSUUTYU	1007.95	54.6194	57.7402	16.2397	0.961662
St-2-1_SSYTTYT	799.871	44.2078	57.7527	16.5661	0.957902
St-2-1_TSUSTSY	1038.5	74.8999	57.7652	21.6213	0.926585
St-2-1_YTSYTTT	1040.66	67.7947	57.772	19.5316	0.939764
St-2-1_UUUTTTS	859.022	33.9635	57.78	11.8557	0.978997
St-2-1_UUYTTUY	816.813	59.2896	57.7979	21.7704	0.928252
St-2-1_UUUYUUS	1001.93	59.7464	57.8132	17.8892	0.953316
St-2-1_SYSYTYY	1028.38	80.8569	57.8174	23.5905	0.908971
St-2-1_TYYSTYU	910.714	60.4158	57.8175	19.9026	0.937209
St-2-1_STSSTTU	977.784	60.5258	57.8249	18.5732	0.946567
St-2-1_TSUSSYS	892.455	50.2553	57.8286	16.8967	0.954782
St-2-1_UUSYUUS	944.685	50.6107	57.8358	16.0773	0.960612
St-2-1_SSUUTUS	1150.47	52.8524	57.8431	13.7878	0.971124
St-2-1_TUYTUSU	723.37	36.7975	57.8513	15.2691	0.965253
St-2-1_SUYTTUY	856.54	34.4529	57.8639	12.0757	0.97641
St-2-1_YTSSTUT	1022.94	82.0677	57.8753	24.0903	0.912046
St-2-1_SSYTYUS	1310.97	61.7864	57.8857	14.1537	0.969174
St-2-1_YTYTTSS	904.788	56.2894	57.8984	18.686	0.944435
St-2-1_TYUSTTT	1067.6	60.2054	57.9009	16.9387	0.955263
St-2-1_TTYTYTU	1026.75	47.5771	57.9038	13.9192	0.971702
St-2-1_UTUSUTU	841.606	41.8977	57.9363	14.9611	0.966243
St-2-1_SSYTYYT	1150.78	55.5957	57.9576	14.5232	0.967727
St-2-1_TTUSTSY	892.552	58.1283	57.9589	19.579	0.938292
St-2-1_STSSTTT	969.564	39.7417	57.9635	12.3231	0.975637
St-2-1_YTYSTTT	1180.34	46.0434	57.9846	11.7311	0.978601
St-2-1_TUYTTUU	921.435	50.9276	57.9925	16.6227	0.958546
St-2-1_STTYTTY	852.182	46.4551	58.0017	16.3974	0.957463
St-2-1_TTUUTTT	811.223	52.7746	58.0083	19.5709	0.944549
St-2-1_SSUTTUY	1156.31	75.0121	58.0292	19.5207	0.94439
St-2-1_YTUYTTY	930.509	69.9018	58.0454	22.6119	0.919644
St-2-1_TUTYTSS	890.646	53.4599	58.047	18.0668	0.950259
St-2-1_TYYSUSY	815.404	54.2748	58.082	20.0445	0.94171
St-2-1_TYSSTSY	932.926	52.1867	58.0938	16.8482	0.955084
St-2-1_UTUYSUU	1013.77	57.7748	58.0971	17.1663	0.957543
St-2-1_TUSYTYT	856.128	51.0024	58.1204	17.9502	0.950832
St-2-1_UTYTTSU	814.788	29.208	58.1383	10.8041	0.981393
St-2-1_TYYTYUS	1336.6	55.5632	58.1539	12.5318	0.976143
St-2-1_SSSYTSY	965.734	78.1591	58.1584	24.4002	0.905319
St-2-1_TTYUTSY	719.593	39.3159	58.1668	16.4732	0.957339
St-2-1_SUTSTTS	918.013	49.7048	58.1675	16.3247	0.958512
St-2-1_UUUSUUU	1019.58	51.8681	58.1891	15.3428	0.965611
St-2-1_UYSYTUT	1107.72	54.3239	58.1945	14.7919	0.965666
St-2-1_UYYSTST	1022.24	80.5099	58.2146	23.7644	0.913971
St-2-1_TSYSTYU	850.698	67.2037	58.2223	23.8398	0.913262
St-2-1_STYTUSS	917.348	51.1058	58.2267	16.8117	0.957935
St-2-1_YSUSUYY	1033.72	65.7822	58.2399	19.2069	0.943166
St-2-1_SUUSTUU	1289.31	76.531	58.242	17.9161	0.94917
St-2-1_TTSYUSS	891.522	64.4302	58.2447	21.8142	0.928927
St-2-1_UTUSSTY	877.49	57.6104	58.2581	19.821	0.941676
St-2-1_TYYTYYY	1070.75	49.4299	58.2683	13.9389	0.970138
St-2-1_YUYTYSY	1172.32	81.9478	58.2698	21.107	0.933889
St-2-1_YUYUTUS	1026.45	55.2895	58.2725	16.265	0.961489
St-2-1_UUTSTUY	1030.9	40.3509	58.2952	11.823	0.978611
St-2-1_STYTYTU	1011.11	33.1579	58.3106	9.9079	0.985102
St-2-1_SYYTYYS	1297.4	95.2069	58.3147	22.1717	0.92777
St-2-1_TTSYSTT	790.188	44.1281	58.3244	16.8757	0.95754
St-2-1_SYYSTUS	1186.22	60.9452	58.3283	15.5261	0.962249
St-2-1_STYTTUY	955.113	49.563	58.3643	15.6899	0.962398
St-2-1_YSUYSYY	1046.95	70.1302	58.3689	20.2548	0.939717
St-2-1_SUYTTST	845.524	48.691	58.3769	17.4145	0.952584
St-2-1_YSSSTST	1102.43	47.6803	58.4054	13.0843	0.972917
St-2-1_YYUYTTY	1093.42	88.6293	58.4185	24.5276	0.911462
St-2-1_UTUSUYY	1020.64	60.0939	58.4237	17.8174	0.953603
St-2-1_YTYUTSS	961.264	42.4356	58.425	13.359	0.972533
St-2-1_TTYSTTU	903.568	45.3487	58.454	15.1938	0.964188
St-2-1_YUUSSUT	1368.61	63.026	58.4678	13.9443	0.971709
St-2-1_UTUUTTS	871.645	32.4349	58.4694	11.2677	0.981413
St-2-1_USYTTSU	745.024	33.414	58.4817	13.5831	0.972417
St-2-1_TUYUTST	819.015	58.6598	58.5079	21.6994	0.931689
St-2-1_UUTSTUS	991.644	39.9913	58.5091	12.2182	0.976992
St-2-1_YTTYTUY	993.93	49.1571	58.5187	14.986	0.964995
St-2-1_TUYTSTT	736.615	20.8932	58.5422	8.59782	0.98912
St-2-1_UUSSTYS	965.537	38.0308	58.5476	11.9402	0.97908
St-2-1_UTUSSSU	862.206	35.3797	58.5506	12.4395	0.976348
St-2-1_USYTTUT	1141.69	62.3122	58.5598	16.5475	0.961577
St-2-1_TTUSUUS	1042.36	35.8648	58.5733	10.4341	0.983545
St-2-1_TTTSTYT	833.902	41.5111	58.5772	15.0964	0.966148
St-2-1_USTSTTS	1142.31	63.4004	58.5876	16.8343	0.9596
St-2-1_STUSSST	1036.37	48.4377	58.5883	14.1763	0.969777
St-2-1_STYSTTU	942.35	70.5946	58.5906	22.7241	0.920607
St-2-1_TTTSTSU	749.806	34.2682	58.5991	13.8641	0.970041
St-2-1_TSUTTYT	907.288	35.9348	58.6007	12.0155	0.978156
St-2-1_UYUSTTS	1121.24	49.9261	58.6038	13.5085	0.971812
St-2-1_SYYSTSY	1066.82	81.1089	58.6074	23.0685	0.918505
St-2-1_STYYTSS	902.668	51.808	58.6089	17.4136	0.954996
St-2-1_STSYTST	1050.3	68.2222	58.612	19.7093	0.937323
St-2-1_UUUSSUU	953.459	35.5929	58.615	11.327	0.981272
St-2-1_UTYSTYS	981.047	73.182	58.6181	22.6342	0.923537
St-2-1_TTTSUSS	839.112	44.7498	58.6567	16.1914	0.962944
St-2-1_SSYSTSS	1110.66	67.4205	58.6591	18.4302	0.94783
St-2-1_USTSTYU	1006.85	53.1872	58.6792	16.0432	0.96192
St-2-1_SSUSUYY	1083.46	58.2393	58.6868	16.3263	0.959542
St-2-1_TTSUTTT	780.64	57.0992	58.6908	22.2186	0.934967
St-2-1_TTUTTUS	876.723	51.5056	58.6914	17.8447	0.952172
St-2-1_UUYTYUS	1356.76	69.3027	58.6952	15.5168	0.965947
St-2-1_TTYUTTY	707.23	39.4314	58.6995	16.9377	0.95822
St-2-1_TTSYSST	823.948	48.8776	58.7217	18.0258	0.952788
St-2-1_TTTSTST	840.192	38.6153	58.732	13.9685	0.970499
St-2-1_STUSTYU	1054.45	52.291	58.7366	15.0729	0.963583
St-2-1_UUYUTTU	820.883	51.9781	58.7368	19.2463	0.949416
St-2-1_TUSUTST	912.044	50.9923	58.7405	16.9951	0.96025
St-2-1_USTYTUY	898.022	56.2148	58.7566	19.0319	0.945917
St-2-1_UUSTTUU	918.566	72.1591	58.772	23.8878	0.924929
St-2-1_USUYUUS	1032.73	50.6766	58.7772	14.9235	0.967513
St-2-1_UUUSTSU	984.29	40.3911	58.7866	12.4813	0.976489
St-2-1_SSUSSUY	1109.55	63.806	58.7978	17.4937	0.953273
St-2-1_USYUTUS	937.723	49.6891	58.807	16.1213	0.962496
St-2-1_STSSUUY	1015.21	55.314	58.8088	16.5775	0.960112
St-2-1_YTTYTSS	920.34	100.522	58.8121	33.2347	0.850741
St-2-1_STYTTTY	845.454	43.2021	58.8126	15.5481	0.964281
St-2-1_TSSSTSY	912.356	55.0119	58.8135	18.3466	0.948587
St-2-1_UTTSTTS	901.363	51.5093	58.8173	17.3889	0.954849
St-2-1_YUSSTTY	1024.16	70.8679	58.818	21.0553	0.935065
St-2-1_TTSUTSU	769.593	45.2156	58.8227	17.8792	0.955705
St-2-1_TUUSUUY	1106.19	22.7309	58.8297	6.25395	0.994104
St-2-1_TUSYSSY	799.508	34.0719	58.863	12.9759	0.97468
St-2-1_YTUSTYY	1156.99	93.7587	58.8639	24.6759	0.907653
St-2-1_UTUTTTT	748.94	21.2957	58.8644	8.65819	0.988843
St-2-1_SUSSTTY	1016.7	64.1925	58.8684	19.2255	0.94386
St-2-1_UUYTTTS	800.505	35.0179	58.8717	13.3215	0.973924
St-2-1_TSSYUTU	863.73	55.2676	58.8723	19.485	0.946088
St-2-1_YUYTTTT	824.315	44.3125	58.8905	16.3745	0.961476
St-2-1_UTUUTTT	868.788	40.96	58.8923	14.3615	0.970865
St-2-1_STTSTTS	975.277	78.8367	58.8938	24.6233	0.912436
St-2-1_USSYSUS	964.411	59.3982	58.8963	18.7621	0.948114
St-2-1_STUSSUY	1137.01	69.8207	58.8988	18.707	0.947806
St-2-1_TYYSTTT	1114.32	57.094	58.9009	15.6093	0.964021
St-2-1_SUUTTUY	1100.95	67.656	58.9118	18.7244	0.948936
St-2-1_SUUSUUS	1213.17	81.3578	58.9212	20.4362	0.939206
St-2-1_SUTYTSS	1029.38	63.25	58.9217	18.7246	0.948878
St-2-1_TSYTTTS	847.439	34.9879	58.9278	12.5828	0.976688
St-2-1_YSUYTTT	1244.9	75.1422	58.9422	18.3991	0.949542
St-2-1_YUUSSUY	1183.28	89.6127	58.9464	23.0865	0.923515
St-2-1_STUSTSU	1166.48	83.5136	58.968	21.8331	0.927388
St-2-1_UTSYSTU	878.461	45.3313	58.9945	15.7416	0.964782
St-2-1_UTYUTUY	828.594	23.8999	58.9958	8.79896	0.988297
St-2-1_STYSSSS	941.478	74.3034	58.9998	24.0781	0.916019
St-2-1_USSSSSS	874.863	45.226	59.0043	15.7716	0.964536
St-2-1_YYSYTTY	888.236	72.1446	59.0105	24.7837	0.909326
St-2-1_TUSSUUS	1034.19	45.7956	59.0171	13.5124	0.9733
St-2-1_TTYSSUS	967.688	56.0902	59.0393	17.6921	0.955485
St-2-1_TUSSUSS	920.635	61.1266	59.0411	20.2667	0.942678
St-2-1_YUSSTTU	1021.95	47.8122	59.0458	14.2821	0.969715
St-2-1_USYTYYT	1046.1	38.8772	59.0659	11.3482	0.98088
St-2-1_YUUSTYY	1098.55	65.544	59.076	18.2212	0.949093
St-2-1_UTTYTYU	829.702	33.5432	59.0912	12.3488	0.977776
St-2-1_YYUSTYU	1335.26	109.468	59.0983	25.0467	0.906315
St-2-1_TTYSUSY	847.539	36.8482	59.1135	13.2847	0.97397
St-2-1_USUSSUS	1080.14	58.8907	59.117	16.6599	0.958032
St-2-1_TSUSUTS	1082.67	51.6361	59.1198	14.5744	0.969275
St-2-1_YTSSTST	1029.07	71.6381	59.1302	21.2772	0.931155
St-2-1_YYSYTSS	1050.54	83.513	59.1359	24.2988	0.910879
St-2-1_SYSSTUY	1149.23	60.7445	59.143	16.1573	0.960447
St-2-1_UTYSTYU	903.929	63.0456	59.145	21.3207	0.934076
St-2-1_TYSYTYY	982.264	75.5371	59.1451	23.5089	0.917887
St-2-1_TSSYSUT	1039.87	68.8004	59.1454	20.2254	0.941312
St-2-1_YSTSTUU	1240.99	57.5385	59.1458	14.1735	0.970232
St-2-1_YUUYSUY	1052.15	67.4699	59.1539	19.604	0.945271
St-2-1_TTTYTUU	857.89	58.6841	59.1548	20.913	0.937152
St-2-1_STYTYYT	1232.22	71.4749	59.1704	17.7379	0.954598
St-2-1_UYSYTSY	904.7	61.3355	59.1921	20.739	0.934141
St-2-1_UTTSTSY	832.063	52.6688	59.2055	19.3662	0.944476
St-2-1_YYTSTUT	1102.14	50.1913	59.2114	13.9338	0.97095
St-2-1_TSYUTUU	996.808	56.2659	59.2147	17.2721	0.958309
St-2-1_TTTSTTU	818.698	46.3842	59.2166	17.3365	0.95642
St-2-1_UTSYSTY	812.149	48.9673	59.2269	18.4521	0.949383
St-2-1_SYYTYYY	1308.53	69.2345	59.2437	16.1964	0.961466
St-2-1_YYUSTYS	1343.98	98.9862	59.2532	22.5498	0.922304
St-2-1_SUUSTSY	1058.26	62.4593	59.2539	18.0689	0.948509
St-2-1_SUTYTTU	1000.27	65.6686	59.2707	20.1031	0.943083
St-2-1_STUYTYU	953.986	48.0939	59.2907	15.4419	0.963108
St-2-1_SYSYTST	1069.19	76.8916	59.2976	22.0306	0.927156
St-2-1_YSUSSTT	1034.18	60.1865	59.3093	17.8312	0.954518
St-2-1_TUYTTTU	783.604	30.0059	59.313	11.733	0.980345
St-2-1_UTUUTUS	1043.65	51.0873	59.3144	14.9993	0.967748
St-2-1_TUUSSTT	912.95	36.511	59.3162	12.2544	0.977828
St-2-1_USYUTTY	784.81	38.8441	59.3365	15.1701	0.967221
St-2-1_UTYTTYU	757.852	34.0578	59.3463	13.7762	0.973032
St-2-1_TTYTTTT	712.626	21.7449	59.3631	9.35624	0.987163
St-2-1_SUYUTTT	871.133	44.385	59.3656	15.6229	0.96556
St-2-1_UTYSUSU	913.209	50.2027	59.424	16.87	0.959933
St-2-1_YUSSTUT	1173.87	68.9997	59.4275	18.0393	0.952064
St-2-1_SSYSTSU	1014.27	72.1526	59.4385	21.8362	0.928494
St-2-1_TSUSSTY	900.872	64.7232	59.4433	22.0532	0.930389
St-2-1_STSSTST	1040.09	48.2509	59.4588	14.2434	0.968011
St-2-1_YUYSSSU	947.014	42.7977	59.4597	13.8757	0.972579
St-2-1_TSYTTST	850.858	51.6476	59.4692	18.639	0.950839
St-2-1_STYUTST	952.879	54.2461	59.4751	17.4828	0.955707
St-2-1_SYUUTYS	1016.79	79.5951	59.4808	24.043	0.917603
St-2-1_USSYSUY	832.376	46.2154	59.5039	17.0573	0.956417
St-2-1_STYTTUU	868.74	55.6833	59.5079	19.6929	0.944343
St-2-1_SUYTYUU	1239.21	61.6301	59.5171	15.282	0.966136
St-2-1_TYYTTUY	857.626	65.2036	59.5171	23.3626	0.922506
St-2-1_YUSYTTT	1046.45	73.2834	59.5329	21.5231	0.932488
St-2-1_UTSYTYT	897.053	54.6693	59.5374	18.7316	0.947696
St-2-1_USYTYUY	1330.08	83.9103	59.5408	19.391	0.946974
St-2-1_UTYTYUT	1332.3	62.0289	59.5411	14.3109	0.970887
St-2-1_SYSYTUT	1068.95	55.1063	59.553	15.8484	0.960889
St-2-1_TYSSTTY	961.659	41.0839	59.5533	13.134	0.974286
St-2-1_TSYUTST	836.927	50.6607	59.5615	18.6115	0.952214
St-2-1_SSSYTUT	1132.54	76.2472	59.5716	20.7039	0.934135
St-2-1_YTSUTST	912.029	49.9478	59.5759	16.8417	0.961714
St-2-1_YTSSTTU	955.167	44.0824	59.5784	14.1933	0.970269
St-2-1_STUSSUS	1112.5	94.4857	59.5786	26.1217	0.901998
St-2-1_YTTSTUY	1085.52	60.7231	59.6089	17.2107	0.956321
St-2-1_SYYTSSU	836.329	57.3398	59.6161	21.096	0.939193
St-2-1_TYUUTTU	866.486	54.5423	59.6231	19.3709	0.950704
St-2-1_TTUSSUS	979.805	31.3724	59.6304	9.85431	0.985754
St-2-1_SYUTTYT	1147.96	56.0287	59.6313	15.021	0.968133
St-2-1_SSUTTTU	956.033	71.0628	59.6355	22.878	0.930707
St-2-1_STYTSSY	836.598	56.8168	59.6475	20.9055	0.936586
St-2-1_UYSSTSY	879.035	62.0074	59.6488	21.7158	0.930927
St-2-1_TSTYTYU	845.423	47.6947	59.6567	17.3686	0.955819
St-2-1_TUYTSST	826.691	60.3549	59.6568	22.4761	0.929782
St-2-1_TSUSTST	999.316	49.0893	59.6729	15.1267	0.965554
St-2-1_STYTTYS	947.77	54.3549	59.6776	17.6613	0.956038
St-2-1_STUYTST	1094.91	78.9247	59.6801	22.1993	0.927469
St-2-1_UTYTSUT	1037	48.8258	59.6813	14.501	0.970968
St-2-1_TTSYSTY	717.137	51.7704	59.6866	22.2345	0.928863
St-2-1_TSUYUSY	855.161	51.8552	59.704	18.6804	0.951426
St-2-1_YSYTYST	1248.6	62.2974	59.7113	15.372	0.966754
St-2-1_UUYSUSU	869.997	49.0634	59.7117	17.376	0.95962
St-2-1_SSSYTSU	967.212	62.4487	59.7281	19.8976	0.941689
St-2-1_STSYTTT	951.288	76.4782	59.7436	24.7819	0.908474
St-2-1_STSSSUS	1072.44	51.5302	59.7697	14.8162	0.968304
St-2-1_YSYTYUU	1589.06	61.1697	59.7707	11.8701	0.98035
St-2-1_TUUTTYS	847.757	38.964	59.776	14.1736	0.972014
St-2-1_UTYUTUU	814.731	33.0996	59.7811	12.5293	0.977361
St-2-1_TTYTTSY	843.803	49.4227	59.7868	18.065	0.952439
St-2-1_UTSYUTS	854.945	57.6916	59.7979	20.8159	0.939137
St-2-1_STYTTUS	1042.94	45.5147	59.8089	13.4637	0.974103
St-2-1_SUUSSUU	976.076	47.6043	59.8167	15.0483	0.966333
St-2-1_UTUYSUY	869.842	46.9792	59.836	16.669	0.959204
St-2-1_YSUSSTU	1102.5	53.0803	59.8898	14.8706	0.968827
St-2-1_SYUYTTS	1105.85	69.8057	59.8976	19.499	0.943814
St-2-1_TUUYSUS	962.077	39.6747	59.8997	12.7389	0.976471
St-2-1_YSSYSTY	879.174	45.3023	59.9231	15.9227	0.963422
St-2-1_TUUUTTY	834.832	22.0413	59.9298	8.15928	0.990625
St-2-1_YSSSSUS	1244.14	53.3719	59.9338	13.2581	0.975353
St-2-1_YTTSTUS	1043.07	62.3123	59.9379	18.4636	0.949668
St-2-1_USUSUUU	1104.92	56.6458	59.9419	15.8455	0.96504
St-2-1_UYUSUSS	1052.49	50.9737	59.9589	14.9732	0.969205
St-2-1_UUSSTTS	1015.04	90.4659	59.9814	27.5636	0.895304
St-2-1_TYUYTYT	1078.3	68.6064	59.9818	19.6769	0.94295
St-2-1_UTSYSUY	934.759	37.4879	60.0004	12.4056	0.97724
St-2-1_UTYTYYU	1046.26	51.603	60.0332	15.2639	0.967293
St-2-1_SUYSTSU	1181.75	61.9973	60.0659	16.243	0.96107
St-2-1_UYYTYTY	1038.93	47.4716	60.0739	14.1486	0.972233
St-2-1_SUYTYSU	1160.81	70.4921	60.0759	18.8036	0.950996
St-2-1_SSYTTUU	1093.93	54.9772	60.0858	15.5645	0.96681
St-2-1_YUYSTUT	1233.9	86.1511	60.0872	21.6245	0.932432
St-2-1_STUSUUY	1153.38	67.5315	60.0999	18.1368	0.952918
St-2-1_SYYSTSU	1063.5	83.4783	60.107	24.3181	0.914493
St-2-1_TUSYSUS	924.115	60.8685	60.125	20.4093	0.939977
St-2-1_SYSSTUS	1313.6	44.9923	60.1435	10.6161	0.983757
St-2-1_TSTYTYT	792.661	35.6966	60.1436	13.9582	0.970783
St-2-1_TYUYTYS	989.5	69.4331	60.1533	21.7527	0.930568
St-2-1_SYSYTYS	1079.39	83.9552	60.1601	24.1143	0.913666
St-2-1_SSSSTYS	1162.93	89.8084	60.1735	23.9468	0.918967
St-2-1_YYUSTSS	1306.12	69.1645	60.1774	16.4205	0.960379
St-2-1_TUUSUUT	1073.35	60.554	60.1787	17.4943	0.957111
St-2-1_TSSSSUY	1048.95	51.1428	60.1789	15.1192	0.967938
St-2-1_USYTTUS	963.706	45.8848	60.1809	14.7651	0.969355
St-2-1_TTTSTYS	923.094	74.3649	60.2222	24.9973	0.914103
St-2-1_TSYTYYU	1086.23	53.1622	60.2393	15.1895	0.967652
St-2-1_SSYTYUT	1479.98	63.0578	60.2516	13.2257	0.976138
St-2-1_TTYTYUY	1215.9	59.3475	60.2672	15.1536	0.967957
St-2-1_TTUSSSY	830.07	34.4005	60.2815	12.8693	0.976073
St-2-1_SUYTYSY	1156.15	56.1397	60.283	15.079	0.967235
St-2-1_TTYTTUY	870.582	56.5753	60.2948	20.1833	0.944077
St-2-1_USSSTYY	982.01	87.0441	60.3154	27.5402	0.895143
St-2-1_SSYTYSY	1097.2	61.1144	60.3516	17.3135	0.958149
St-2-1_UYUYTTS	978.991	58.7618	60.3663	18.6607	0.949565
St-2-1_SUUSSUT	1128.27	67.4766	60.3759	18.5955	0.951422
St-2-1_UUYTTUT	941.753	56.6666	60.38	18.7098	0.952204
St-2-1_UUYTYUT	1463.81	68.6295	60.3854	14.5796	0.971874
St-2-1_UTUSUUU	1090.95	40.3678	60.4078	11.5105	0.981683
St-2-1_TUUUTTS	902.013	39.3428	60.4087	13.5679	0.974611
St-2-1_YUYSSUS	1066.87	38.7403	60.4149	11.2969	0.982019
St-2-1_UTUTTSS	933.977	54.941	60.4271	18.3036	0.954068
St-2-1_YUUSTYS	1067.82	66.879	60.4518	19.4951	0.943947
St-2-1_YYUSTSU	1289.7	78.6034	60.4601	18.9718	0.949992
St-2-1_UTYTTTU	745.29	28.2031	60.4796	11.7831	0.980412
St-2-1_UYYSTYY	902.533	66.9171	60.4937	23.0926	0.922559
St-2-1_SYUYTSY	1001.61	78.5692	60.4985	24.4323	0.912793
St-2-1_SYUSSYS	1104.05	70.7378	60.5048	19.9565	0.942868
St-2-1_UTSSSUS	972.274	35.1325	60.5127	11.2565	0.981925
St-2-1_TTSYSUT	879.835	53.5577	60.5149	18.9633	0.949719
St-2-1_TSYTTSU	737.401	39.1475	60.5159	16.5386	0.961335
St-2-1_YUTYTTY	898.195	62.5453	60.5248	21.6953	0.934289
St-2-1_TUYTUSS	816.394	45.7092	60.533	17.4462	0.958662
St-2-1_UUSUTTT	819.683	55.2419	60.5342	21.0003	0.945418
St-2-1_UUYTTTY	748.608	39.0081	60.5413	16.2388	0.96336
St-2-1_USUUTTU	847.462	33.4398	60.5449	12.2977	0.979925
St-2-1_USYTYUT	1439.91	47.3341	60.5451	10.2451	0.985725
St-2-1_SSYTYYY	1236.67	61.532	60.5459	15.507	0.966123
St-2-1_STYSSUU	955.771	36.9886	60.5488	12.0616	0.979844
St-2-1_TSYTYUY	1290.65	76.4027	60.5523	18.4503	0.952746
St-2-1_YTUYTTS	1034.38	64.7049	60.5534	19.4969	0.944789
St-2-1_YUYTYUY	1599.01	83.123	60.5549	16.2032	0.964403
St-2-1_TUTYTTT	974.949	45.1967	60.5667	14.4516	0.971041
St-2-1_USYTYSU	1041.77	39.0827	60.568	11.6954	0.981052
St-2-1_TUUSSST	891.679	47.6362	60.5747	16.6564	0.962155
St-2-1_TYYTTUS	948.914	33.807	60.5811	11.1088	0.982502
St-2-1_TYSYUUY	955.046	55.0208	60.5853	17.9645	0.95522
St-2-1_YYSYTYU	1016.23	59.6849	60.5891	18.3148	0.95034
St-2-1_TTTSUTS	782.133	47.2589	60.5924	18.8429	0.95214
St-2-1_TYTSTTS	862.796	49.5489	60.5951	17.9099	0.954672
St-2-1_YTUSSUT	1092.98	85.3438	60.5991	24.3524	0.920313
St-2-1_SYTSTTS	1024.27	55.9881	60.6026	17.0489	0.960082
St-2-1_TUUSSTY	857.597	50.3063	60.6153	18.2983	0.952068
St-2-1_YUTSTTS	995.879	54.6493	60.6263	17.121	0.958879
St-2-1_TTSSSSS	875.207	41.7434	60.6396	14.8834	0.969786
St-2-1_STYTYST	1373.26	96.0962	60.6494	21.8394	0.936438
St-2-1_UTYSSUS	968.897	25.2828	60.6647	8.14578	0.990569
St-2-1_TUUSSUS	1133.82	70.0052	60.6761	19.2769	0.948433
St-2-1_SUUYTST	1162.12	62.0701	60.6783	16.6758	0.959835
St-2-1_STUSTYT	1387.54	87.1497	60.6785	19.6094	0.945364
St-2-1_SYUTTYU	1033.22	45.8303	60.6824	13.8499	0.973168
St-2-1_SYUYTYU	1048.43	79.2894	60.6945	23.6189	0.91873
St-2-1_TYYTYUT	1147.91	70.7666	60.7047	19.2541	0.949816
St-2-1_SUSYUUU	999.488	54.2958	60.7073	16.9677	0.960059
St-2-1_UUTUTUU	874.44	55.5402	60.7261	19.8446	0.951115
St-2-1_TTUTSSS	769.179	55.5544	60.7316	22.5667	0.935641
St-2-1_USUYSTY	898.403	39.1504	60.7433	13.618	0.974555
St-2-1_UYSYTUU	1052.99	50.7847	60.7477	15.072	0.966977
St-2-1_UTUSUTS	885.737	28.0922	60.75	9.91203	0.98592
St-2-1_UTSSUUY	980.91	55.5227	60.7524	17.6902	0.958481
St-2-1_STTSTUU	999.357	51.1744	60.7617	16.0059	0.963066
St-2-1_TYUSUUS	1184.5	61.0916	60.7617	16.1214	0.963926
St-2-1_UTUSUUY	1191.3	72.4098	60.7741	19.0012	0.950864
St-2-1_TSUTTUY	973.81	64.6453	60.7769	20.7532	0.940733
St-2-1_SUYTYTY	1222.01	66.93	60.7769	17.1233	0.960664
St-2-1_YTYTYSS	1292.97	61.9361	60.7865	14.9782	0.968686
St-2-1_TSUYTSS	962.646	57.6351	60.7903	18.7214	0.949236
St-2-1_SSUSTSS	1193.46	78.4631	60.7911	20.5588	0.939159
St-2-1_TUUYUUS	1039.91	61.7748	60.7951	18.5766	0.95276
St-2-1_STTSTYS	1034.32	63.4327	60.7962	19.1779	0.947459
St-2-1_SYYTTUY	855.231	68.8971	60.8152	25.2007	0.91508
St-2-1_USYTYYU	1076.07	57.8799	60.8221	16.8268	0.96119
St-2-1_UYUSSUS	1162.32	51.596	60.8431	13.8908	0.97329
St-2-1_YYYTYYT	1116.52	88.3995	60.848	24.7785	0.916451
St-2-1_YTYTYST	1410.81	66.7219	60.8515	14.8005	0.970349
St-2-1_YTYSTTY	1043.46	60.9254	60.8523	18.273	0.951823
St-2-1_SSTYTUT	1044.15	85.7867	60.8621	25.7178	0.908734
St-2-1_TSUYUUT	1060.36	63.8205	60.8682	18.8405	0.952049
St-2-1_YUYTYTT	1158.08	68.5361	60.885	18.5292	0.954575
St-2-1_SUSYSTS	969.064	62.7633	60.8893	20.2786	0.943405
St-2-1_TUUYTYY	1080.76	57.7362	60.8918	16.7272	0.962088
St-2-1_SYSSTSY	963.149	52.3682	60.8968	17.0263	0.957763
St-2-1_STUSYUY	1203.58	50.318	60.91	13.0943	0.976324
St-2-1_STYUTUS	1064.26	60.2137	60.9134	17.7213	0.958457
St-2-1_SSYTTUT	993.042	50.5044	60.9187	15.9311	0.965168
St-2-1_YSSYTYT	1106.58	82.5966	60.9473	23.3907	0.921011
St-2-1_TUYTUST	795.51	50.019	60.9511	19.7044	0.949563
St-2-1_TSSYSYT	936.146	31.5118	60.9518	10.549	0.984669
St-2-1_YYYTYUY	1451.43	73.0078	60.9599	15.7649	0.966668
St-2-1_TYYTTUT	972.966	44.7216	60.9822	14.4104	0.971979
St-2-1_TSUSSYY	922.063	58.8029	61.0092	20.0002	0.944623
St-2-1_UTUYTST	1053.34	59.8212	61.017	17.8134	0.956164
St-2-1_YTTYTTS	962.086	59.5659	61.018	19.4199	0.947886
St-2-1_TYUSSUY	959.464	66.238	61.026	21.6574	0.933484
St-2-1_SUTYTUY	1179.07	54.4208	61.033	14.4804	0.970727
St-2-1_TTUSUUY	1056.1	58.4423	61.0366	17.3613	0.959387
St-2-1_YTUSYUS	1369.86	34.6973	61.0397	7.94723	0.991486
St-2-1_UUUSTYY	857.101	50.3667	61.0442	18.438	0.951861
St-2-1_SSUYTYY	1114.19	95.415	61.0495	26.8751	0.900907
St-2-1_SUUSSUS	1112.61	46.9847	61.0501	13.2514	0.97479
St-2-1_UTUUTUU	992.482	36.4656	61.0541	11.5304	0.98229
St-2-1_USTSTUU	1066.94	70.9131	61.0585	20.8584	0.943275
St-2-1_UUUSSTS	890.726	41.2415	61.0776	14.5347	0.971154
St-2-1_TSUYYTU	1038.51	45.5194	61.095	13.763	0.97587
St-2-1_UYSYTTS	962.328	63.3602	61.0991	20.6752	0.939069
St-2-1_YUYTTST	954.957	50.8002	61.1103	16.7067	0.961571
St-2-1_TSUSUYT	943.131	41.8347	61.1175	13.932	0.972924
St-2-1_YUYTYYU	978.896	33.0869	61.1287	10.6179	0.984372
St-2-1_YSUTTUU	1114.85	83.8738	61.1295	23.6328	0.926345
St-2-1_STUUTUS	1006.2	57.5525	61.1306	17.9683	0.956324
St-2-1_YSUYTYS	1204.59	82.857	61.1363	21.6106	0.932544
St-2-1_SUTYTTT	993.9	61.4379	61.1643	19.4276	0.948902
St-2-1_SUTSTUU	1126.15	59.2736	61.1726	16.544	0.962709
St-2-1_SYSYUTY	981.044	84.5843	61.178	27.1018	0.907375
St-2-1_YUTYTUT	1016.46	46.7648	61.1786	14.4622	0.970952
St-2-1_TYTYTYY	935.616	56.5373	61.187	18.997	0.951438
St-2-1_UUTYTTY	872.097	49.6754	61.1877	17.9077	0.95654
St-2-1_YUSSTSS	1052.02	65.5495	61.2042	19.5928	0.945713
St-2-1_TYYTYTS	1150.45	60.402	61.2082	16.5106	0.964247
St-2-1_STYSTYY	1021.85	61.0694	61.2143	18.7945	0.949494
St-2-1_UUSSUTU	917.214	47.8544	61.2173	16.4095	0.966174
St-2-1_USUYTSS	938.177	46.5584	61.2213	15.6086	0.964763
St-2-1_UTUUTSS	954.821	51.9119	61.2226	17.1008	0.962103
St-2-1_UUSSTST	1000.13	52.4099	61.2229	16.4826	0.963441
St-2-1_UYSYTST	948.873	64.1237	61.2358	21.2586	0.936086
St-2-1_TTTUTST	890.452	66.3362	61.2479	23.4397	0.934806
St-2-1_YTYTYYT	1193.34	48.3527	61.2612	12.7511	0.978079
St-2-1_TUTSSSS	908.091	50.014	61.2641	17.3325	0.961657
St-2-1_TYUYTTT	1011.72	48.1202	61.2649	14.9686	0.968564
St-2-1_SUUYUTU	1102.73	77.1755	61.2722	22.0262	0.939087
St-2-1_USSYTSY	891.66	66.3908	61.2921	23.4432	0.922281
St-2-1_TTSSSSY	894.501	46.8286	61.301	16.4833	0.964053
St-2-1_UTSYSUT	1019.87	44.8591	61.3042	13.8501	0.973728
St-2-1_TSUSYUY	1328.14	75.5454	61.3097	17.9116	0.957986
St-2-1_TSYTTSS	822.579	51.1645	61.3099	19.5871	0.948308
St-2-1_UTUYSUS	1063.44	46.02	61.3109	13.6277	0.974799
St-2-1_SYUSTTU	1152.02	82.5797	61.3221	22.5774	0.929515
St-2-1_YTTSTYU	936.957	52.2402	61.3228	17.5605	0.957987
St-2-1_STTSTUS	1151.2	68.6486	61.3248	18.7819	0.950724
St-2-1_SUUTTSY	932.654	70.6303	61.3305	23.8539	0.926431
St-2-1_TUTYTTU	923.226	68.7365	61.3351	23.4527	0.929832
St-2-1_SYYTTYY	826.402	45.357	61.3492	17.2925	0.95794
St-2-1_STSYSUT	1007.81	60.3218	61.3611	18.8603	0.951833
St-2-1_UUSYUTS	905.409	57.6909	61.3742	20.0817	0.946878
St-2-1_UYSSTTY	1019.66	47.3751	61.3768	14.6441	0.970863
St-2-1_SUUYTSS	1068.36	69.6719	61.3831	20.5554	0.940695
St-2-1_SUUYTYS	1182.67	87.3669	61.4048	23.292	0.92758
St-2-1_YTSYTSS	957.713	82.3062	61.409	27.1007	0.896908
St-2-1_SUUSTYS	1084.65	76.0992	61.4112	22.1248	0.929562
St-2-1_UTSYYUY	1068	50.5217	61.4294	14.9205	0.970228
St-2-1_TUTSTTT	1018.66	49.523	61.4342	15.3343	0.968538
St-2-1_TSUSUTU	938.939	23.7378	61.4352	7.97476	0.99135
St-2-1_UYYTYUU	1173.54	63.7488	61.4357	17.1346	0.960882
St-2-1_YYYSTTU	1136.02	79.1983	61.4478	21.9943	0.935381
St-2-1_YUYTYUS	1518.18	77.5904	61.4697	16.1283	0.965617
St-2-1_SSSYTTT	1029.29	67.4763	61.4782	20.6913	0.938901
St-2-1_TSTSTTU	976.928	44.2515	61.4905	14.2988	0.972427
St-2-1_UUTSTTU	822.872	55.4421	61.4918	21.2679	0.940887
St-2-1_TUTSSTT	903.553	51.8935	61.4971	18.1311	0.958832
St-2-1_UTYTSTT	853.378	44.388	61.4972	16.4203	0.965746
St-2-1_UTYSUSY	856.131	58.3602	61.5243	21.5274	0.938153
St-2-1_STSSTSY	1053.23	98.4491	61.5316	29.5247	0.882314
St-2-1_TTYSTYY	880.525	55.5726	61.5472	19.9378	0.945326
St-2-1_TTUSSUT	938.563	64.3596	61.5543	21.6657	0.937062
St-2-1_UTUUTTU	899.438	54.2651	61.5705	19.065	0.95498
St-2-1_TSTSTYU	911.708	62.4034	61.5744	21.6304	0.937132
St-2-1_TSSYSTU	798.74	51.6278	61.5772	20.4264	0.944584
St-2-1_STUYSSY	947.082	49.0243	61.5884	16.3616	0.963566
St-2-1_SYUSSUT	1105.87	69.2962	61.5965	19.8087	0.946975
St-2-1_TTYSTYU	865.786	61.4092	61.6077	22.4249	0.933235
St-2-1_YUYTYSU	1250.84	72.7589	61.6142	18.3925	0.956233
St-2-1_YSUSSUS	1253.04	79.4685	61.6174	20.0534	0.94521
St-2-1_TSYTYYT	1073.29	64.6416	61.6182	19.0439	0.951503
St-2-1_STYUTTU	902.202	51.2772	61.6221	17.9733	0.959527
St-2-1_UTYSSST	941.524	54.1187	61.6247	18.1765	0.956457
St-2-1_USUYSUT	933.753	48.8774	61.6301	16.5542	0.963898
St-2-1_TYUYTYY	906.314	68.7616	61.6353	23.9978	0.919891
St-2-1_YTYTTST	975.465	72.307	61.6389	23.4457	0.927522
St-2-1_UUYSTSU	984.515	47.1352	61.6567	15.1468	0.96802
St-2-1_TSTYTTY	869.618	53.6248	61.6691	19.5115	0.947714
St-2-1_UTUTTUU	937.205	38.5915	61.6763	13.0304	0.977537
St-2-1_USUYUTS	934.563	57.7431	61.6855	19.5542	0.950125
St-2-1_UTTSSSS	926.096	63.1713	61.6994	21.5929	0.942735
St-2-1_SUYTYYS	1144.61	84.3048	61.7021	23.3161	0.929514
St-2-1_USYSTTT	974.113	56.423	61.7128	18.3386	0.952363
St-2-1_SUUYTYY	1088.5	64.5032	61.7163	18.7624	0.951115
St-2-1_UTTSTTT	868.347	42.1152	61.7284	15.3585	0.968476
St-2-1_SUYTYUT	1279.68	82.1875	61.7297	20.339	0.945205
St-2-1_UTYTYST	1247.46	65.5727	61.7336	16.6475	0.964328
St-2-1_USUUTYS	933.59	42.6851	61.7355	14.4804	0.971854
St-2-1_UYYTYSS	1034.6	57.8713	61.7359	17.7146	0.957802
St-2-1_UUYTTUS	885.301	48.529	61.7538	17.365	0.95948
St-2-1_YTUTTUT	1154.95	69.8194	61.7616	19.1526	0.953928
St-2-1_STSTTUY	1022.25	49.0962	61.7617	15.2154	0.969594
St-2-1_TYUSTSY	1021.62	49.6688	61.7734	15.4052	0.966549
St-2-1_UTYTSSY	804.576	47.1147	61.7848	18.5574	0.953913
St-2-1_YTYUTSY	877.557	60.4948	61.8009	21.8525	0.935559
St-2-1_YYSYTYT	1148.8	90.6594	61.8023	25.0183	0.91556
St-2-1_TTUTTYS	738.973	55.106	61.8213	23.6432	0.926257
St-2-1_UYYTYTU	973.555	41.5198	61.8239	13.5227	0.976197
St-2-1_UYTSTYS	1105.53	63.2803	61.8677	18.1604	0.955528
St-2-1_TUTSTSS	951.131	46.7186	61.8767	15.5858	0.967249
St-2-1_STSYTYY	968.005	45.8041	61.8783	15.0142	0.966872
St-2-1_TUSSUTS	1034.13	40.55	61.8885	12.4437	0.980335
St-2-1_UTUTTTS	902.611	42.7388	61.918	15.0325	0.970629
St-2-1_TUYTYYS	1000.62	64.2455	61.9232	20.3851	0.946064
St-2-1_TYUSSTT	944.325	53.7143	61.9236	18.0597	0.957903
St-2-1_TTUYTYY	858.547	54.7131	61.9249	20.2339	0.943996
St-2-1_SYYTYSS	1198.48	71.6421	61.9374	18.9829	0.953424
St-2-1_TSSTTSU	791.208	60.7471	61.9393	24.3827	0.927685
St-2-1_SUUSSUY	1118.16	78.108	61.9412	22.1848	0.93384
St-2-1_SUUSYUY	1375.22	83.8157	61.9435	19.3561	0.952282
St-2-1_TSUSTSS	1188.94	77.4268	61.9679	20.6882	0.942764
St-2-1_TTSSTYT	916.874	61.14	61.9784	21.1869	0.939574
St-2-1_UTYSSSY	880.619	48.9384	61.9798	17.6579	0.958298
St-2-1_TTTUTSY	753.382	43.3507	61.981	18.2841	0.95918
St-2-1_YTSYTSU	931.337	61.4605	61.9818	20.9703	0.939203
St-2-1_TUTYTTS	927.427	59.8153	61.9847	20.4937	0.943914
St-2-1_YUSSTST	1005.76	52.924	61.9917	16.7226	0.960863
St-2-1_YSSSTTY	1223.12	55.9869	61.9966	14.5477	0.972032
St-2-1_TTSYSUU	892.015	57.2375	62.0006	20.3939	0.946385
St-2-1_SSUYTTY	1054.72	73.4084	62.0136	22.1259	0.930611
St-2-1_SYUYTTU	1010.49	82.8962	62.018	26.0816	0.909009
St-2-1_TTUSSST	834.285	60.9455	62.0295	23.2258	0.930063
St-2-1_STTSTSS	1146.79	71.6967	62.0339	19.8795	0.946895
St-2-1_YYTSTYT	1167.25	76.8806	62.0351	20.9428	0.941536
St-2-1_STUTTUT	1055.22	52.9055	62.0632	15.9484	0.966305
St-2-1_YTUUTUU	1078.16	57.4131	62.0642	16.9394	0.963923
St-2-1_UTYTYYY	1038.48	50.1465	62.0716	15.3622	0.968687
St-2-1_UUUSTYS	953.589	58.1213	62.0783	19.3914	0.9492
St-2-1_YYUYTSY	1145.53	86.9093	62.0809	24.1403	0.921297
St-2-1_UUUYTSY	882.004	55.6902	62.0855	20.0913	0.945399
St-2-1_TUUSSTU	928.268	48.4246	62.0907	16.5998	0.964372
St-2-1_TUYTTYU	792.95	49.7945	62.0918	19.9829	0.951099
St-2-1_UTYSTYT	934.093	47.3604	62.1002	16.136	0.964778
St-2-1_SSSYTYT	994.818	61.0344	62.1031	19.5272	0.945479
St-2-1_TTSSUSS	936.827	55.8042	62.1095	18.959	0.953693
St-2-1_TTYUYUY	1030.76	58.2237	62.1162	17.9799	0.960933
St-2-1_TTSYYTT	985.145	42.8789	62.1309	13.8577	0.976041
St-2-1_TYSYTST	875.701	62.4577	62.1315	22.7095	0.929721
St-2-1_YSYTTSS	1025.35	40.0361	62.1347	12.4324	0.979351
St-2-1_UTTTTUU	844.774	49.3709	62.146	18.6111	0.95756
St-2-1_YUYUTUU	961.591	53.2229	62.1533	17.6271	0.960299
St-2-1_STUSUTT	1044.35	52.0479	62.1541	15.8724	0.966832
St-2-1_YUUSSUS	1177.55	81.9717	62.1551	22.1701	0.935793
St-2-1_TTUSUYS	1079.07	50.5981	62.1631	14.9356	0.97129
St-2-1_SUYTYSS	1251.12	67.916	62.191	17.2962	0.960218
St-2-1_TSYTTTU	787.129	38.359	62.1975	15.5295	0.968083
St-2-1_UTSYUTY	953.985	43.094	62.2055	14.3966	0.97275
St-2-1_SSYSTTU	1019.32	61.0114	62.2175	19.0788	0.951466
St-2-1_YUUYTTU	1161.6	43.7787	62.2175	12.013	0.98028
St-2-1_UTYTYTS	1107.45	51.4138	62.2231	14.7987	0.971282
St-2-1_USYUTSU	824.264	41.828	62.2547	16.1832	0.966639
St-2-1_TSSSUTY	867.906	34.4964	62.2591	12.6764	0.978923
St-2-1_YYYSTTS	1155.95	66.7357	62.2635	18.4125	0.955112
St-2-1_TSUSUUY	1043.11	35.0283	62.2646	10.7105	0.984311
St-2-1_SUYTSUU	958.49	56.1678	62.2727	18.6925	0.956332
St-2-1_UTSTTUS	916.147	47.7475	62.2802	16.6259	0.964415
St-2-1_STYUTTS	707.451	52.2787	62.2804	23.5735	0.928431
St-2-1_TSYSTYS	1029.82	56.596	62.2927	17.5346	0.957162
St-2-1_TUTYTTY	813.027	46.4881	62.3018	18.2462	0.953944
St-2-1_SUTSTUY	1003.64	51.7286	62.3082	16.4484	0.962339
St-2-1_YYTSTYS	1221.34	68.5181	62.3438	17.9121	0.957541
St-2-1_UTSTUSS	848.114	58.9588	62.3496	22.198	0.942466
St-2-1_STYTSST	953.375	62.969	62.3623	21.0929	0.943634
St-2-1_UTSSUUS	998.551	46.7336	62.3637	14.947	0.970797
St-2-1_TYYSTSS	1073.61	68.5153	62.3824	20.3856	0.944818
St-2-1_YSYTYSS	1269.45	66.4005	62.3827	16.7086	0.963623
St-2-1_YTYSUSS	1020.38	44.4969	62.3837	13.9303	0.974859
St-2-1_TUSYSTS	915.742	53.1443	62.3848	18.5395	0.954239
St-2-1_TSSTYUT	985.236	36.8594	62.3977	11.9535	0.982233
St-2-1_TUUYUTT	952.68	37.1806	62.4064	12.4712	0.980114
St-2-1_TUUUTUT	993.985	41.1035	62.4262	13.2174	0.977356
St-2-1_STYUTUT	858.293	53.8248	62.4296	20.0449	0.947242
St-2-1_TSUYTST	950.961	55.1871	62.4398	18.5519	0.953458
St-2-1_TUUYSUU	887.028	67.7748	62.4443	24.4273	0.925382
St-2-1_STYSTST	1230.01	55.8509	62.4481	14.5174	0.969871
St-2-1_STSYYTY	905.368	45.5114	62.4536	16.0729	0.966393
St-2-1_STUSSSS	1069.07	56.472	62.4554	16.8907	0.961832
St-2-1_YUSYYUY	1170.27	79.7849	62.4564	21.8001	0.94115
St-2-1_UTYUTUS	913.568	55.4682	62.4604	19.4149	0.950521
St-2-1_UUTSTST	845.148	33.5015	62.4661	12.6768	0.979276
St-2-1_TUYSTYS	870.31	78.3921	62.4862	28.8156	0.893749
St-2-1_TYYSTST	1025.24	84.2572	62.4987	26.2944	0.911342
St-2-1_TTYTSST	767.112	38.7517	62.5093	16.1645	0.965797
St-2-1_YUUSTSS	1330.91	89.608	62.5095	21.5436	0.939349
St-2-1_UUTSTTT	848.181	44.0686	62.5125	16.6255	0.964527
St-2-1_YUTYTTS	981.651	45.2462	62.5193	14.7506	0.971186
St-2-1_UTUTTUY	1022.48	43.1587	62.5263	13.5093	0.976438
St-2-1_YSTYTYS	1106.34	47.8953	62.5352	13.8573	0.97375
St-2-1_UTYUTUT	826.888	51.011	62.5352	19.7461	0.948461
St-2-1_TYSSSUY	926.54	56.9711	62.5489	19.6852	0.949222
St-2-1_SSYSSUS	1044.83	53.418	62.5606	16.3708	0.966201
St-2-1_TTUSUTT	1059.86	46.7507	62.5629	14.1244	0.975483
St-2-1_TTYUTTU	699.802	23.7341	62.5683	10.861	0.98477
St-2-1_YYSYTSU	1073.74	72.7282	62.5701	21.6905	0.937873
St-2-1_TSSTTUY	816.969	34.7552	62.5806	13.6255	0.975472
St-2-1_YTYTYUT	1487.14	66.9615	62.5854	14.4224	0.973642
St-2-1_TUSYSTT	887.783	46.5854	62.5962	16.8101	0.962833
St-2-1_STSYYUY	1003.34	52.1281	62.6218	16.6487	0.963571
St-2-1_UTYTUUS	926.665	55.2549	62.6283	19.1102	0.955669
St-2-1_YTTSTUU	1035.89	69.2262	62.6446	21.4215	0.940221
St-2-1_YTYTYSU	1238.46	41.7166	62.6453	10.7979	0.984792
St-2-1_TSTSTYT	854.272	44.0346	62.6521	16.5251	0.962304
St-2-1_TUUSSUT	1050.16	44.6119	62.6553	13.6194	0.97507
St-2-1_UUSYUTT	832.805	49.8899	62.6565	19.2058	0.952954
St-2-1_STYTYTS	1160.35	48.5105	62.6593	13.4042	0.976853
St-2-1_TYYSTYS	964.454	70.4182	62.674	23.415	0.925941
St-2-1_STUSYTS	1094.58	81.4634	62.6746	23.8666	0.930073
St-2-1_UTTSTSU	910.687	37.6782	62.679	13.2685	0.977248
St-2-1_TTUTSSU	639.911	35.7334	62.6818	17.9086	0.961075
St-2-1_UTYTSST	928.279	63.9152	62.6912	22.0848	0.939626
St-2-1_UYTSTYT	970.325	50.9041	62.7035	16.8297	0.962337
St-2-1_UTTSTST	932.72	31.6122	62.7077	10.8736	0.984736
St-2-1_YTYTTYS	816.772	47.6534	62.7223	18.7217	0.954509
St-2-1_SYYTYSU	1185.08	44.0971	62.7224	11.9402	0.981851
St-2-1_TUUYSTU	794.415	32.1115	62.7325	12.9725	0.978731
St-2-1_STSYSUS	1038.59	63.4685	62.7435	19.6144	0.949566
St-2-1_SUUUTTT	902.985	47.1822	62.7647	16.7758	0.964739
St-2-1_TTUUTTU	815.953	40.2286	62.7654	15.8297	0.969823
St-2-1_YTUSUUS	1187.35	61.8804	62.7711	16.7341	0.963218
St-2-1_SUUUTUY	1049.23	51.2034	62.7856	15.6727	0.968155
St-2-1_TSUSUUT	1273.91	58.0469	62.7874	14.6337	0.973043
St-2-1_YUSSUST	1113.13	78.7318	62.7942	22.7181	0.93876
St-2-1_TSSYSYS	943.23	41.4105	62.7947	14.1013	0.973908
St-2-1_TSSSTSU	939.159	74.1116	62.8092	25.3523	0.917832
St-2-1_YYSYTSY	1022.23	93.2991	62.8106	29.3245	0.887036
St-2-1_UUUSUUY	1048.77	40.5975	62.8207	12.4376	0.980123
St-2-1_TSTYTTS	993.764	41.1999	62.8231	13.321	0.976319
St-2-1_TSTSTYS	993.306	54.28	62.825	17.5587	0.958143
St-2-1_YTYUSSY	933.161	36.3061	62.8276	12.5021	0.980477
St-2-1_SYTSTYU	1116.74	76.974	62.8394	22.1516	0.936612
St-2-1_UUSYSTT	798.598	39.4812	62.8473	15.8902	0.967129
St-2-1_STSYUUS	1059.61	57.4823	62.8496	17.4367	0.959845
St-2-1_SUUSYUT	1277.31	94.687	62.8816	23.8373	0.930272
St-2-1_USSTTUU	994.181	72.5789	62.8895	23.4777	0.93597
St-2-1_TTYUTUU	887.597	44.35	62.8922	16.0694	0.968094
St-2-1_UTSYSST	845.057	56.2461	62.8955	21.4059	0.942877
St-2-1_TUSYTYU	759.482	47.5238	62.9156	20.13	0.947236
St-2-1_UUTSTUU	1022.29	50.8732	62.9157	16.009	0.967798
St-2-1_YUYUTUY	967.349	44.0441	62.9316	14.6505	0.972153
St-2-1_TSYTTUS	1027.26	42.9468	62.9336	13.4528	0.976754
St-2-1_UTUSSTU	939.492	37.3966	62.9404	12.8095	0.979195
St-2-1_UTSYUTU	808.747	40.1075	62.9506	15.9613	0.967154
St-2-1_TUUYUUY	1035.92	76.7879	62.9582	23.8594	0.929445
St-2-1_TTTTSSU	570.187	52.5088	62.9615	29.643	0.904421
St-2-1_YSUYTTS	1237.06	88.9216	62.9627	23.1396	0.930067
St-2-1_SUSSSUS	1179.62	68.3396	62.9719	18.6506	0.956395
St-2-1_TTYTYSS	1145.89	52.2279	62.9734	14.6736	0.97249
St-2-1_TTYTTSS	780.61	50.0226	62.9861	20.6334	0.944112
St-2-1_SSSSTTT	1069.54	56.4142	62.9926	16.9858	0.962752
St-2-1_TUYTYTY	1318.74	66.1951	62.9967	16.1654	0.968341
St-2-1_TTYTTYS	764.738	35.1999	63.0009	14.8243	0.971887
St-2-1_UYTYTYY	913.195	53.1597	63.0064	18.7496	0.953964
St-2-1_TTSTTUS	873.756	40.3027	63.0077	14.8567	0.972389
St-2-1_YYYSTUS	1229.26	79.0887	63.013	20.7258	0.943915
St-2-1_TSYTTTY	820.818	30.2178	63.0173	11.8588	0.981764
St-2-1_TUSSTYS	1087.95	71.8124	63.0197	21.2629	0.943485
St-2-1_TSUSUYY	912.453	53.7973	63.0331	18.996	0.952352
St-2-1_UTTSSUS	948.852	42.1078	63.0461	14.3005	0.973966
St-2-1_TUTSSUS	921.102	59.4048	63.0468	20.7828	0.946938
St-2-1_UTSYUUY	890.971	45.5736	63.0517	16.4847	0.964453
St-2-1_YSSYTST	1218.27	72.5693	63.0617	19.1997	0.951446
St-2-1_UUUSUTT	963.757	46.7848	63.0689	15.6484	0.970191
St-2-1_UTSTTUY	818.437	35.4995	63.0801	13.9836	0.975125
St-2-1_TUYUTUS	894.432	32.0103	63.0805	11.5382	0.98265
St-2-1_UTUSSUY	1045.86	58.3711	63.0939	17.9962	0.957667
St-2-1_TSYTTUT	938.879	43.4918	63.1012	14.9387	0.971315
St-2-1_USYTTSY	733.771	45.2449	63.1103	19.8869	0.947968
St-2-1_SUYTTSS	840.91	48.4705	63.1395	18.5973	0.953421
St-2-1_TYSYTSU	870.255	66.0233	63.1403	24.4795	0.92206
St-2-1_TUYTUUU	811.491	42.96	63.1445	17.0822	0.964561
St-2-1_UUSSUTT	884.712	36.4355	63.1457	13.289	0.978241
St-2-1_SSSSTUT	1240.29	67.4819	63.1464	17.5555	0.959205
St-2-1_STUTTUU	1027.73	42.3379	63.1518	13.294	0.977365
St-2-1_YSYTTYU	874.65	59.1556	63.1577	21.8284	0.93993
St-2-1_SUYTTTS	810.272	74.5659	63.1703	29.7068	0.894872
St-2-1_USYTYUU	1218.11	50.6133	63.1834	13.4137	0.977245
St-2-1_TTUTTUU	887.397	56.4987	63.1841	20.5538	0.94823
St-2-1_UTYTUTT	1027.98	86.2289	63.2065	27.0897	0.921147
St-2-1_TSSSSTY	830.305	26.1767	63.2076	10.1811	0.98659
St-2-1_SSTSYUY	1184.03	68.9865	63.2444	18.8251	0.957835
St-2-1_TTUYSTT	719.369	35.9136	63.2513	16.1314	0.966275
St-2-1_TYSSTST	897.637	41.8159	63.2519	15.0525	0.970042
St-2-1_TTSYTYU	872.322	39.5969	63.2557	14.6682	0.971969
St-2-1_YUSYTYY	862.635	67.9557	63.2619	25.4603	0.915974
St-2-1_UTTYTST	907.116	46.4644	63.2644	16.5538	0.964962
St-2-1_YSSYUUU	988.879	67.4689	63.2784	22.0528	0.939576
St-2-1_TTSYUUT	847.916	49.581	63.2877	18.9032	0.954743
St-2-1_STTSTTU	895.639	41.1806	63.2901	14.8643	0.97149
St-2-1_TUYUUST	739.997	45.0769	63.3007	19.6956	0.954011
St-2-1_YSTSTUS	1246.07	70.7033	63.3051	18.3471	0.956656
St-2-1_TTTSTYU	877.547	61.7204	63.3059	22.7415	0.937181
St-2-1_TYUSTTU	1091.79	52.554	63.3122	15.5659	0.968423
St-2-1_YUSYSUS	1116.19	67.0102	63.3131	19.4138	0.952174
St-2-1_TTYUTSS	712.461	35.0678	63.3215	15.9188	0.966939
St-2-1_UTSYSUS	1029.01	63.0773	63.3256	19.8257	0.950161
St-2-1_TSUYTSY	1093.2	76.1214	63.3473	22.5274	0.936248
St-2-1_TYYUTUU	905.965	45.4705	63.3508	16.2386	0.967785
St-2-1_SUYSTTU	1002.41	63.1582	63.3636	20.3895	0.945076
St-2-1_UYUSTST	1009.7	53.0991	63.3726	17.0196	0.961439
St-2-1_USSSYUS	1379.93	68.7255	63.3755	16.1186	0.969398
St-2-1_TYUSUUT	1103.72	56.4902	63.3946	16.5688	0.965317
St-2-1_USUSUUY	1094.4	56.8556	63.3988	16.819	0.963935
St-2-1_SSTSTYS	1092.53	53.7534	63.4056	15.9297	0.966432
St-2-1_UTTYTUU	911.971	38.099	63.4082	13.5265	0.976145
St-2-1_TYTSTUU	933.04	52.3829	63.4141	18.1791	0.956636
St-2-1_UTUYUUU	989.072	47.9427	63.4368	15.7002	0.96965
St-2-1_USSSTSS	938.56	73.9692	63.4631	25.5382	0.917173
St-2-1_STSYUTU	904.511	38.6344	63.4719	13.8409	0.975724
St-2-1_UTYSSUU	990.048	67.8027	63.479	22.1946	0.941967
St-2-1_UTYTUUU	868.196	54.9845	63.4833	20.5253	0.950394
St-2-1_TYYTYYS	1144.13	68.3737	63.4868	19.3692	0.952446
St-2-1_STYUTYU	783.834	37.2247	63.488	15.3924	0.970724
St-2-1_SUSYUTT	990.785	44.7954	63.4912	14.6548	0.972863
St-2-1_UTYTSSS	1036.66	63.6015	63.4932	19.8869	0.952283
St-2-1_SSUYTYU	1004.61	79.9952	63.4943	25.8124	0.912931
St-2-1_TUYTYUS	1403.3	76.7292	63.4978	17.7241	0.961117
St-2-1_TSUTTUS	1063.55	55.4435	63.5022	16.8992	0.964471
St-2-1_SUYTUSY	836.603	52.8451	63.5086	20.4789	0.948563
St-2-1_SSTYTUS	1174.45	62.1322	63.5093	17.1517	0.962178
St-2-1_SYYSTTT	1017.31	66.1279	63.5195	21.0786	0.941863
St-2-1_YTSYTST	994.35	70.7972	63.521	23.089	0.929076
St-2-1_TSYSSUT	1049.61	44.7446	63.5223	13.8232	0.976422
St-2-1_TUUTTST	900.256	35.7666	63.5248	12.8833	0.979621
St-2-1_SUYTTTU	816.835	54.1253	63.5397	21.4908	0.943174
St-2-1_YTUTTUY	998.721	49.3923	63.5422	16.0409	0.967132
St-2-1_USUSYUS	1305.62	62.1037	63.5441	15.4285	0.971016
St-2-1_TSSYYUY	1098.51	29.7293	63.5453	8.77837	0.990248
St-2-1_TTYSTYT	871.305	50.4579	63.5462	18.7856	0.953318
St-2-1_TSSSTYU	974.571	51.0594	63.5484	16.9946	0.962948
St-2-1_YYYSTYY	1058.22	95.0988	63.5507	29.1523	0.893487
St-2-1_TUTYTUY	1086.34	62.7723	63.552	18.7436	0.955155
St-2-1_YTUSUTU	987.086	49.5815	63.5529	16.2944	0.967771
St-2-1_UTTYTUS	982.451	77.3747	63.5803	25.5585	0.918797
St-2-1_YUUSSTS	1114.8	57.5255	63.5865	16.7466	0.964616
St-2-1_STTSTUY	1101.37	79.9491	63.5941	23.5615	0.92903
St-2-1_USYTTTU	795.978	41.3044	63.614	16.8466	0.965346
St-2-1_UUYTSTT	706.013	46.6138	63.618	21.436	0.945481
St-2-1_SUYTYTT	1060.98	47.0282	63.6194	14.391	0.974016
St-2-1_YYSSTYT	1092.65	69.4966	63.6254	20.6512	0.945641
St-2-1_TYYTTTY	798.648	32.7027	63.627	13.2959	0.978094
St-2-1_TTYSSSS	909.424	63.2871	63.6478	22.6024	0.937192
St-2-1_TSYUSTT	845.561	59.1533	63.6631	22.7283	0.943259
St-2-1_UTSSSSS	945.975	38.3021	63.6745	13.1553	0.978407
St-2-1_UUTTTST	729.117	50.418	63.68	22.4693	0.943696
St-2-1_YSUYTSY	1173.75	73.0798	63.6814	20.231	0.9461
St-2-1_TUUTSUT	895.331	49.2205	63.6849	17.8638	0.962668
St-2-1_TUYUTTU	736.564	24.3066	63.7095	10.7266	0.985665
St-2-1_TUSYSSU	781.519	33.0975	63.7297	13.7694	0.976425
St-2-1_YUYTYUU	1412.09	74.4684	63.7315	17.1471	0.964297
St-2-1_TUUTTUT	939.28	34.8951	63.7352	12.0801	0.981533
St-2-1_TTSYUUU	839.023	39.86	63.7372	15.4483	0.970384
St-2-1_TSSYUTS	925.166	52.7175	63.7449	18.5298	0.956479
St-2-1_SUSSTSY	1055.13	77.6728	63.7473	23.9422	0.926232
St-2-1_SUYUTST	890.501	47.05	63.7479	17.183	0.962586
St-2-1_YSUYTTU	1023.06	62.3756	63.761	19.8325	0.948194
St-2-1_SSTSTTU	1008.81	59.065	63.7638	19.0445	0.955825
St-2-1_STYSYST	1138	91.4653	63.7953	26.1549	0.920811
St-2-1_UTUSSYU	906.881	28.161	63.801	10.1059	0.987433
St-2-1_YTSYYUY	1070.42	54.7192	63.8039	16.6365	0.965872
St-2-1_STUTSUS	925.334	46.2489	63.8102	16.2677	0.967912
St-2-1_TTYTYTS	1208.45	55.6651	63.816	14.994	0.972974
St-2-1_TTSYUUY	936.735	51.1647	63.829	17.7816	0.961015
St-2-1_SUYUTSU	835.976	48.6724	63.8441	18.9585	0.954715
St-2-1_SSYUTUS	1108.55	44.5061	63.8557	13.0751	0.979148
St-2-1_TSUTTTT	896.337	34.3921	63.8586	12.4965	0.981159
St-2-1_TSYTUUS	862.103	47.6346	63.8753	17.9992	0.961143
St-2-1_TTUSUSY	906.993	53.8826	63.8842	19.3547	0.953714
St-2-1_YUSYUTS	916.061	32.6968	63.8915	11.6296	0.982803
St-2-1_YUSYTSS	1068.99	86.7722	63.8934	26.4495	0.910882
St-2-1_TTSTYYS	900.646	49.254	63.897	17.8198	0.962997
St-2-1_TSYTTTT	855.356	39.7099	63.9188	15.1312	0.971708
St-2-1_TSYUTSS	801.266	51.4863	63.9234	20.9439	0.94509
St-2-1_UUYTYUU	1297.37	60.8704	63.9285	15.2942	0.971739
St-2-1_TTYUSSS	837.164	41.1621	63.9362	16.0297	0.969511
St-2-1_UUSYSTY	809.441	50.6261	63.9375	20.39	0.948602
St-2-1_STTYTUY	986.516	53.0058	63.9495	17.5191	0.960177
St-2-1_TYUYTTS	915.084	55.4313	63.9535	19.7535	0.94851
St-2-1_STUYTYT	982.034	58.9589	63.954	19.578	0.948981
St-2-1_YUUYSUU	1058.77	78.517	63.9581	24.1832	0.931725
St-2-1_YSYUTSU	907.221	60.6586	63.9703	21.8068	0.942696
St-2-1_YSTYTUY	1164.48	74.139	63.9707	20.7646	0.945402
St-2-1_YSUYUTY	1039.85	57.4909	63.9773	18.0338	0.960841
St-2-1_SUTYTUU	983.247	65.0267	63.9815	21.5728	0.942079
St-2-1_TUYUUSU	750.489	50.4781	63.984	21.942	0.944752
St-2-1_TTUYSTY	794.333	52.5929	63.9895	21.5999	0.944297
St-2-1_SSSYSUU	951.97	85.1871	63.9972	29.1989	0.898814
St-2-1_UTUSUYU	916.684	62.9733	63.9972	22.4132	0.938031
St-2-1_USSYSTT	863.053	42.9493	64.0059	16.2384	0.967236
St-2-1_SSUTTYT	961.163	71.8857	64.0166	24.4086	0.927403
St-2-1_SSYTYTT	1058.89	86.0136	64.0335	26.5148	0.918119
St-2-1_SUYUTUS	1170.44	59.7427	64.0348	16.6617	0.966734
St-2-1_TSSSSTS	1007.02	45.7942	64.0368	14.8448	0.973315
St-2-1_TTSYSUS	1026.99	63.1328	64.0591	20.0725	0.95125
St-2-1_STSSSTY	872.212	44.6266	64.0615	16.7066	0.965586
St-2-1_UTUUUST	837.931	47.5994	64.0749	18.553	0.961305
St-2-1_SUSYUUS	1183.91	56.3897	64.0858	15.5581	0.970081
St-2-1_YTYTYTU	1015.13	60.2277	64.0885	19.3804	0.955097
St-2-1_YTSYSTY	793.663	63.6967	64.0918	26.218	0.913049
St-2-1_TUUYUUU	943.549	52.363	64.1098	18.1325	0.960625
St-2-1_TTTSSUY	834.57	46.4309	64.119	18.1797	0.959772
St-2-1_UYYTTYY	705.289	47.9069	64.1198	22.198	0.938278
St-2-1_YUUSTTU	1121.09	39.309	64.123	11.4586	0.982986
St-2-1_TTTSSUS	878.481	50.9483	64.1238	18.9523	0.956408
St-2-1_SYYTTUT	996.367	57.0292	64.1294	18.7057	0.957213
St-2-1_UYUSTSS	1030.26	50.9979	64.1349	16.1789	0.966009
St-2-1_TYSSTYS	1131.19	74.8816	64.1392	21.6376	0.942019
St-2-1_TSYUTUY	927.886	49.6876	64.1532	17.5059	0.962135
St-2-1_STUTTSS	897.654	43.0657	64.1925	15.6925	0.968762
St-2-1_TTTYTYS	924.414	35.7002	64.1934	12.6318	0.980321
St-2-1_SUSYTSU	1024.71	81.449	64.238	26.0157	0.915528
St-2-1_UUSYUUU	854.636	42.7702	64.2433	16.38	0.966751
St-2-1_UTTYTTS	907.386	48.5974	64.2448	17.5301	0.96123
St-2-1_TTTYTSS	891.146	61.4772	64.245	22.5791	0.938551
St-2-1_TYUYTYU	1009.14	97.0851	64.2535	31.4943	0.88175
St-2-1_UUYTUST	774.543	46.6307	64.2644	19.7107	0.95523
St-2-1_UTTYTYT	860.958	48.8704	64.2906	18.5891	0.957901
St-2-1_STYTYYU	1015.88	58.117	64.3157	18.7417	0.956561
St-2-1_UYYTSUT	892.255	45.1623	64.3173	16.5828	0.96755
St-2-1_SYTSTYS	1157.7	55.2443	64.3224	15.6346	0.968027
St-2-1_USTYTUS	974.743	74.3366	64.3269	24.9901	0.922101
St-2-1_YSSSTYY	1016.39	64.7972	64.3362	20.8927	0.943005
St-2-1_SSSYYUY	1164.53	48.1743	64.3566	13.5598	0.977518
St-2-1_UTYTUSY	746.415	50.7207	64.3572	22.2735	0.939906
St-2-1_UUUSSUS	1043.71	71.7854	64.3629	22.5454	0.939079
St-2-1_TSSYSST	828.32	48.1561	64.3643	19.0575	0.956037
St-2-1_TTYYTUS	888.201	60.3098	64.3719	22.2606	0.941088
St-2-1_TYUSTSU	995.391	46.0644	64.3776	15.173	0.971037
St-2-1_UTTYTYS	1033.45	63.0749	64.3809	20.0112	0.951753
St-2-1_TSYTTUY	881.063	34.425	64.3828	12.8114	0.979016
St-2-1_TTSUTSS	799.367	45.4234	64.3913	18.6345	0.959278
St-2-1_TTSYUST	841.799	45.6277	64.412	17.7785	0.961487
St-2-1_SYSSTYS	1191.81	94.7485	64.4168	26.0799	0.916411
St-2-1_TUUSUYS	1016.12	63.6082	64.4177	20.5349	0.950815
St-2-1_TSSYUUY	932.386	49.2581	64.4182	17.3305	0.962228
St-2-1_UTUTTTY	824.654	45.8531	64.4202	18.2401	0.960152
St-2-1_SSSYTYS	1023.17	76.7556	64.426	24.6122	0.923393
St-2-1_TSUYSTT	866.792	37.6529	64.4286	14.2513	0.975039
St-2-1_TYSYUUS	1072.14	32.6752	64.4382	10.0002	0.987613
St-2-1_YSTSTUY	1171.35	81.4812	64.4401	22.8265	0.93541
St-2-1_TTSSTSY	847.838	56.4734	64.4476	21.8594	0.939488
St-2-1_UTSSSUU	951.86	78.4411	64.4506	27.0466	0.915262
St-2-1_USUUTYT	746.546	42.1718	64.4688	18.5429	0.957293
St-2-1_TYTSTUT	1048.28	63.6875	64.4714	19.9424	0.950208
St-2-1_TUSSUSY	875.167	45.7881	64.4748	17.1747	0.964483
St-2-1_TSTSUYS	1010.33	62.7335	64.476	20.3839	0.952032
St-2-1_TSUTTUU	914.68	42.6897	64.4782	15.322	0.970993
St-2-1_YUUYUUY	1007.42	104.053	64.4811	33.9125	0.870373
St-2-1_STUYUTY	947.1	53.3058	64.4825	18.4784	0.958148
St-2-1_TYUYTSU	965.554	58.8302	64.4923	20.0058	0.951605
St-2-1_TUSYYUT	1166.02	46.1608	64.4952	12.9996	0.980277
St-2-1_TUSYUTS	959.624	63.6634	64.4986	21.7849	0.943223
St-2-1_TYSYTYT	987.322	73.1583	64.5074	24.3362	0.926087
St-2-1_TTSSSUU	940.96	50.4838	64.5233	17.6235	0.963464
St-2-1_SUUTTUU	1009.33	60.5952	64.53	19.722	0.953851
St-2-1_TSYYTST	836.582	53.4208	64.5361	20.9793	0.949476
St-2-1_STYTSSS	891.756	58.3747	64.5448	21.5087	0.942944
St-2-1_UTYUUSS	777.859	35.3328	64.5496	14.9258	0.973608
St-2-1_UUSYUTU	818.764	46.4143	64.5718	18.6323	0.958377
St-2-1_YTUSSUS	1151.83	63.0958	64.5733	18.0049	0.959927
[truncated: 14,385 more rows]

## Sheet: St-23-2_7merPerm_Kd
Sequence	Bmax	Bmax_SD	Kd	Kd_SD	R2	Median @1500nM	threshold
TUYUTUS	1196.58	151.98	1796.14	361.086	0.996513	550.92	ok
UUYTTTY	869.607	144.3	1586.07	434.448	0.992943	430.08	ok
UTYUUUU	1025.16	173.885	1741.28	472.296	0.993568	459.8	ok
TUYUUUT	1118.12	212.843	1844.66	550.99	0.992564	486.16	ok
TUYSTSU	649.421	138.191	1291.23	488.807	0.984587	337.04	ok
UTYUUSY	805.133	81.8383	1540.53	261.132	0.997187	399.3	ok
TUYUUUS	994.786	305.235	1819.86	880.047	0.979969	467.36	ok
UTYUUTT	732.233	147.066	1413.89	488.381	0.987961	362.22	ok
TUYUUTT	675.598	144.955	1412.54	521.407	0.986073	359.32	ok
UUYUUUU	1062.16	140.407	1844.77	382.637	0.996387	466.48	ok
SUYUTUY	1558.95	421.078	2340.82	922.711	0.98964	587.32	ok
UUYTTUT	1294.33	185.535	2145.14	460.346	0.99661	538	ok
TUYTUUY	1044.53	128.976	1876.16	361.532	0.996893	467.04	ok
UTYSUUU	604.031	52.7135	1284.77	199.846	0.997349	319.56	ok
UUYTUUY	1063.34	79.5966	1906.48	221.573	0.998887	468.08	ok
UUYUUTT	749.47	237.984	1474.85	793.18	0.972171	353.48	ok
TTYTUTT	777.991	216.29	1499.89	701.994	0.979005	366.16	ok
TUYUUUY	1156.21	146.038	2034.75	390.978	0.997133	496.52	ok
UUYUTTS	1015.56	130.457	1891.31	378.177	0.996689	454.8	ok
UTYUYTS	520.11	188.979	1223.51	807.393	0.954059	259.4	ok
UUYUTTY	1062.71	162.101	1961.07	460.315	0.995588	463.44	ok
UUYTTUU	1223.64	331.592	2175.5	878.9	0.988135	512.92	ok
TTYUUUS	1099.25	178.433	1965.4	490.592	0.995081	462.72	ok
TUYUTUT	1355.74	338.859	2325.99	849.977	0.99089	543.16	ok
TTYUUTU	702.545	73.5971	1502.52	264.82	0.996947	347.36	ok
TTYTTSY	1105.19	234.035	2007.41	649.396	0.99191	462.88	ok
UTYUUYY	768.326	115.575	1586.1	393.837	0.994169	365.16	ok
UTYUUST	841.478	73.8593	1702.52	240.769	0.998205	390.12	ok
TUYTUUU	1022.47	156.727	1957.91	462.058	0.995518	447.12	ok
TUYUUUU	1168.06	269.382	2153.15	742.575	0.991265	488	ok
UTYUSSS	1680.98	688.026	2588.32	1503.55	0.980022	586.44	ok
YUYTYUT	475.775	215.091	1231.96	1008.84	0.931158	231.76	ok
UUYUTTU	1311.29	141.37	2290.39	362.619	0.998265	517.04	ok
TUYUTYT	812.779	138.576	1718.98	470.685	0.993296	385.24	ok
TUYUUST	912.72	245.623	1871.28	786.541	0.985369	418.92	ok
TTYUUYT	899.166	70.6349	1813.57	224.786	0.998683	405.48	ok
UTYTUUT	1083.16	180.631	2075.51	523.359	0.995155	460.36	ok
TTYTUUT	1070.34	223.706	2075.47	655.921	0.992424	458.6	ok
TTYTUUY	1182.92	316.08	2126.33	852.847	0.988329	469.44	ok
TTYUUUT	1113.06	109.634	2105.63	312.239	0.998346	463.68	ok
TUYUTUU	1575.82	175.593	2591.96	409.75	0.998479	569.84	ok
STYUUUY	1182.8	220.329	2219.93	612.82	0.994506	487.26	ok
TTYTUYT	861.707	287.663	1723.94	923.357	0.975523	377.56	ok
TTYTUUU	1015.76	262.024	2025.09	795.872	0.988058	441.76	ok
SUYUUUU	1075.84	112.479	2057.82	326.171	0.998083	448.6	ok
TTYTTTT	964.693	80.781	1927.11	249.693	0.998636	418.96	ok
UUYUTUS	1482.78	154.359	2541.79	377.384	0.998619	552.28	ok
UTYUTUU	1296.39	109.806	2330.14	288.408	0.998961	506.26	ok
UUYUTUY	1377.7	677.97	2499.59	1762.4	0.968927	541.8	ok
TUYUTSU	1221.55	105.484	2246.47	286.484	0.998858	486.52	ok
SUYUUUY	1325.54	195.499	2389.52	511.317	0.996938	516.68	ok
UUYUUUS	1148.75	160.47	2192.82	455.597	0.996856	473.04	ok
TUYTTYT	818.595	101.093	1762.93	346.721	0.996611	379.76	ok
TUYSTYS	581.084	63.847	1388.22	264.095	0.996207	299.04	ok
TUYSUYY	489.34	47.7484	1245.07	219.164	0.99648	267.64	ok
YTYUUUY	1104.85	119.522	2110.38	343.471	0.998016	452.08	ok
TUYUUYY	1006.29	359.504	1953.2	1075.15	0.976275	417.44	ok
TTYUUYU	878.213	91.6189	1825.98	299.897	0.997715	389.68	ok
TUYSTUT	871.956	68.1442	1825.03	224.578	0.998712	389.2	ok
UUYTUTY	805.353	67.8144	1739.89	234.342	0.998404	370.12	ok
TUYTUTT	747.611	73.1865	1670.35	265.16	0.997701	353.44	ok
TUYTUUS	1132.08	173.462	2201.63	501.147	0.996259	465.52	ok
UUYUTSY	1314.58	287.489	2418.62	764.807	0.993438	510.84	ok
TUYUUSY	942.006	118.292	1921.13	373.653	0.996935	404	ok
UUYSTUT	902.57	74.0341	1895.06	241.807	0.998661	395.4	ok
TUYUTUY	1462.22	325.165	2608.92	821.637	0.993924	543.04	ok
YUYUTUY	1155.1	137.615	2240.32	394.482	0.997794	466.2	ok
UUYUUTY	972.04	189.824	1961.91	589.491	0.992907	406.92	ok
UUYTTYU	908.311	107.21	1896.96	348.189	0.997226	393.2	ok
TUYTTUT	1344.36	321.293	2489.39	853.392	0.992515	515.04	ok
YTYUTTY	960.803	227.555	1945.93	710.93	0.989464	401.72	ok
TTYUTUT	1453.04	534.726	2635.25	1369.74	0.983816	542.92	ok
TUYUTTT	1287.46	317.555	2439.44	867.93	0.99177	501.18	ok
YUYUUYY	962.65	101.357	2016.33	323.875	0.997973	413.84	ok
TUYSTUY	902.517	301.055	1980.9	1013.62	0.979316	403.84	ok
TUYTTTT	1111.72	260.148	2236.89	773.992	0.991506	456	ok
UTYUUTS	831.963	118.691	1821.58	409.441	0.995729	371.28	ok
UTYUUUT	1203.65	263.861	2348.56	750.644	0.993101	478.64	ok
UUYSTUY	883.833	264.601	1957.49	902.312	0.982964	398.52	ok
UUYTTTT	1099.84	314.885	2231.03	945.208	0.987308	453.64	ok
UTYTTUU	1287.5	410.239	2477.8	1133.93	0.986527	500.72	ok
TUYUSUY	1405.04	448.586	2512.34	1147.65	0.987142	507.08	ok
UUYTUUT	1319.41	193.996	2440.33	517.521	0.997096	492.52	ok
TUYTUYY	845.973	95.9517	1843.36	328.142	0.99734	372	ok
TUYTTSY	1160	465.756	2343.11	1372.57	0.976953	472.84	ok
TUYSTTU	867.825	158.079	1864.96	531.171	0.993309	375.6	ok
UTYUUUS	1246.22	283.7	2420.47	796.57	0.992917	486.04	ok
UTYTUTS	793.52	128.067	1802.82	459.971	0.994453	361.88	ok
TUYTUTY	795.393	159.488	1832.03	577.7	0.991566	367.6	ok
UUYTUTS	781.323	124.148	1801.06	452.556	0.994593	360.72	ok
TUYYTUT	504.783	64.649	1344.98	301.771	0.994605	269.28	ok
STYUUUU	1143.23	226.935	2286.79	666.924	0.994102	456.86	ok
YUYSUUY	809.446	110.797	1831.71	394.316	0.996053	365.82	ok
STYUTSY	951.875	84.2717	2013.49	272.065	0.998576	401.6	ok
TUYUTTY	1313.35	325.862	2516.37	892.919	0.99203	501.52	ok
UTYUTTU	1121.5	109.417	2256.6	324.708	0.998536	449.68	ok
UUYSYUT	422.826	191.394	1238.31	1013.3	0.931137	207.84	ok
UUYUUSS	986.772	85.8972	2076.37	273.268	0.998689	411.28	ok
YTYUTYY	850.442	192.869	1851.19	658.004	0.989469	366.1	ok
TTYTTYT	880.363	60.892	1932.94	206.672	0.999072	382.16	ok
UUYTTUY	1518.15	82.0708	2728.5	206.431	0.999667	537.88	ok
UUYSUYS	532.051	100.859	1366.04	451.04	0.988657	269.04	ok
UTYTUYU	845.965	114.232	1908.82	400.031	0.996419	375.84	ok
YTYUTUY	1035.64	197.84	2167.89	618.053	0.99404	426.84	ok
UUYTUYU	906.607	60.5804	1979.3	202.935	0.999162	388.68	ok
UTYTTUT	1441.07	127.776	2656.99	332.023	0.999071	519.92	ok
TUYSTSS	784.632	70.2333	1807.13	255.52	0.998278	352.8	ok
UUYYUUU	472.747	57.6056	1312.25	282.732	0.994914	255.52	ok
TUYSTTY	831.746	124.918	1866.85	438.253	0.995421	363.32	ok
TUYTUSY	1054.32	223.054	2164.62	683.749	0.992792	420.84	ok
UTYTTSS	1410.62	279.185	2598.84	729.196	0.995269	505.24	ok
TUYUSSY	1614.96	343.889	2893.62	849.415	0.995303	561.6	ok
TTYUUTS	918.254	176.39	2042.32	596.146	0.993453	395.92	ok
SUYUUUS	1396.08	133.176	2629.78	354.52	0.998898	509.12	ok
SUYSUUY	950.651	131.404	2048.79	429.912	0.996615	396.24	ok
TTYUTYT	1081.14	95.4449	2236.54	291.967	0.998793	432.32	ok
YTYTUUY	1003.39	131.804	2153.53	423.01	0.997139	415.98	ok
TUYSUSS	588.741	52.4305	1519.39	226.751	0.997815	291.88	ok
UTYSUUY	725.617	196.133	1773.02	761.784	0.983976	340.52	ok
UUYTTSY	1421.61	337.761	2634.41	884.121	0.993298	504.84	ok
TUYTUSS	1035.82	94.3577	2182.07	296.076	0.998658	417.88	ok
TUYUTYY	963.161	137.016	2086.07	448.03	0.996529	399.48	ok
YUYUUUS	1039.22	139.781	2209.76	441.071	0.997133	422.5	ok
UTYTUTY	919.838	188.625	1994.61	626.089	0.992454	381.04	ok
TUYSUUT	817.042	48.3384	1888.52	173.998	0.999295	360.28	ok
STYUSSU	1357.86	539.52	2533.51	1436.99	0.980518	481.7	ok
UUYUUUY	1514.94	331.246	2814.2	854.294	0.994802	534.48	ok
TTYTTUT	1294.2	264.271	2565.11	745.188	0.994755	486.76	ok
TTYSUUY	755.08	170.478	1841.1	652.648	0.989412	348.48	ok
TUYUTTS	1290.53	127.32	2517.45	355.16	0.998751	476.16	ok
UTYYUUT	448.338	45.9026	1257.01	231.315	0.996225	237.64	ok
TUYTUYU	850.033	114.597	1969.24	408	0.996564	372.24	ok
TUYUTSS	1441.21	353.682	2753.95	943.553	0.993237	520.52	ok
STYSUUT	784.66	188.46	1812.01	686.872	0.987949	340.56	ok
UTYYTUS	447.336	49.1628	1289.89	252.293	0.995776	241.92	ok
SUYUTUU	1688.2	437.454	3035.03	1071.38	0.993573	568.72	ok
TTYTTUS	1431.08	194.675	2731.73	519.907	0.9979	511.68	ok
UUYSUUT	868.203	224.882	2032.05	801.046	0.987968	379.8	ok
SUYTUYY	1164.5	300.159	2445.09	908.528	0.990953	455.48	ok
UTYTUUU	1332.27	461.584	2550.71	1259.21	0.985212	474.1	ok
TTYUTUU	1730.56	198.974	3052.82	477.485	0.998757	564.68	ok
UUYTUUU	1398	186.386	2707.52	506.211	0.997957	500.48	ok
TUYSUSU	617.059	66.6924	1585.73	282.932	0.996962	293.08	ok
SUYUUSU	840.882	179.763	1927.23	637.488	0.991195	356.04	ok
STYUTUS	1530.02	410.257	2885.29	1067.3	0.992506	532.94	ok
YTYTTYS	480.327	50.852	1373.42	252.753	0.996376	253.64	ok
TTYSUUS	752.813	79.837	1846.05	307.122	0.997653	340.64	ok
YUYSTYY	542.301	45.3104	1463.43	207.671	0.99795	269.6	ok
TTYYTUU	513.566	174.457	1405.16	822.77	0.965713	246.2	ok
TUYUYUS	591.555	132.435	1518.58	569.833	0.986496	279.68	ok
TUYUSSS	1741.72	248.995	3094.29	599.787	0.998096	569.76	ok
TTYTUSY	905.694	71.0897	2063.05	245.306	0.998921	379.68	ok
UUYUTYU	1041.37	304.359	2205.46	957.087	0.986721	405.36	ok
UUYTTYY	958.809	244.685	2109.57	810.03	0.989073	386.76	ok
TTYUTTU	1203.54	134.54	2484.05	398.546	0.998355	454.72	ok
YUYTTUT	1274.4	217.973	2583.63	627.475	0.996386	472.8	ok
STYTTTY	1101.55	146.958	2322.22	453.162	0.997398	424.54	ok
SUYUTTT	1187.82	389.055	2500.09	1173.2	0.986039	457	ok
STYUTYT	967.004	207.3	2198.31	700.4	0.992668	401.7	ok
TUYUUYU	1162.87	114.341	2427.32	344.758	0.998679	442.8	ok
YUYTTYY	767.287	128.871	1838.75	485.096	0.994137	335.16	ok
YUYTTYU	741.572	108.933	1798.41	417.966	0.995396	327.64	ok
TTYTTUU	1331.78	441.8	2697.97	1256.29	0.987292	491.08	ok
SUYTSST	1069.37	94.6008	2314.75	299.798	0.998847	419.68	ok
YUYTUTS	910.053	439.339	2035.15	1494.57	0.960827	356.82	ok
UTYSTUY	979.362	215.841	2151.58	709.266	0.992118	389.8	ok
TTYUTTT	1223.23	226.91	2532.69	670.723	0.995601	457.12	ok
UUYSTTU	841.14	207.268	2042.05	764.653	0.989151	367.28	ok
UUYUTYT	1015.59	257.005	2293.93	852.103	0.990478	412.32	ok
TUYSTTT	863.978	225.954	2078.01	821.448	0.988159	373.4	ok
TTYUUUY	1387.65	100.29	2738.79	276.75	0.999411	490.76	ok
UTYUUSU	1146.14	440.847	2497.93	1376.87	0.980802	445.92	ok
TUYUYUU	590.413	92.8131	1570.45	408.929	0.993612	280.16	ok
TTYYTUY	482.728	73.7263	1366.44	363.457	0.992577	243.52	ok
YUYTUUT	1074.48	176.061	2368.34	564.461	0.996203	421.56	ok
SUYTUUT	1268.95	127.287	2586.79	368.32	0.998757	460.24	ok
YUYTUUY	1251.26	213.795	2594.61	628.774	0.99639	461.46	ok
UUYSUUU	949.027	82.8423	2182.99	283.8	0.998765	387.88	ok
SUYUUYU	1320.83	155.3	2686.75	443.902	0.998386	477.16	ok
UTYUUTU	840.429	67.8276	2015.76	248.207	0.998816	357.8	ok
UTYSTTU	764.716	106.412	1916.81	413.415	0.996169	340.16	ok
UUYTTTS	1332.34	115.858	2697.01	329.224	0.999123	478.3	ok
UUYSTSU	803.66	137.879	1982.89	521.684	0.994492	351.44	ok
SUYTSSY	1364.21	252.3	2696.12	700.019	0.99605	477.72	ok
UUYUSYY	1229.04	287.835	2518.42	843.319	0.993054	445.76	ok
UTYUUUY	1433.59	144.999	2826.56	396.467	0.998897	500.08	ok
TTYUYYU	635.992	208.234	1625.47	871.09	0.974226	287.48	ok
TUYUYST	742.913	275.544	1805.39	1058.08	0.971832	319.24	ok
UTYSUUS	826.208	161.049	2016.91	599.717	0.993102	356.16	ok
UUYSUST	626.606	198.302	1612.95	837.716	0.975544	284.8	ok
UUYUUUT	1270.04	328.923	2652.35	968.55	0.992015	468.12	ok
TUYTYUU	523.64	193.481	1471.75	921.726	0.962743	244.36	ok
TSYUUUS	409.31	36.745	1267.63	203.878	0.99712	222.68	ok
UUYTUTU	978.481	145.778	2205.31	487.853	0.996533	387.12	ok
UTYTTYT	964.466	133.933	2190.44	452.565	0.996938	384.3	ok
UTYSUSU	531.07	113.476	1537.03	548.128	0.987638	269.2	ok
TUYUYSU	612.61	66.8848	1647.86	293.098	0.997079	288.24	ok
YUYUUTS	874.909	203.27	2047.12	722.203	0.990667	357.72	ok
TUYTSYT	1144.98	146.293	2476.59	454.534	0.997836	432.52	ok
UTYTUTU	910.994	99.7191	2146.95	351.742	0.998034	374.64	ok
TUYTTUS	1563.51	422.678	3032.43	1117.02	0.99297	528.64	ok
SUYUYYY	595.436	107.505	1595.53	474.538	0.991644	278.08	ok
SUYUUSY	924.149	100.057	2162.25	349.646	0.998076	376.12	ok
YUYUUUU	1222.63	277.713	2540.59	823.158	0.993541	441.74	ok
UUYTTTU	1281.25	115.516	2652.31	337.169	0.999029	461.04	ok
STYTUUS	1234.77	394.628	2642.29	1191.89	0.98779	458.92	ok
YUYUUUY	1521.93	351.99	2986.06	944.595	0.994729	518.2	ok
UTYUSYU	1165.19	233.346	2539.04	725.423	0.994867	439.72	ok
TTYYUUT	397.541	45.4045	1226.25	254.145	0.995173	212.28	ok
UTYSTSY	776.545	67.9552	1935.93	261.757	0.99852	335.04	ok
TTYUUTT	912.983	78.7599	2156.95	278.112	0.998789	372.64	ok
UUYUTYY	971.302	133.317	2266.97	458.302	0.997121	391.56	ok
TUYUTTU	1314.36	476.211	2757.7	1394.45	0.985473	476.2	ok
UTYUTUY	1849.93	200.636	3316.05	479.708	0.999028	572.04	ok
TUYYUUU	482.081	69.6053	1418.76	351.855	0.993716	244.12	ok
YUYUYYY	571.064	70.9671	1577.08	324.158	0.995954	271.04	ok
UUYUSSY	1638.24	245.144	3115.79	631.119	0.997943	535.36	ok
UUYUTUU	1528.17	364.701	3019.86	983.005	0.994483	517.92	ok
UTYUTUT	1722.31	207.639	3211.74	520.345	0.998732	549.84	ok
TUYSSSU	998.35	141.832	2279.85	476.275	0.996976	389.24	ok
UTYUTYY	921.675	174.471	2219.93	622.759	0.994339	378.92	ok
UUYUTTT	1373.68	152.228	2790.28	430.238	0.998657	475.76	ok
SUYTTSY	1276.18	293.256	2643.1	857.173	0.993731	450.24	ok
SUYYSSS	436.482	45.1906	1346.93	244.171	0.99646	229.36	ok
UTYTUYS	876.793	168.848	2149.54	619.335	0.993914	365.6	ok
UTYSUSS	711.02	76.4005	1842.21	310.739	0.997616	313.2	ok
STYTTSU	898.18	92.4712	2167.6	333.06	0.998273	368.24	ok
UUYSUYT	665.142	147.926	1821.81	638.328	0.989505	309.2	ok
YUYTUYY	881.295	105.413	2145.13	384.129	0.997613	363.92	ok
UUYSUUY	822.933	172.457	2073.69	657.283	0.992351	350.68	ok
UUYYSUU	511.821	208.61	1501.71	1029.99	0.956319	233.08	ok
TUYUUTU	876.027	65.5981	2132.37	239.477	0.999066	359.96	ok
UTSUTUT	265.675	129.631	1048.79	988.421	0.903799	135.28	ok
TTYSTTS	775.452	224.635	2018.68	891.792	0.984708	340.32	ok
TTYSUYU	564.837	112.129	1644.27	532.161	0.99028	277.16	ok
TUYTTTS	1381.73	332.402	2870.07	953.794	0.993931	483.68	ok
TUYUUTS	1019.45	122.139	2354.97	411.049	0.997957	396.64	ok
UUYUUYU	1084.58	108.022	2451.54	351.725	0.99867	412.68	ok
UUYYUYT	350.526	57.8353	1129.66	349.334	0.988734	190.08	ok
TUYYSUY	573.361	224.921	1602.31	1033.92	0.962707	256.08	ok
TTYUTUS	1630.35	431.522	3164.48	1129.55	0.993779	532.08	ok
TTYUUSU	1019.97	68.6968	2357.21	231.234	0.999346	396.28	ok
SUYSTUY	984.411	217.061	2345.07	754.229	0.992908	393.64	ok
YUYTYYT	508.131	78.7906	1479.95	388.187	0.993106	248.26	ok
TUYTTTY	1609.86	289.12	3122.54	758.698	0.997057	523.68	ok
USYTTUU	438.998	50.2171	1374.59	273.241	0.995812	230	ok
TYYUUUU	226.156	16.2376	846.88	128.619	0.996786	141.6	ok
TTYTUYU	936.713	170.307	2264.28	606.57	0.994959	378.48	ok
TTYTUUS	1217.38	427.161	2694.1	1327.39	0.985768	449.76	ok
UUYUTSS	1506.02	373.116	3018.23	1020.06	0.994101	503.76	ok
UUYUUTS	948.484	297.97	2313.76	1064.32	0.985566	385.92	ok
SUYUUYY	1572.52	300.12	3108.6	803.531	0.996628	518.28	ok
STYTTUT	1433.7	191.137	2926.16	536.272	0.998188	487.78	ok
YTYUTTU	1090.79	444.388	2393.6	1414.15	0.977716	398.96	ok
UUYYTUT	594.007	74.7683	1693.67	344.083	0.996232	282.04	ok
SUYYTTT	459.554	59.5539	1396.72	312.687	0.994809	232.44	ok
UUYTUTT	1061.22	170.152	2400.76	557.746	0.99647	399.24	ok
TTYTTTY	1105.56	366.822	2542.15	1202.95	0.985994	422.68	ok
TUYTTUY	1806.21	694.258	3419.11	1740.67	0.988327	568.16	ok
UTSUTUS	373.568	180.221	1291.92	1108.57	0.927689	178.8	ok
STYUYYT	715.808	55.1768	1895.39	227.263	0.998813	313.98	ok
UTYUUYT	1125.74	245.573	2564.21	795.884	0.993982	424.6	ok
TUYUUYT	1125.53	205.431	2553.18	663.824	0.995768	422.68	ok
TSYUTUT	527.036	118.697	1510.18	571.196	0.986164	249.96	ok
UUYTYUU	540.947	73.9182	1555.63	353.276	0.995088	257.4	ok
TUYYUTS	376.281	184.881	1305.66	1136.49	0.925518	178.28	ok
TUYTUTU	949.001	174.488	2239.22	608.598	0.99487	370.16	ok
UYYUUTY	206.968	73.4892	871.533	646.436	0.930562	114.16	ok
TUSTTUU	254.894	102.773	1005.04	796.625	0.928707	134.36	ok
TUYUTYS	1122.29	194.413	2554.7	630.306	0.996196	421.32	ok
YTYUTST	1015.37	275.742	2331.75	925.146	0.98946	384.5	ok
TUYTUTS	918.474	262.32	2276.44	956.468	0.987718	375.2	ok
UUYUTUT	1851.79	451.184	3454.56	1112.22	0.995414	569.36	ok
YUYYUUS	459.558	89.2253	1452.85	480.346	0.988772	239.44	ok
TUYYUUT	487.372	82.4193	1506.08	428.149	0.991934	248.04	ok
TUYTTYS	1104.97	188.053	2529.13	614.73	0.996269	416.2	ok
YUYUTTY	1271.5	159.49	2740.34	480.515	0.998219	450.38	ok
STYUUUT	1443.88	340.401	2990.46	963.933	0.994541	491.08	ok
TTYUUSS	1113.79	202.496	2545.59	659.808	0.995805	417.6	ok
SUYSYTS	515.086	125.942	1508.4	619.654	0.983704	247.4	ok
SUYTUSY	867.337	44.7126	2157.11	166.204	0.999559	353.52	ok
UUYTUSU	989.307	186.582	2370.43	650.1	0.994955	388.2	ok
SUYUTTY	1454.98	316.983	3003.61	893.721	0.995367	491.88	ok
UUYYUUT	493.771	54.759	1509.49	281.183	0.996536	247.12	ok
TTYYTSU	391.674	37.3777	1285.57	218.618	0.99679	210.4	ok
TUYTUSU	1076.4	120.561	2456.96	396.162	0.998323	401.76	ok
YUYUUSY	983.955	157.571	2369.42	551.834	0.996338	387.36	ok
SUYTTYU	1052.63	103.181	2430.18	343.98	0.998692	397.12	ok
YTYTTST	857.366	304.508	2203.19	1162.21	0.980102	359.98	ok
YUYTUUS	1103.48	105.513	2521.61	344.631	0.998827	411.52	ok
TTYTTYY	891.224	108.753	2185.18	397.008	0.997616	356.52	ok
UUYSUTT	560.78	55.6715	1645.23	266.229	0.99759	268.2	ok
YUYSSSY	694.919	149.435	1845.57	622.639	0.99044	300.76	ok
UUYUTST	1675.25	298.326	3264.7	778.277	0.997314	531.96	ok
UTYUTST	1613.54	202.368	3152.59	533.707	0.998592	513.46	ok
SUYUSYU	925.98	75.9938	2254.48	272.958	0.998967	366.92	ok
TTYSSUS	868.66	103.712	2154.87	384.646	0.997676	350.12	ok
TTYSTUU	1088.93	204.287	2528.09	677.432	0.995498	410.68	ok
UUYTTYS	1086.63	122.394	2511.35	404.767	0.998363	407.84	ok
UTYUUTY	1083.33	230.11	2528.32	767.052	0.994225	410.52	ok
SUYYTUY	597.98	79.6941	1734.1	370.072	0.995901	281.36	ok
YTYTTYY	773.01	50.4527	2014.57	200.646	0.999219	326.64	ok
UUYUUSU	1141.49	255.184	2611.39	826.563	0.993926	423.4	ok
UUYYUUS	527.786	66.2142	1601.59	330.559	0.995939	259.52	ok
UYYUTUY	268.263	24.9819	977.737	181.07	0.995541	158.36	ok
UTYSTUS	1028.75	98.1415	2426.87	334.447	0.998751	392.96	ok
YUYTTTY	1153.38	223.512	2567.69	707.725	0.995345	415.7	ok
TSYTUYU	313.088	91.5853	1108.24	612.291	0.964985	164.8	ok
TSYUTUY	537.601	64.3468	1580.02	312.593	0.996295	255.68	ok
YTYUUST	858.667	67.1628	2158.65	252.302	0.998996	348.84	ok
TUYSUUU	854.199	157.59	2178.45	598.925	0.994489	351.68	ok
YUYUTTU	1082.66	222.281	2534.35	742.702	0.994604	408.66	ok
TUYUUTY	947.623	370.311	2372.33	1347.79	0.978554	381.96	ok
STYUUYS	1414.7	336.173	2913.63	952.802	0.994263	468.8	ok
SUYTUTS	969.45	203.525	2377.81	725.27	0.993751	382.48	ok
TTYUYUS	627.99	93.168	1792.16	421.146	0.9953	288.2	ok
UTYYUUS	468.01	33.9324	1458.1	179.789	0.998455	234.28	ok
SUYUSST	1438.46	236.93	3010.77	676.901	0.997367	483.08	ok
TUYUTSY	1523.42	272.509	3127.92	756.672	0.997062	501.24	ok
SUYUUTY	1009.58	149.657	2420.28	518.668	0.996999	387.8	ok
YUYUUYT	1040.64	141.549	2478.08	484.104	0.997535	397.04	ok
STYUUTU	947.591	190.824	2286.78	676.578	0.994	366.34	ok
UUYYTUS	623.296	75.9164	1779.84	344.151	0.996737	284.84	ok
UTYUTYS	1121.01	238.865	2603.45	786.082	0.994443	416.52	ok
STYYTUY	501.72	78.68	1567.17	407.385	0.993434	250.5	ok
UUYTSTT	1457.45	292.262	3041.13	830.367	0.996196	485.72	ok
UUYSUUS	989.851	103.9	2399.36	364.979	0.998465	382.8	ok
USYTTSU	366.175	74.8674	1279.93	467.112	0.985372	204.12	ok
TTYUUUU	1356.55	300.065	2930.7	890.807	0.995026	466.96	ok
YUYUTYU	853.276	166.304	2143.1	625.504	0.993782	340.96	ok
UTYYTUT	520.625	49.089	1580.74	246.321	0.997679	251.36	ok
UUYTUSY	1128.71	200.562	2621.73	658.894	0.996143	416.72	ok
YUYYSST	331.034	34.4973	1181.95	226.744	0.995646	187.82	ok
TUYTTSS	1454.07	262.949	3052.84	750.998	0.996875	484.28	ok
TTYTUTY	929.086	80.8644	2307.23	294.278	0.998879	366	ok
YUYUYYU	629.863	58.99	1790.34	265.677	0.998087	283.74	ok
SUYUTYT	1152	273.023	2673.99	891.637	0.99335	423.16	ok
UUYSUTS	652.19	61.9526	1847.67	275.257	0.998137	292.36	ok
YTYTTUS	941.534	185.345	2355.17	675.426	0.994433	372.58	ok
STYUTYY	1238.4	102.714	2746.57	318.264	0.999224	434.34	ok
SUYTTTT	1419.34	116.902	3001.8	337.725	0.999336	474.4	ok
STYTUYT	1200.37	125.821	2713.57	398.639	0.99874	428.54	ok
YUYTSTU	796.131	78.1792	2101.54	310.869	0.99836	331.72	ok
TTSUTUS	318.556	178.973	1241.16	1259.48	0.8992	152.92	ok
STYYTUT	502.183	67.1784	1533.82	342.697	0.995098	241.9	ok
UUSUTUU	282.141	64.0612	1018.3	452.052	0.976512	154.64	ok
SSYTTUY	545.002	230.923	1630.18	1129.43	0.957577	241.28	ok
SUSTTTT	289.977	187.173	1207.96	1423.2	0.866209	136.12	ok
UTYUYTU	600.091	207.879	1687.19	944.551	0.972889	264.92	ok
SUYUUST	830.26	91.2541	2175.15	356.432	0.998028	342.12	ok
TUYYUUS	493.526	61.8503	1554	323.782	0.995778	244.4	ok
STYTUSS	850.698	197.122	2154.63	746.465	0.991349	338.68	ok
YUYSTSS	568.08	102.436	1654.87	485.436	0.992095	260.1	ok
UTYTTTU	1251.13	367.502	2817.13	1148.54	0.990718	442.6	ok
SUYTUTY	942.727	158.091	2355.53	575.443	0.995995	369	ok
STYUUTY	1154.71	113.721	2655.3	368.612	0.998852	415.6	ok
YTYTUUT	1109.04	235.29	2626.71	787.788	0.994578	410.84	ok
STYUUTT	994.397	386.17	2489.04	1386.55	0.980455	389.18	ok
UTYUUYU	986.674	228.438	2446.6	816.418	0.992768	382.32	ok
UTYSUYT	609.57	102.303	1805.54	478.799	0.993926	281.96	ok
UUYYTTS	511.299	175.308	1543.74	882.028	0.969573	233.92	ok
TTYUTYS	1286.31	498.509	2903.06	1549.7	0.984609	452.96	ok
YUYUTYY	1067.55	131.453	2554.94	448.069	0.998071	398.42	ok
UTYTUTT	1008.85	91.9526	2448.33	321.573	0.998887	381.2	ok
STYTTYU	951.629	305.185	2315.43	1087.05	0.985243	360.46	ok
STYUTTT	1371.61	273.189	2986.09	813.476	0.996083	464.78	ok
UTYTUUY	1283.4	179.634	2862.57	553.846	0.997945	445.4	ok
TTYSUYY	618.059	86.3464	1809.94	399.225	0.995801	281.6	ok
TUYUYYU	696.052	49.3552	1939.84	212.389	0.999031	301.8	ok
UUYYTUU	534.905	45.7571	1643.73	229.263	0.998192	255.72	ok
TTYYTTS	478.777	130.952	1467.9	681.152	0.979006	228.12	ok
UUYUYTU	548.139	60.965	1650.78	298.928	0.997019	256.08	ok
SUYSSST	945.947	139.565	2343.65	504.452	0.996874	363.48	ok
UTYSTTY	883.24	81.6048	2253.92	307.242	0.998692	349.56	ok
UTYUTUS	1812.94	361.462	3529.69	925.46	0.997041	547.04	ok
TUYUSUS	1597.51	181.053	3250.23	493.641	0.998913	503.72	ok
TUYYTUY	644.153	70.6013	1834.37	316.048	0.997474	284.24	ok
UTYUTYT	1112.79	270.104	2646.67	906.319	0.992983	409.64	ok
UTYTTUS	1428.69	754.157	3118.38	2227.73	0.974744	482.64	ok
UUYTUYY	865.912	59.3032	2240.53	226.786	0.999266	346.64	ok
UUYSTUS	1086.07	87.9102	2568.84	295.706	0.999178	396.92	ok
TUYSTUS	979.003	349.184	2472.27	1267.25	0.983131	381.76	ok
YTYUTUT	1381.3	247.554	3008.65	736.128	0.996885	464.4	ok
UTYYTUY	573.866	134.342	1686.56	638.16	0.987145	260.32	ok
TTYUTUY	1751.26	226.86	3459.75	592.025	0.998704	533.6	ok
USYTSSY	564.34	239.849	1683.26	1157.08	0.959536	245.92	ok
TTYSTTT	803.157	237.68	2192.09	964.941	0.985929	337.96	ok
TYYUTUY	320.049	26.8784	1164.97	181.137	0.997141	179.44	ok
UUYYTTU	480.465	42.2519	1526.9	224.624	0.997875	234.4	ok
TUYTTTU	1511.75	258.407	3178.84	731.991	0.997408	487.98	ok
STYTTYT	949.362	117.118	2408.48	430.128	0.997867	368.4	ok
TSYTTUS	478.675	113.125	1568.91	614.379	0.985371	239.76	ok
UUYUSUT	1450.84	431.296	3134.63	1259.53	0.991994	478.2	ok
UUYYSUY	438.675	49.7728	1441.93	279.36	0.996168	219.88	ok
UTYUYTY	565.691	228.326	1686.59	1100.29	0.96334	248.6	ok
STYYUYY	490.306	71.7431	1546.75	376.891	0.994192	235.66	ok
TUYUYUT	722.685	75.518	2011.36	320.888	0.998018	306.44	ok
YUYSUYY	673.952	92.1559	1955.62	411.857	0.996379	297.64	ok
UUYSSSU	1146.01	146.736	2703.93	485.679	0.998103	411.12	ok
TTYSTYT	690.143	85.3511	1946.52	371.309	0.997079	295.92	ok
TSYTUUY	425.901	63.7777	1446.55	369.454	0.993369	219.8	ok
STYSTYS	573.349	124.972	1699.41	597.182	0.98894	258.22	ok
UTYUYUS	715.311	91.1415	2016.09	391.903	0.997057	306.32	ok
UTYUYYU	1045.38	498.175	2465.45	1689.8	0.971249	374.2	ok
UTYSSSS	1182.96	188.603	2775.56	616.557	0.99717	421.04	ok
TTYYTSS	488.939	76.9721	1584.62	411.92	0.993529	240.36	ok
STYTTYS	952.417	234.296	2373.68	848.8	0.991511	359.82	ok
TTYYTYT	294.71	32.4674	1119.67	232.012	0.994841	169.72	ok
YTYUTSS	906.827	71.2124	2325.09	266.978	0.999098	352.36	ok
UUSUTUS	309.755	53.5154	1115	362.937	0.987728	168.96	ok
SUYSUUU	1016.09	131.241	2502.27	462.937	0.997821	379.16	ok
TUSUUUS	295.505	89.0819	1112.35	632.379	0.963748	153.8	ok
UTYUTTT	1437.24	179.107	3111.9	525.093	0.998572	471.2	ok
TUSUTTT	316.216	189.485	1281.74	1370.23	0.890937	147.84	ok
UUYTYST	988.977	126.524	2444.35	450.834	0.997811	369.8	ok
SUYYUYY	636.783	137.548	1835.01	623.011	0.990223	277.2	ok
SUYSUYT	869.408	73.2746	2280.1	282.573	0.998921	344.4	ok
TUYSUST	694.866	133.237	2011.98	588.936	0.993233	303.72	ok
UUYUUST	1336.14	263.028	2998.77	806.577	0.996201	452.4	ok
UTYTTSY	1518.04	343.719	3170.9	967.78	0.995481	478.16	ok
UTYUTSU	1628.6	124.824	3344.11	341.209	0.99952	504	ok
TTYSUUT	842.207	102.487	2258.96	405.302	0.997724	339.96	ok
UUYSTTS	887.239	236.21	2360.58	914.961	0.989798	354.88	ok
UTYYTTS	472.654	135.792	1485.29	720.897	0.977122	223.24	ok
SUYSSSS	884.692	226.659	2357.99	879.803	0.990497	354.4	ok
UTYSSUT	871.833	106.032	2268.97	406.348	0.997772	341	ok
TUYSUUS	953.299	210.516	2450.93	779.702	0.993392	368.24	ok
TUYSYYS	531.207	70.8678	1654.9	359.149	0.995639	248.64	ok
YTYTUYY	1012.36	194.04	2488.36	684.21	0.995182	373.82	ok
TUYSUTS	636.309	84.9793	1889.16	392.863	0.996442	283.04	ok
TTYUUYS	1301.79	196.206	2955.26	610.794	0.997727	442.76	ok
SUYSTUT	1232.82	113.432	2848.65	362.764	0.999098	426.44	ok
UUYSTSY	955.897	196.774	2462.64	729.331	0.994279	368.64	ok
YUYUTYT	1049.16	135.573	2590.78	475.013	0.99793	387.76	ok
UUYTUSS	1107.58	194.217	2688.13	662.276	0.996416	402.28	ok
UTYTYUU	495.077	72.0464	1566.94	378.007	0.994473	234.16	ok
UTYUUSS	1188.45	357.449	2822.13	1177.59	0.990263	421.72	ok
YUYSTSU	596.803	37.5685	1802.18	179.366	0.999142	268.88	ok
SUYYTST	409.269	29.9346	1404.86	177.131	0.998334	209.48	ok
SUYTUST	878.752	59.6986	2315.88	230.309	0.999315	345.08	ok
TUYUSYS	1570.58	97.2502	3297.78	272.716	0.999679	491.2	ok
YUYSUUT	787.501	109.309	2180.01	450.841	0.99686	324.56	ok
UUYTSYY	1035.67	201.059	2531.68	701.735	0.995199	376.64	ok
TUYYUSS	330.794	31.0818	1225.75	209.028	0.996654	182.32	ok
STYUTSS	1357.42	308.619	2980.95	927.375	0.994964	443	ok
UYYUTUU	315.648	66.32	1134.97	446.101	0.981962	167.88	ok
UTYTTTT	1337.75	114.055	3002.78	349.683	0.999294	445.88	ok
YUYUTTS	1012.51	150.456	2548.4	539.709	0.997205	378.24	ok
TTYSSST	1189.84	308.909	2834.15	1019.71	0.992732	420.64	ok
YUYYUUY	456.207	55.8552	1540.42	314.523	0.995877	228.58	ok
TTYUTSS	1707.72	442.852	3507.72	1197.88	0.994926	520.32	ok
STYUTYU	1128.12	231.66	2732.02	784.895	0.995193	405.16	ok
TTYTUSS	1029.67	342.404	2613.25	1230.15	0.986638	387.52	ok
UYYUSSS	416.534	106.475	1472.76	637.943	0.981091	218.32	ok
SUYUTSS	1346.66	363.974	2972.91	1100.22	0.992856	440.36	ok
TTYUTSY	1446.32	136.192	3135.72	399.078	0.999198	464.4	ok
SUYUTST	1351.72	388.386	3059.42	1195.18	0.992166	452.88	ok
TUYUTYU	1243.55	354.964	2907.42	1142.69	0.991648	430.36	ok
YUYTTUY	1395.14	107.277	3089.4	322.221	0.999448	457.06	ok
YTYTTYT	842.677	118.284	2286.05	471.489	0.997039	337.94	ok
TUYTYSU	657.632	154.675	1890.12	692.124	0.98913	279.36	ok
UUYSUYU	686.579	161.285	2023.5	724.373	0.989945	299	ok
TUYSUYS	603.938	149.739	1875.54	725.776	0.987446	276.88	ok
TTYTUST	1069.57	210.531	2598.3	725.109	0.995288	383.32	ok
UUYYTTT	526.21	69.4843	1694.13	361.031	0.995857	249.92	ok
YUYSYYU	452.896	44.2569	1533.62	250.317	0.997356	226	ok
YUYTUUU	1219.67	113.724	2845.29	367.296	0.999069	419.1	ok
STYUUSY	923.832	139.483	2432.86	530.255	0.996867	357.68	ok
SUYSTYU	595.423	206.515	1884.98	1018.75	0.975589	277.08	ok
UTYTUUS	1625.72	180.932	3382.42	499.826	0.999013	497.08	ok
TUYUUSU	1210.17	152.412	2850.57	496.796	0.998329	418.72	ok
YTYUTTT	1065.97	137.095	2647.02	480.267	0.998021	388.72	ok
TUYUUSS	1371.2	346.319	3105.3	1062.51	0.99408	455.92	ok
UUYYUUY	556.086	55.3786	1752.84	278.524	0.997753	257.32	ok
SSYUUUY	491.08	116.581	1568.86	617.141	0.98535	229.96	ok
UUYTSSS	1874.97	720.603	3746.65	1869.09	0.990015	549.16	ok
YTYSUUY	765.625	61.9816	2140.73	259.612	0.998907	313.04	ok
TUYTSTU	1269.4	164.945	2947.81	525.585	0.998314	429.72	ok
TTYUTTY	1659.79	197.95	3464.98	545.687	0.998908	504.64	ok
UTYSUUT	841.428	230.883	2319.11	931.152	0.988963	337.48	ok
UUYUUSY	1351.89	165.771	3074.47	511.961	0.998582	447.24	ok
TUYSYUT	433.013	36.829	1483.09	213.216	0.997927	215.72	ok
TTYSUTS	670.45	74.8366	1990.37	340.298	0.997696	289.48	ok
TTYTUTS	953.354	227.774	2507.33	857.578	0.992633	364.2	ok
UUYTYUY	535.078	94.1303	1676.88	477.735	0.992747	243.56	ok
TUYSUUY	973.264	80.2238	2502.08	295.417	0.999109	363.28	ok
USYUUUU	389.563	30.9664	1383.39	190.642	0.998008	200.8	ok
TUYUYYY	554.789	56.6052	1748.96	284.936	0.99766	253.64	ok
UTYSTTT	864.47	292.525	2382.05	1170.51	0.983888	345.44	ok
UUYSUSU	702.779	67.5708	2032.88	297.432	0.998344	294.8	ok
TTYYUTU	323.922	74.206	1181.59	498.361	0.979911	171.2	ok
TTYUYSS	841.655	114.067	2269.41	452.876	0.997256	328.68	ok
UTYSYST	669.884	98.1986	1998.91	448.227	0.996059	289.16	ok
SUYUUYS	1426.92	527.443	3223.1	1599.71	0.98811	465.76	ok
UTYUYTT	646.164	79.1808	1957.32	369.309	0.997152	282.52	ok
UTYTTSU	1336.79	247.254	3074.46	772.236	0.99678	443.76	ok
YTYTUUU	906.019	134.231	2422.81	518.772	0.996978	349.42	ok
SUYTUSS	827.254	148.161	2245.35	593.973	0.995133	323.72	ok
USYUTUS	502.073	73.3262	1620.88	387.84	0.994664	233.56	ok
TUYTUYS	1111.31	291.791	2765.29	1012.6	0.992282	398.36	ok
STYTUUY	1526.44	1013.6	3400.14	2994.22	0.965359	489.62	ok
TUYSTYY	631.322	88.9216	1934.76	421.134	0.996133	278.52	ok
UYYTTUY	307.79	29.7086	1170.86	208.821	0.996252	168.44	ok
STYTYYT	571.003	56.4664	1808.76	282.465	0.997896	259.98	ok
SUYTUTT	1129.53	137.178	2765.74	468.428	0.998372	397.52	ok
TTYYTUS	619.361	85.1905	1905.05	406.931	0.99625	273.8	ok
YTYSUUT	782.745	127.325	2171.33	526.863	0.995719	311.92	ok
TTYSUSU	724.071	44.2979	2099.02	193.512	0.999359	301.52	ok
TSYUUTY	288.444	32.7639	1138.47	241.619	0.994673	163.48	ok
TUYSSYS	955.005	188.935	2468.43	702.122	0.994803	354.44	ok
YUYUTUS	1337.34	103.24	3066.6	321.688	0.999439	439.56	ok
YUYUSST	1232.84	244.871	2947.52	803.336	0.996028	422.2	ok
TTYUYYT	884.336	143.99	2358	559.14	0.996235	337.32	ok
TUYTUUT	1556.31	990.178	3450.9	2901.94	0.969142	493.6	ok
UTYTYYU	697.386	259.228	1992.66	1134.13	0.975398	284.88	ok
TSYTTTS	360.101	74.3045	1353.87	488.206	0.986212	193.4	ok
SUYUYUT	753.8	88.0769	2171.33	378.45	0.997788	310.12	ok
STYTUUT	1346.79	258.679	3120.29	810.968	0.996591	444.9	ok
TSYTUUT	394.371	49.747	1390.53	303.513	0.995072	198.16	ok
UTYTTUY	2088.5	203.323	3993.64	497.961	0.999429	569	ok
TUYSSYY	650.482	125.469	1933.14	576.391	0.992894	275.36	ok
UTYTUSY	1145.44	168.397	2781.38	569.419	0.997642	396.08	ok
SUYYUUT	583.123	63.493	1825.89	312.995	0.997498	259.92	ok
STYSYYS	535.1	116.778	1704.64	599.132	0.988912	242.56	ok
TUYTSYS	1195.45	84.6119	2877.14	281.134	0.999478	409.34	ok
YUYSSSU	693.825	82.1729	2063.85	370.237	0.997537	293.32	ok
YUYUSSY	1344.72	120.961	3099.4	377.869	0.999246	440.46	ok
SUYTTUS	1897.81	1140.51	3871.57	2999.19	0.977164	550.08	ok
UUYYSSS	756.597	43.6976	2174.73	187.272	0.999456	308.84	ok
UUYSUSY	724.809	42.3884	2118.06	186.152	0.999416	300.72	ok
TTYYUUU	444.493	56.328	1549.59	326.798	0.995706	219.96	ok
TTYYUYU	342.32	68.2105	1250.37	448.717	0.985784	177.44	ok
TTYYUUS	411.943	157.508	1526.26	976.378	0.960563	216.56	ok
UYYUTTT	232.599	44.7999	959.804	370.511	0.980943	132.92	ok
TUYTYST	787.97	73.0631	2240.18	307.008	0.998664	317.52	ok
SUYUUTT	1187.8	187.237	2846.4	621.124	0.997398	403.36	ok
TUYSUTT	658.016	148.862	1949.2	679.865	0.990342	276.16	ok
YTYTTYU	788.175	99.1575	2209.23	412.474	0.997507	312.9	ok
TUYUUYS	1391.15	102.712	3156.15	314.457	0.999513	446.96	ok
STYYSTY	378.153	31.4398	1381.77	199.249	0.997786	195.66	ok
YTYTUTT	843.831	89.0694	2339.54	360.443	0.998389	331.18	ok
SUYUUUT	1581.09	112.473	3415.37	321.876	0.9996	482.72	ok
SUYTSYU	954.921	66.2737	2518.49	249.918	0.999375	355.88	ok
UTYSTYT	752.795	88.2842	2151.57	377.417	0.997746	303.96	ok
STYYUUS	495.129	37.9075	1655.09	206.126	0.998564	233.72	ok
TTYSUTT	613.251	74.9198	1906.38	361.608	0.997065	269.12	ok
TTYYUTT	309.302	48.5128	1175.07	340.066	0.99048	165.8	ok
TTYTTTU	1456.26	229.753	3272.13	690.724	0.997885	461.64	ok
TUYUYUY	734.52	149.208	2102.61	643.3	0.993067	296.28	ok
TTYSUTU	565.271	131.727	1837.79	672.813	0.988616	258.84	ok
YTYTTUY	1375.86	243.632	3169.71	756.642	0.997195	445.94	ok
TUYTTUU	1951.24	553.101	3908.61	1425.35	0.994938	549.6	ok
UUYUYUY	683.642	201.359	1989.97	897.827	0.984384	279.8	ok
UTYYTTT	538.111	52.0599	1743.57	269.623	0.997884	245.08	ok
TTYTUYS	1096.76	95.8919	2760.93	336.794	0.999143	387.88	ok
SUYUYUY	907.985	210.035	2402.58	805.109	0.992706	337.52	ok
TUYSTYU	716.898	55.6727	2104.57	246.089	0.99897	295.64	ok
UUYSTYU	676.143	108.8	2066.6	503.49	0.995391	290.28	ok
STYUYUY	942.131	143.931	2498.52	546.964	0.996976	350.84	ok
TTYUTTS	1719.94	448.837	3641.94	1241.23	0.995143	511.36	ok
YUYSUYU	608.677	43.8373	1902.88	212.908	0.998962	267.1	ok
YTYUTYU	893.45	62.6645	2422.35	245.557	0.999322	339.8	ok
UUYUYUS	867.502	109.761	2400.06	440.039	0.997771	336.64	ok
TTYSTSY	920.054	101.696	2490.54	394.82	0.998382	349.32	ok
YTYUSTS	1108.13	484.809	2689.97	1653.21	0.97858	377.28	ok
SUYTSSU	1455.06	264.461	3248.7	791.352	0.997186	455.52	ok
USYUUUT	457.883	50.0236	1562.96	283.31	0.99686	218.96	ok
UTYSYYU	605.193	64.084	1892.1	311.826	0.997759	265.04	ok
YUYSTUU	778.418	180.46	2251.29	770.288	0.991692	315.34	ok
UUYTTYT	1216.82	122.683	2919.91	404.912	0.998969	408.8	ok
YTYUUTT	1008.79	176.754	2598.87	645.557	0.996266	363.8	ok
SUYTUUU	1544	334.807	3417.59	981.662	0.996282	478.4	ok
SUYTTTS	1554.35	220.69	3401.67	640.445	0.998399	475.64	ok
UTYYUSY	372.081	73.1368	1347.24	463.631	0.987583	188.36	ok
TTYTTUY	1897.91	695.304	3883.17	1832.66	0.99149	542.8	ok
SSYTUUY	455.73	132.368	1542.22	746.716	0.977814	215.52	ok
TTYYTST	491.957	47.1868	1648.71	257.58	0.997746	230.28	ok
TTYTYTT	518.718	114.546	1689.85	602.749	0.988758	235.88	ok
YUYUTSU	1086.6	88.6743	2734.41	312.12	0.999247	381.48	ok
YUYSYTS	434.251	44.0635	1532.5	259.799	0.997189	213.72	ok
YUYUYTY	793.601	83.7367	2272.6	352.938	0.998306	316.9	ok
SUYYSST	510.211	106.843	1662.45	565.448	0.989338	231.76	ok
STYTTTS	1321.23	149.263	3102.77	474.963	0.998815	432.38	ok
YTYUTSU	1081.27	246.443	2709.21	865.785	0.994085	377.44	ok
TTYSSSY	1159.32	131.572	2872.88	450.289	0.998646	400.12	ok
YUYUTYS	822.33	113.76	2294.55	465.903	0.997163	319.44	ok
TUYYUUY	568.3	67.6589	1838.1	343.775	0.996998	255.88	ok
UTYSSTS	880.803	134.749	2445.17	539.241	0.996812	340.24	ok
UTYTTYU	1034.02	110.651	2681.51	403.426	0.998663	373.08	ok
UTYYTUU	544.517	54.4393	1795.62	284.174	0.997823	249.8	ok
STYTTUY	1755.37	823.364	3738.56	2277.26	0.985065	519.98	ok
STYUTST	1391.98	411.32	3238.23	1283.41	0.992504	450.34	ok
STYTYUU	699.33	92.7698	2077.42	416.585	0.996984	288.88	ok
TUYSUSY	712.817	178.244	2162.37	807.563	0.989727	300.68	ok
TUYUSUU	1832.34	1292.02	3639.14	3351.8	0.966951	505.76	ok
UUYSTSS	1075.8	396.43	2798.08	1433.62	0.985133	388.8	ok
TUYYSTS	540.703	162.47	1830.1	865.087	0.981073	254.12	ok
YTYYUUY	444.139	28.9263	1568.83	169.307	0.998863	217.68	ok
TUYSUTU	618.999	69.6255	1925.77	335.242	0.99755	267.2	ok
SUYYTUU	589.944	51.1135	1884.64	254.456	0.998478	261.32	ok
TUYUSTS	1688.51	345.415	3592.75	962.729	0.996995	497.92	ok
SUYSTYT	685.353	117.51	2097.23	542.014	0.994947	290.56	ok
UUYUSTY	1764.85	248.428	3700.05	677.882	0.998642	512.04	ok
SUYSSTS	825.198	75.4604	2320.15	310.416	0.998773	320.76	ok
YTYUYUU	650.111	182.681	2046.7	873.355	0.986171	282.9	ok
TUYYSSY	697.476	163.729	2122.89	748.394	0.990706	293.24	ok
YUYSTST	717.884	143.337	2171.01	646.636	0.993451	299.88	ok
TTYSYYT	583.047	87.4823	1849.91	435.135	0.99539	255.48	ok
SUYTTTY	1586.78	142.852	3453.01	410.816	0.999374	476.76	ok
STYYTUS	570.819	33.5138	1846.01	170.025	0.999272	254.82	ok
UUYTYYT	920.955	99.2628	2483.97	384.259	0.998483	342.88	ok
TUYYUSY	448.233	36.9966	1582.35	215.768	0.998207	218.36	ok
YTYUUSS	800.401	97.2022	2294	408.927	0.997804	315.98	ok
SUYUSSS	1820.45	521.55	3715.93	1384.32	0.994462	511.48	ok
USYTTUS	513.284	98.143	1691.63	522.267	0.991472	232.76	ok
YTYUUSY	1019.57	83.5207	2656.32	306.691	0.999198	365.48	ok
TTYSTUY	1111.58	185.166	2834.69	654.362	0.997012	389.92	ok
SUYSUTT	706.5	104.216	2145.93	473.848	0.996377	294.84	ok
YUYTTSY	1131.25	103.348	2851.82	360.486	0.999108	391.62	ok
USYTTUY	523.282	93.2893	1785.84	504.876	0.993014	245	ok
TUYTSUY	1408.32	249.613	3257.36	773.286	0.99732	446.72	ok
USYTUTT	272.676	50.1479	1093.33	381.848	0.985445	149.84	ok
UYYTTTT	248.153	65.1861	1054.92	533.968	0.969358	134.48	ok
YTYSSSU	692.83	59.1627	2106.2	270.747	0.998753	288.4	ok
UTYYSSU	632.768	57.8999	1994.1	279.322	0.998443	273.04	ok
YTYTTTS	1089.09	115.26	2769.71	408.629	0.998754	379.04	ok
TUYSSTT	1076.98	177.085	2780.23	636.666	0.997034	379.88	ok
SUYUTSY	1432.93	398.153	3330.64	1233.15	0.993627	454.32	ok
STYUSYY	812.929	233.646	2376.66	992.577	0.988233	324.18	ok
TTYUTYY	1160.12	163.922	2916.17	566.921	0.997963	397.72	ok
YUYYTUU	543.944	86.2802	1785.66	449.176	0.994526	243.5	ok
STYTTYY	1052.88	124.243	2750.2	453.247	0.998417	375	ok
UUYTUUS	1780.35	569.553	3782.41	1567.48	0.993171	515.28	ok
SUYUTYS	1080.38	146.589	2793.04	527.164	0.997972	380.36	ok
TUYYSSU	761.511	75.9817	2228.62	329.159	0.99844	303.24	ok
TTYSSSS	1264.98	280.91	3024.77	915.814	0.99529	411.32	ok
UUYUUYT	1383.07	285.243	3257.89	899.911	0.996382	442.92	ok
STYSUSY	628.153	80.0446	1972.37	386.068	0.996918	267.94	ok
SUYUTUS	2153.51	953.65	4235.74	2374.14	0.989242	575.4	ok
UYYUUUT	286.216	57.883	1134.35	429.246	0.983287	153.92	ok
SUYTTSU	1199.17	170.698	2976.25	579.94	0.997984	403.64	ok
UUYYSUS	453.91	73.3221	1625.5	429.769	0.993541	220.4	ok
UTYUYUU	660.443	88.2671	2048.1	415.58	0.996849	277.68	ok
UTYTUST	1309.22	184.535	3135.96	597.394	0.9982	424.88	ok
TTYYTTY	458.536	35.7167	1623.08	207.035	0.998465	219.88	ok
UUYUSTS	1565.79	498.381	3511.03	1471.35	0.992452	475.52	ok
UTYTTYY	1090.55	74.3054	2804.55	265.534	0.999495	379.6	ok
USYTSSU	546.737	69.7587	1834.82	367.978	0.996608	248.28	ok
TUSTUUY	285.82	91.455	1176.78	694.372	0.961973	144.88	ok
STYUTTU	1390.82	463.759	3293.95	1467.28	0.990743	445.32	ok
TYYTUUT	255.544	27.3969	1074.17	220.274	0.994789	144.96	ok
USYUTUY	553.47	62.9057	1817.22	325.667	0.997262	245.16	ok
TYYTTUY	285.883	17.6054	1173.2	133.391	0.998467	158.24	ok
TUYYUSU	418.577	56.0932	1503.31	338.88	0.994965	202.72	ok
UYYTUUS	329.754	152.395	1351.19	1092.08	0.935479	155.72	ok
UTYTUYY	959.933	184.475	2631.47	714.536	0.995552	354.32	ok
SUYUUTU	1253.73	113.882	3067.82	378.625	0.999224	412.88	ok
SUYTUYT	1725.43	376.997	3731.34	1059.18	0.996742	502.08	ok
USYTUUT	437.159	56.2819	1568.02	334.567	0.995595	210.96	ok
UUYSTUU	1200.72	402.241	3038.78	1386.38	0.989243	408.72	ok
SUYSTUS	1154.29	167.013	2935.42	583.399	0.997871	394.68	ok
TTYSTSU	981.103	195.198	2665.9	746.852	0.995342	358.36	ok
UTYSTUU	1088.37	173.478	2838	626.672	0.997261	381.4	ok
UUYYTSY	531.534	40.5539	1797.08	216.981	0.998731	241.44	ok
UUYSUTY	807.086	193.215	2300.95	807.857	0.991582	309.04	ok
TUSUUUY	263.915	48.4599	1143.62	391.649	0.986389	153.56	ok
YUSTTUT	208.968	101.805	1041.98	983.118	0.902305	107.12	ok
UUYSSYT	914.017	265.116	2584.77	1064.44	0.989473	346.76	ok
YUYSTTT	945.52	138.809	2600.85	541.196	0.997324	348.84	ok
UUYSTYT	802.636	231.163	2386.89	997.688	0.988295	320.08	ok
UUYYSST	752.474	219.489	2299.39	983.84	0.987216	307.8	ok
YTYSUYY	762.566	260.737	2208.31	1120.7	0.981889	295.56	ok
USYUSTT	492.283	102.393	1670.5	563.424	0.989792	223.52	ok
STYTUTY	1392.61	712.724	3182.37	2193.53	0.977793	425.68	ok
UUYUYSS	1384.15	420.045	3206.21	1308.08	0.992159	428.8	ok
UTYUTSY	1754.72	959.165	3825.43	2702.27	0.980645	511.32	ok
YTYUUYT	1172.36	100.714	2958.35	348.411	0.999263	395.36	ok
UUYSSYU	778.017	136.216	2325.28	595.263	0.995486	310.64	ok
YTYUUUU	1333.42	125.748	3184.17	404.361	0.999216	425.26	ok
UUYUTYS	1319.75	552.756	3233.22	1816.96	0.984935	431.72	ok
UUYTSTU	1325.22	724.016	3258.86	2384.44	0.97498	435.08	ok
SUYTTYY	1104.01	159.2	2867.39	571.32	0.997787	382.56	ok
SUYUUYT	1895.88	406.831	3959.51	1090.14	0.997147	528	ok
STYSTUT	1095.68	121.497	2840.2	436.224	0.998691	378.74	ok
TUYUTST	1832.6	809.756	3919.08	2226.56	0.987756	522.6	ok
SUYUSTS	1380.36	304.084	3279.32	966.075	0.995933	437.16	ok
UUYTTUS	2548.09	1069.07	4590.97	2400.66	0.991771	612	ok
SSYTTTT	356.481	37.1726	1392.3	251.103	0.996593	185.46	ok
TUYSSTS	1097.07	93.6894	2834.93	335.49	0.99922	377.6	ok
SSYUUTU	297.315	89.591	1214.31	666.518	0.967046	151.36	ok
UUYUYSU	1108.16	329.299	2897.04	1186.41	0.990964	385.4	ok
YTYSTTU	621.529	98.5456	2021.58	488.595	0.995414	268.88	ok
TTYSUST	818.257	96.1921	2393.98	408.105	0.998044	318.4	ok
TTYSTST	1036.01	165.16	2723.5	607.928	0.997133	362.2	ok
TUYSTTS	1015.84	214.577	2746.81	810.593	0.994994	365.28	ok
TUYSSUS	1066.37	239.3	2815.63	877.107	0.994589	374.36	ok
YUYYTUY	525.72	27.846	1798.01	150.688	0.999379	239.04	ok
YTYUSSS	1176.14	98.6589	2973.14	341.484	0.999301	395.22	ok
STYUUST	955.606	222.367	2644.31	868.302	0.99352	351.46	ok
UUYSTTT	1074.2	109.021	2823.05	397.458	0.998881	374.96	ok
STYUUYT	1779.26	190.823	3807.21	528.203	0.999244	505.54	ok
UTYUTTY	1790.29	393.778	3834.17	1089.31	0.996856	509.08	ok
UTYSSST	1287.47	340.78	3178.34	1133.36	0.99376	421.92	ok
SUYSUYU	984.563	160.374	2654.65	609.555	0.99685	352.4	ok
SUYUSUY	1691.35	313.642	3655.23	884.535	0.997631	485.04	ok
UUYTTSU	1623.41	226.405	3616.34	659.693	0.998605	479.52	ok
TUYYTSY	572.148	46.4513	1909.65	240.589	0.998688	253.2	ok
SUYTUUS	1593.42	388.496	3597.83	1148.68	0.995689	476.88	ok
YUYUTST	1103.88	180.679	2881.17	650.805	0.997205	381.84	ok
UUYYUST	441.465	158.505	1563.73	931.382	0.967269	203.44	ok
TSYUUUY	439.52	51.3042	1619.14	309.762	0.996554	214.44	ok
TTYUYTS	672.518	269.164	2170.58	1296.01	0.974284	287.44	ok
UTYYSTU	463.919	50.1364	1641.65	289.403	0.997131	217.24	ok
TUYSTST	1057.02	453.339	2861.25	1696.51	0.980588	378.6	ok
SUYSTTY	1176.66	429.737	3018.45	1503.8	0.987184	399.28	ok
TTYTTYS	1198.71	212.455	3023.82	730.759	0.996959	399.92	ok
TUYSTYT	747.322	180.552	2292.15	813.058	0.991154	303.08	ok
YUYTTST	1033.93	389.008	2795.85	1462.88	0.984645	369.54	ok
SUYUTUT	1938.99	857.976	4070.19	2297.78	0.988462	537.72	ok
YTYSYSY	369.886	94.7895	1470.24	638.854	0.98092	194.2	ok
YUYTSYY	728.556	110.381	2194.14	494.342	0.996349	289.64	ok
TUYTTYU	1171.2	117.731	2973.58	409.264	0.999004	392.48	ok
UUYUYYS	982.585	149.867	2693.92	576.966	0.997289	355.52	ok
STYTUYY	1426.81	463.613	3395.66	1463.67	0.991483	448.04	ok
UTYYSSY	592.372	48.4502	1938.3	244.854	0.998706	255.68	ok
TSYUUUT	434.893	36.6378	1595.73	221.442	0.998162	210.48	ok
UUYYSTU	522.103	57.3775	1778.92	310.415	0.997377	234.48	ok
STYUTUY	1971.49	1013.41	4113.36	2691.88	0.984792	542	ok
STYYUUU	387.781	114.973	1533.21	759.343	0.976036	201.96	ok
YUYYTUS	547.014	82.7201	1824.66	434.498	0.995197	240.22	ok
YUYYUUU	564.427	103.66	1857.77	534.147	0.993131	244.5	ok
TTYSTYY	604.525	120	2013.89	610.095	0.992733	264.84	ok
SUYSYUS	648.001	118.677	2038.71	567.675	0.994061	268.08	ok
YTYSTST	665.252	161.505	2142.67	779.025	0.990159	281.74	ok
YSYUTTY	338.185	48.9283	1322.53	337.331	0.992977	173.72	ok
TYYTUUY	284.477	50.739	1175.81	386.858	0.987331	154.44	ok
SUYSUUT	1209.03	234.873	3071.52	810.496	0.996419	403.32	ok
SUYUYTT	939.452	304.83	2550.2	1179.12	0.987053	334.8	ok
TTYTUYY	886.934	169.761	2547.96	695.091	0.995346	334.44	ok
TTYUYUT	740.712	79.9348	2245.4	357.902	0.99822	294.68	ok
TTYSUYS	655.539	106.132	2113.07	514.49	0.995511	277.24	ok
UTYTSSS	2097.71	323.498	4223.46	824.857	0.998689	553.64	ok
YTYTTTY	1102.68	186.818	2905.76	677.94	0.997028	380.8	ok
TYYUTTY	228.392	13.0036	1032.03	114.249	0.998429	135.12	ok
SYYSUSY	169.774	108.779	986.165	1252.04	0.828027	83.28	ok
SUYSUSU	625.256	31.9583	2024.76	157.678	0.999522	264.96	ok
YTYYTUS	409.686	53.3352	1556.13	336.643	0.99545	203.6	ok
YUYTTYT	860.92	101.957	2492.27	423.232	0.998145	325.9	ok
YTYUYUY	880.911	498.056	2434	1986.32	0.958958	313.72	ok
STYTUSY	985.908	88.9845	2686.12	340.693	0.999046	351.12	ok
STYTUUU	1387.83	466.838	3359.69	1502.87	0.990816	438.96	ok
SUYUUTS	1091.73	97.5667	2876.3	354.896	0.999165	375.68	ok
YUYTSSY	1083.45	138.785	2850.42	505.269	0.99826	372.18	ok
TYYTUUU	247.156	24.641	1071.07	204.488	0.995516	139.72	ok
UUYYUSU	434.746	66.4191	1574.24	398.045	0.993883	205	ok
SUYUTYY	1344.58	424.011	3306.16	1391.61	0.991704	430.2	ok
TUYYUTU	385.856	127.205	1450.4	814.737	0.969438	181.84	ok
SUSUUUU	371.018	220.224	1526.09	1515.62	0.914879	162.24	ok
TTYUTYU	1288.59	262.195	3202.61	876.31	0.996351	416.6	ok
SUYYTTY	635.772	73.3753	2047.45	358.793	0.997599	266.32	ok
UUYSSST	1379.33	369.037	3348.6	1192.31	0.994158	435.52	ok
UUYTUST	1333.4	338.276	3277.93	1112.2	0.994555	426.24	ok
TTYTUTU	949.971	208.202	2666.49	822.845	0.994388	346.24	ok
UTYSUTY	667.995	161.318	2161.55	779.712	0.990503	280.48	ok
SUYUTTS	1716.2	453.037	3800.46	1298.27	0.995409	493.12	ok
SYYTTUT	351.224	107.471	1365.85	727.98	0.970726	171.44	ok
USYTUUS	464.082	75.0399	1656.63	435.599	0.993661	214.84	ok
SSYTTUT	517.399	50.8371	1818.72	281.692	0.997943	235.6	ok
YTYSTUT	931.315	63.8861	2607.77	253.373	0.999422	337.76	ok
STYTTTU	1355.75	278.452	3310.92	907.354	0.996494	428.7	ok
STYSUYY	949.731	257.267	2689.46	1023.45	0.991389	348.04	ok
USYTTTT	480.043	125.692	1664.35	707.53	0.983968	215.36	ok
SUYTYUT	770.888	100.781	2338.39	446.274	0.997534	302.56	ok
TUYYTUS	796.766	181.248	2337.45	776.3	0.992575	302.28	ok
SUYTYYT	698.32	115.475	2219.3	543.902	0.99566	286.96	ok
UUYUUTU	1013.08	178.275	2772.48	679.962	0.996592	358.48	ok
TUYTYYT	686.694	103.513	2181.69	489.879	0.996323	282.04	ok
TUYUYYS	977.424	73.6434	2689.91	284.7	0.999339	347.68	ok
TSYUTYU	342.408	74.2749	1335.53	508.862	0.984669	172.56	ok
YUYSTUS	977.355	136.043	2707.52	528.507	0.997764	349.76	ok
TUYTTSU	1680.7	566.076	3771.8	1646.63	0.992423	487.2	ok
YTYUTSY	1143.7	295.335	3011.23	1061.34	0.993521	388.56	ok
TTYUSST	2036.69	764.26	4224.03	2007.31	0.992264	544.92	ok
SUYSUYS	858.02	134.476	2516.34	564.029	0.996798	324.6	ok
TSYTTUU	519.699	53.4315	1823.43	295.272	0.997758	234.92	ok
TUYYTYT	383.193	63.9143	1465.76	414.994	0.991949	188.8	ok
YTYTSYU	786.539	146.88	2389.35	647.381	0.995065	307.74	ok
TSYUUUU	481.271	39.3472	1719.99	225.792	0.998467	221.52	ok
UTYSUTT	695.025	46.1555	2192.85	216.59	0.99929	282.04	ok
TYYTTUU	305.778	80.8572	1247.05	594.505	0.975235	155.76	ok
TTYYTTT	516.331	61.3709	1822.27	341.212	0.997008	234.24	ok
UUYSTYY	673.95	141.809	2184.1	684.333	0.992864	280.64	ok
TYYUSUU	382.8	90.9886	1440.93	584.974	0.983674	185.04	ok
STYSUYU	832.424	135.989	2482.81	582.223	0.996434	318.72	ok
STYSTYT	695.761	222.803	2253.3	1064.68	0.984208	289.2	ok
UYYUSUU	337.598	37.2397	1349.33	260.437	0.996051	173.16	ok
STYUUYY	1925.25	402.788	4085.63	1089.71	0.997432	524.18	ok
UUYYUYU	443.818	107.634	1603.19	639.416	0.985241	205.4	ok
UTYYTSU	495.265	37.0246	1767.82	210.275	0.998763	226.36	ok
TTYUYTU	585.904	173.395	1930.97	883.671	0.983382	247.04	ok
UYYTTUT	303.958	34.7544	1289.17	262.39	0.995402	164.88	ok
YUYTTYS	707.973	85.8289	2215.53	398.275	0.997677	283.34	ok
UTYTYSS	911.294	184.786	2615.41	750.569	0.995058	334.12	ok
TYYTUYU	194.285	22.794	940.94	223.125	0.992604	120.16	ok
UUYSUSS	735.832	248.336	2334.15	1150.56	0.983362	297.92	ok
YUYSSST	890.719	200.985	2543.6	818.424	0.993565	324.44	ok
STYSUSU	673.55	141.765	2122.64	670.962	0.992644	270.68	ok
TUYTYTY	495.739	148.237	1711.45	823.094	0.979933	218.24	ok
STYSTST	751.589	84.6278	2330.03	383.384	0.998135	297.04	ok
UUSTTUS	374.19	89.8755	1421.87	586.128	0.98316	181.24	ok
UUYSTTY	1084.2	148.246	2914.95	548.437	0.998068	371.48	ok
YUYYTSU	362.941	36.0091	1462.25	246.474	0.997065	186.34	ok
TUYYSUS	581.938	149.703	1923.35	766.055	0.987284	245.08	ok
STYTSSY	1312.24	77.7723	3247.91	258.001	0.999699	413.58	ok
UTYYTYT	345.097	33.9556	1382.62	235.897	0.996938	176.04	ok
YUYTTUS	1395.33	522.909	3424.97	1699.37	0.988974	435.9	ok
STYSUUS	897.723	157.772	2609.28	649.415	0.996197	331.84	ok
YTYUSSY	1361.14	241.415	3301.22	781.792	0.997399	419.82	ok
UUYTUYS	1246.65	122.993	3147.33	419.299	0.999127	400.24	ok
YUYUUYU	1206.19	162.974	3074.43	564.117	0.998297	390.92	ok
SYYTUUY	295.146	53.7043	1289.26	417.581	0.988139	163.8	ok
TUYSUYU	714.42	172.279	2285.75	809.922	0.991203	290.32	ok
UTYUTYU	1384.85	197.395	3380	639.796	0.998364	429.12	ok
TUYYUTT	367.723	43.9446	1437.9	293.715	0.99574	182.44	ok
UUYUSTT	1668.7	195.153	3738.87	567.827	0.999088	474.36	ok
SUYTTUT	2007.42	709.586	4224.81	1891.17	0.993094	535.96	ok
TTYUUSY	1423.32	497.744	3475.81	1603.97	0.990608	440.92	ok
YUYUSYS	749.587	122.257	2344.09	557.722	0.996122	297.26	ok
YUYUUTU	960.23	143.707	2709.95	568.613	0.997439	343.36	ok
UUYTYTU	482.694	50.7302	1735.85	292.034	0.997507	219.88	ok
UTYUSUU	1658.44	230.285	3734.83	673.621	0.998707	472.84	ok
YTYUUTS	974.783	208.563	2745.81	820.842	0.994931	347.32	ok
TSYUTTU	479.105	43.01	1739.33	249.78	0.99818	220	ok
SUYYUYU	588.661	96.1817	1965.27	493.796	0.994944	248.52	ok
UUYUYUT	822.501	79.6807	2469.02	343.872	0.998754	312.12	ok
TUSTTST	274.488	48.0392	1161.77	376.851	0.988028	146.84	ok
TSYUTUU	599.043	128.783	1987.32	654.717	0.99155	251.16	ok
UTYYSUT	516.483	49.1745	1828.62	273.964	0.998108	230.96	ok
SUYUTSU	1385.57	278.276	3347.25	894.744	0.996734	422.68	ok
UUYTSYU	1282.11	365.822	3245.5	1241.4	0.993069	409.48	ok
YUYSTUY	1034.32	219.007	2869.42	839.343	0.995239	361.96	ok
STYTUTS	1201.49	151.632	3081.2	527.791	0.998528	388.66	ok
TTSUTTS	242.2	81.2918	1121.04	707.366	0.955518	126.64	ok
YTYSUSY	585.308	140.568	2028.28	741.765	0.989496	255.76	ok
YUYTYYY	544.696	89.0143	1881.06	479.327	0.994572	237.14	ok
STYYSST	512.07	50.5349	1829.67	284.079	0.997928	230.54	ok
UTYUYSS	1269.81	317.209	3221.88	1080.8	0.994665	405.96	ok
STYTTST	1391.6	323.868	3353.09	1038.22	0.995631	422.34	ok
STYSUTT	653.246	78.4634	2117.4	382.244	0.997584	266.64	ok
USYSUUY	331.721	32.8982	1351.34	234.37	0.996793	170.08	ok
TTYYUST	391.191	67.3722	1494.4	433.854	0.991634	188	ok
UTYUYYT	1019.32	445.745	2875.67	1736.29	0.980183	361.52	ok
UTYYTST	493.162	85.8826	1817.11	498.971	0.993508	228.36	ok
YTYTYYY	552.366	40.229	1918.28	216.489	0.998949	241.02	ok
TUSUTSS	383.675	89.3716	1463.5	578.983	0.984737	183.76	ok
SUYTYTT	765.17	226.998	2305.73	1002.58	0.987261	289.28	ok
YUYTUTU	1229.88	700.812	3055.59	2368.04	0.970945	383.24	ok
USYUTTU	456.073	48.8725	1711.4	294.964	0.997326	214.64	ok
UYYSUSU	145.395	24.2431	787.854	286.912	0.980725	98.8	ok
YTYUYTT	676.779	225.013	2123.23	1060.09	0.982133	266.16	ok
YTYSTTY	681.382	66.994	2208.65	322.298	0.998456	276.8	ok
TUYYTUU	711.38	89.3004	2263.37	418.681	0.997594	283.56	ok
TUSSTUU	252.691	94.694	1169.54	810.174	0.948295	128.48	ok
UUYYSTT	519.016	52.3796	1843.14	291.953	0.997899	230.76	ok
TSYUUTS	279.966	24.1381	1220.31	191.281	0.997187	152.76	ok
SUYSYUT	642.653	202.873	2064.78	987.155	0.983105	258.4	ok
YUYUSYT	913.261	163.882	2667.36	673.883	0.996159	333.8	ok
TTYSYUT	459.607	54.7089	1713.09	327.865	0.996744	214.32	ok
UTYTUYT	1282.32	296.607	3273.29	1012.94	0.995487	409.32	ok
TYYTTTT	234.092	27.7893	1059.31	241.9	0.993533	132.44	ok
USYUTST	553.778	39.9941	1922.84	215.025	0.998979	240.24	ok
UTYTSUT	1433.14	139.026	3461.14	443.482	0.999282	432.12	ok
TYYUTUS	288.24	23.9699	1263.59	188.487	0.997495	157.72	ok
YTYYTUU	470.99	143.213	1688.45	829.512	0.978645	210.7	ok
SUYSYUU	566.767	74.4349	1983.66	399.46	0.996738	247.52	ok
STYSTUY	1216.95	170.814	3164.17	598.963	0.99822	394.62	ok
YUYYTUT	523.452	53.0934	1850.78	294.245	0.99783	230.72	ok
USYUUUS	498.825	164.379	1853.42	956.892	0.977799	231	ok
STYYTST	416.779	52.7774	1629.39	337.438	0.995934	203.02	ok
TYYUUUY	297.669	55.3885	1247.98	418.535	0.987453	155.4	ok
TTYSYUU	470.985	68.0367	1714.83	398.156	0.995247	213.48	ok
TUYSYYU	559.266	113.821	1906.45	602.414	0.991892	237.32	ok
YUYUYYS	575.884	136.705	2025.14	732.405	0.989643	251.92	ok
YUYYTYU	328.645	75.5421	1327.76	537.257	0.982549	165.16	ok
STYSTSU	881.378	273.517	2645.56	1158.38	0.988266	329.08	ok
TTYTSUY	1422.77	315.28	3486.07	1018.7	0.996256	433.6	ok
YUYYSTT	418.012	76.9874	1581.03	481.198	0.991233	196.64	ok
YUYTSST	1272.57	297.069	3273.32	1022.3	0.995383	407.1	ok
TUYYSUT	585.44	65.542	1991.51	341.445	0.997674	247.64	ok
TUYYTTY	567.478	137.689	1919.21	721.47	0.988658	238.6	ok
YTYUUTU	957.296	210.535	2756.97	846.275	0.99463	342.66	ok
UYYUUUY	282.129	42.7177	1269.61	344.194	0.991619	157.72	ok
STYTTUS	1769.26	872.207	3999.51	2524.51	0.985333	496.7	ok
UUYSYTU	374.095	39.4093	1514.44	267.665	0.996897	188.04	ok
SSYUSSY	512.452	90.2154	1877.61	515.718	0.993631	233.12	ok
UTSUTYU	170.248	25.0495	869.701	267.556	0.98759	107.92	ok
USYSSSS	471.53	131.014	1696.31	760.32	0.982163	210.4	ok
STYYTUU	526.633	69.5709	1870.47	385.995	0.996463	231.9	ok
TUYSTSY	921.615	484.881	2754.55	2023.19	0.968952	341.4	ok
UUYSYTS	456.651	40.6212	1716.23	245.314	0.998171	212.68	ok
YUYUUSS	902.645	130.543	2611.38	534.722	0.997473	323.46	ok
SUYTUYU	1533.95	110.593	3628.87	341.96	0.999628	449.28	ok
YUYUSSU	1352.8	391.21	3408.53	1306.48	0.993365	421.88	ok
TUYUSYY	1167.32	722.312	3178.89	2649.86	0.966366	393.24	ok
YUYUTSS	1014.76	249.26	2867.01	973.098	0.993634	354.56	ok
UUYUYTY	584.67	99.1542	2028.36	523.816	0.994819	250.84	ok
SUYYSTT	482.059	58.3934	1760.29	339.75	0.996731	217.6	ok
TTYSSUY	1017.73	89.3383	2845.17	345.776	0.999183	351.36	ok
TTYUSYS	1724.01	255.472	3897.79	743.496	0.998616	481.28	ok
TTYTYYY	494.77	139.144	1753.29	786.679	0.98271	216.48	ok
USYTTTS	465.65	49.6126	1739.83	296.507	0.997427	214.8	ok
TTYSUTY	674.688	162.799	2240.16	798.931	0.990994	276.4	ok
TTYTSYT	1524.22	317.415	3593.3	980.162	0.996894	443.32	ok
YTYUTUS	1556.66	578.774	3707.07	1793.17	0.990567	457.18	ok
YTYUTYS	836.664	67.9647	2527.42	293.273	0.99915	311.56	ok
TUYSYSS	654.877	102.725	2140.16	502.939	0.995919	263.72	ok
TTYYSSS	704.735	65.1411	2279.8	309.878	0.998699	280.8	ok
YTYUSUU	1121.22	150.647	3032.6	555.192	0.998285	373.4	ok
TSYSTUT	340.481	59.3586	1447.92	430.381	0.990935	178.08	ok
SUYTSUU	1296.02	151.559	3300.91	515.425	0.998868	405.92	ok
STYUTTY	2033.07	652.855	4328.61	1751.9	0.994535	532.08	ok
YTYSSYY	537.415	100.411	1947.66	561.191	0.993176	239.38	ok
YUYTTSS	1100.6	215.127	3021.96	805.529	0.9963	371.04	ok
YTYUUTY	1067.34	176.376	2943.8	667.718	0.997279	361.24	ok
TSYTTUT	482.195	103.069	1822.21	613.603	0.990366	223.48	ok
UUYUSYU	1868.1	853.349	4155.18	2411.6	0.988201	509.4	ok
UYYUUUU	302.343	30.855	1292.51	234.571	0.996373	158.28	ok
TTYSUYT	804.901	63.6014	2476.16	281.068	0.999165	303.2	ok
UUSUSUU	311.946	44.4809	1321.17	332.249	0.993332	161.72	ok
UUYTYSY	983.076	443.816	2722.26	1721.01	0.97766	333.16	ok
SUYUTYU	1518.33	249.114	3608.22	774.736	0.998074	441.44	ok
UYYTUUY	350.169	117.546	1425.09	820.347	0.966984	167.66	ok
STYSUSS	607.273	47.3864	2068.48	244.313	0.998927	252.84	ok
SUYSYSU	670.68	125.593	2178.35	607.909	0.994399	266.24	ok
TTYSUSS	706.873	148.995	2318.97	715.246	0.993401	283.4	ok
UYYUTUT	325.945	37.7715	1358.38	274.752	0.995635	166	ok
TSYUTYY	328.339	71.9757	1346.07	516.775	0.984471	164.48	ok
TTYSYUY	479.249	157.027	1723.04	905.957	0.976249	210.52	ok
SSYTTSU	364.086	120.468	1455.56	819.579	0.969018	171.4	ok
TTYTSSS	2016.47	236.694	4293.43	636.184	0.999264	524.4	ok
STYTUTT	1048.5	233.061	2937.04	896.622	0.995051	358.44	ok
UUSTUUT	256.52	45.9609	1140.14	381.457	0.987312	139.12	ok
UTYYUST	407.088	96.56	1571.56	617.308	0.985527	191.72	ok
YTYSUYT	714.667	160.1	2339.54	764.981	0.992661	285.32	ok
TYYTTST	261.812	19.6102	1177.87	162.633	0.997767	143.6	ok
UUSUTTU	249.756	36.3135	1130.6	307.992	0.99138	137.8	ok
UTYYUYS	334.683	31.0997	1421.44	226.717	0.997336	173.24	ok
STYYTSS	460.54	51.0098	1729.7	307.042	0.997154	210.64	ok
TSYUUTU	346.823	92.4842	1390.34	641.557	0.978382	169.16	ok
TUYYTSS	649.794	80.2731	2198.35	403.623	0.997532	267.28	ok
YUYYTTS	445.386	64.4653	1685.04	394.328	0.995007	204.8	ok
SUYSSUY	909.405	124.531	2702.54	519.226	0.997817	328.44	ok
STYUYTU	846.897	235.033	2609.9	1025.67	0.990673	317.16	ok
TUYTSYY	1263.57	516.484	3202.54	1760.35	0.985654	388.8	ok
YTYUTTS	1248.27	196.18	3267.64	687.336	0.997897	396.46	ok
UYYSUUS	208.976	32.1903	1047.51	311.819	0.988759	127.08	ok
TTYSYYU	540.358	120.178	1897.97	656.322	0.990227	230.24	ok
UTSUTUU	288.997	108.256	1293.2	861.299	0.954602	140.68	ok
TTYSTTU	974.21	87.3235	2804.43	349.308	0.999127	339.92	ok
USYSTTY	246.989	43.6562	1180.81	384.36	0.987587	143.08	ok
SUYYUTU	368.993	30.7673	1505.51	211.052	0.998061	182.32	ok
TUYUSST	2449.69	399.025	4782.11	963.592	0.998832	579.04	ok
TTYTTST	1556.91	722.554	3768.5	2267.36	0.985595	456.24	ok
UTYTYUS	624.059	105.103	2150.22	541.769	0.995339	260.32	ok
YUYUYST	776.901	246.71	2381.26	1098.2	0.986098	288.16	ok
TUYTTST	1804.02	712.507	4089.27	2058.62	0.990913	494.84	ok
TYYUTSS	266.698	28.9679	1230.05	242.15	0.995555	148.84	ok
UTYUSTU	1648.36	252.086	3810.52	753.71	0.998492	460.88	ok
USYUUYU	390.892	32.0548	1563.18	212.676	0.9982	189.04	ok
USYUUUY	516.057	25.1182	1884.28	142.93	0.999518	227.8	ok
YTYSTUS	826.621	187.848	2570.32	830.54	0.99347	310.72	ok
TTYTTYU	1167.45	296.92	3156.82	1083.39	0.994203	381.52	ok
SUYYUSS	422.102	78.9623	1627.05	498.016	0.991272	196.6	ok
SUYYYUY	307.71	76.9029	1301.03	576.797	0.978682	157.2	ok
STYYSUY	557.677	183.357	1922.36	978.74	0.979311	232.16	ok
SUYUSYS	1152.31	292.143	3134.68	1074.2	0.994112	378.56	ok
UUYTSSY	2115.68	613.442	4472.98	1624.36	0.995789	540.16	ok
SUYSTYY	814.357	183.471	2550.2	818.702	0.993476	307.92	ok
YTYSUTT	704.134	123.407	2277.04	587.043	0.995391	274.9	ok
YTYYUYY	382.572	90.7742	1516.52	603.405	0.984386	183.02	ok
UTYYSYT	636.707	382.255	2144.32	1927.53	0.944407	243.16	ok
TUYTUST	1381.83	726.683	3532.44	2442.46	0.9796	425.96	ok
YUYSTSY	747.108	112.892	2402.25	525.867	0.996776	289.64	ok
TTYSUUU	1043.5	368.356	2989.15	1442.85	0.987749	360.28	ok
STYTUSU	956.252	144.146	2795.39	586.032	0.997524	336.78	ok
TSYUSYT	491.023	38.4479	1825	225.008	0.998708	219.72	ok
YTYUYYT	822.329	132.676	2510.75	579.695	0.996631	302.22	ok
UUYSYUY	506.986	177.393	1806.02	998.41	0.974814	217.32	ok
STYYSSU	476.526	56.4651	1802.6	337.683	0.996973	216.78	ok
TYYTTSS	272.301	53.3481	1260.96	443.489	0.986051	151.64	ok
UUYUUYY	1284.76	515.638	3378.97	1801.06	0.987056	406.32	ok
USYSUYY	206.23	69.3191	1050.46	681.544	0.949902	110.08	ok
USYUTUU	560.149	38.7697	1995.52	211.384	0.999115	239.8	ok
TTYSTYU	668.879	102.224	2256.41	508.615	0.996408	271.12	ok
TUYTYYY	571.785	134.483	1979.59	714.368	0.989791	237.64	ok
UTYTSUS	1486.94	341.591	3655.54	1095.86	0.996317	438.8	ok
USYSUUT	290.617	16.496	1298.78	130.861	0.998868	155.84	ok
YTYTYTT	507.069	113.703	1885.86	658.842	0.990044	225.92	ok
USYTUSS	347.553	79.8304	1495.07	578.792	0.984958	179.04	ok
YTYYTTS	350.701	99.9999	1514.74	724.594	0.977263	181.36	ok
TUYTYUY	603.779	60.7811	2088.93	317.35	0.998256	250.08	ok
UUYTYSU	946.307	246.986	2727.79	996.454	0.992394	326.44	ok
YUYTUTY	1136.25	315.005	3057.08	1152.53	0.992847	365.84	ok
UUYUSYS	1699.12	862.096	3996.09	2596.48	0.98441	478.2	ok
UYYTUSU	204.014	29.4997	1018.18	287.867	0.989878	121.84	ok
YUYSSTY	838.935	77.9111	2575.77	339.941	0.998925	308.08	ok
UYYUSSY	467.521	130.864	1733.79	777.166	0.982408	207.36	ok
SUYSYSS	741.787	252.89	2330.84	1161.08	0.983487	278.64	ok
YSYUTST	358.801	60.513	1522.65	430.017	0.99217	181.86	ok
STYSTUS	1288.71	527.725	3406.59	1849.21	0.986687	406.52	ok
UUSUTUY	317.729	34.0595	1372.67	255.834	0.996399	163.72	ok
SUYTTYT	1272.47	84.6734	3328.72	295.186	0.999633	396.76	ok
UTYTYYT	926.619	81.5601	2736.44	336.829	0.99913	326.08	ok
SSYUTUS	626.711	58.7434	2154.31	301.922	0.998547	256.68	ok
YUYUUSU	994.383	132.91	2879.34	531.204	0.998137	342.98	ok
TTYTYUT	634.27	65.0196	2161.29	330.948	0.998293	257.4	ok
TUSUTUY	405.347	129.77	1568.89	832.261	0.974125	186.36	ok
YTYYUUS	433.212	149.219	1759.14	965.667	0.973575	209.28	ok
TTSTTUU	283.403	109.681	1295.76	890.953	0.952262	136.84	ok
SUYSSYT	740.856	79.0982	2381.24	369.224	0.998378	282.88	ok
TTYYSSU	673.438	147.176	2292.96	735.658	0.992775	272.32	ok
UUYUUYS	1447.51	286.973	3623.15	939.168	0.997173	430.24	ok
SSYSUUT	341.831	40.551	1432.18	290.824	0.995736	169.96	ok
TTYSTUT	1364.71	357.833	3509.62	1211.7	0.99482	416.36	ok
UTYTTST	2056.22	314.368	4382.5	842.458	0.998801	519.84	ok
SUYSUST	704.23	78.2843	2307.02	375.827	0.998153	273.64	ok
UUYUSSS	2599.07	1421.13	5107.37	3414.67	0.988191	605.76	ok
STYYTTU	626.632	236.257	2086.51	1187.6	0.976108	247.44	ok
TTYSYTT	400.077	43.5654	1607.66	287.626	0.997004	190.64	ok
TTYUTST	1806.5	535.757	4127.4	1557.33	0.99497	489.28	ok
YTYSSYU	561.451	68.9624	2037.06	380.509	0.997264	241.48	ok
UYYUTTU	275.079	33.5482	1229.62	271.836	0.994508	145.76	ok
UUYTSUY	1506.07	562.039	3728.27	1807.89	0.990557	441.84	ok
TTYYSUT	638.417	66.1453	2176.94	336.19	0.998266	257.88	ok
UYYSSST	287.82	31.3727	1274.21	248.339	0.995732	150.92	ok
USYUTUT	608.508	160.778	2157.25	851.881	0.988461	255.44	ok
TUYUSSU	2162.48	923.754	4578.57	2438.88	0.991303	542.12	ok
USYTUTY	343.183	35.9493	1442.49	257.981	0.996745	170.72	ok
UUYTSYT	1528.62	150.692	3716.84	476.426	0.999333	439.84	ok
UTYYSSS	782.944	111.858	2470.51	507.349	0.997285	292.2	ok
YTYSSTY	765.62	176.759	2483.93	823.076	0.992919	293.76	ok
SUYYTTU	549.698	108.694	2021.25	609.266	0.992837	239.04	ok
TSYTUYT	343.79	40.4267	1458.48	291.644	0.995965	172.48	ok
UTSTUUY	219.916	56.744	1066.82	527.99	0.971211	119	ok
SUYTTYS	1077.35	448.096	3087.4	1742.07	0.983803	364.92	ok
TUYTSTT	1752.68	537.914	4056.8	1589.56	0.994484	479.12	ok
USYSTUY	382.907	48.1221	1555.55	324.902	0.995786	183.52	ok
STYTSYS	1075.07	208.539	2990.32	793.096	0.996327	352.74	ok
UTYYUTS	344.859	41.2703	1447.69	295.404	0.995801	170.76	ok
TUYYUYU	398.049	36.81	1637.16	247.194	0.997828	193.04	ok
TUYUYYT	977.651	55.0378	2848.93	221.971	0.999663	335.92	ok
SUYTTST	1357.25	488.988	3523.4	1669.99	0.990248	415.44	ok
YUYYSSY	457.712	35.1664	1780.86	217.175	0.998678	209.96	ok
TUYTSTY	1922.26	206.995	4252.3	579.127	0.99937	501.24	ok
YTYYUYU	340.461	32.1342	1452.33	233.457	0.997348	171.08	ok
UUSUTUT	342.718	60.4116	1435.82	432.838	0.990917	169.12	ok
TYYTTUT	352.524	25.0756	1485.84	178.529	0.998559	174.96	ok
UUYYSSU	775.776	145.85	2507.99	674.956	0.995356	295.16	ok
UUYTTSS	2039.5	546.047	4428.72	1487.88	0.996355	521.2	ok
YUYUSYU	887.867	100.006	2699.68	426.752	0.998527	317.64	ok
YTYUTYT	1049.64	272.714	3017.41	1069.53	0.993484	354.94	ok
YUYTYUY	688.291	91.0246	2290.66	444.85	0.997398	269.22	ok
SUYUUSS	1151.42	114.891	3166.88	426.075	0.999104	372.16	ok
SUYSSYY	632.486	200.034	2136.66	1012.87	0.983563	251	ok
SSYTUUU	420.303	51.0382	1682.74	330.527	0.996473	197.6	ok
YUYSTYU	647.522	267.371	2283.47	1385.85	0.974311	268.14	ok
UYYUTUS	347.369	37.7014	1459.52	269.305	0.996538	171.36	ok
UTYTYTU	505.1	59.3023	1896.73	346.316	0.997253	222.68	ok
SUYUSYY	1161.04	346.617	3217.9	1290.42	0.992202	377.6	ok
SYYUUTT	197.164	52.8968	1006.65	530.565	0.965787	107.4	ok
TTYUSTU	1839.89	540.164	4186.6	1559.31	0.995242	491.08	ok
TUYUYTT	808.024	70.8201	2539.27	317.503	0.999027	297.66	ok
TSYTUUS	517.645	180.078	1966.54	1051.82	0.977251	230.48	ok
SUYYTUT	738.381	152.187	2439.29	725.235	0.994204	285.8	ok
UTSTSSU	287.742	57.7211	1291.88	460.946	0.986301	151.36	ok
STYUUTS	1192.74	512.946	3276.83	1884.88	0.98465	382.8	ok
TTSUUUS	259.204	25.9306	1200.96	219.791	0.996186	140.24	ok
YUYYTYT	354.51	33.5659	1519.9	241.131	0.997478	177.44	ok
TSYTUTU	330.722	40.2297	1434.5	298.52	0.995593	167.4	ok
TUYYTTS	653.891	199.5	2183.74	992.158	0.985354	254.72	ok
UTYSUSY	822.491	147.073	2561.2	651.836	0.996027	298.72	ok
YTYTYSU	588.106	280.624	2041.62	1480.49	0.961566	232.14	ok
TTYTYTY	573.031	75.054	2047.59	407.204	0.99701	238.6	ok
USYUTTS	494.319	80.278	1901.51	479.858	0.99477	221.52	ok
TUYYTYU	401.687	45.1169	1628.51	299.191	0.996814	189.64	ok
TTYYUSS	440.207	38.0314	1747.79	241.163	0.998307	203.52	ok
TUSUUUT	289.162	40.6363	1324.96	328.034	0.993401	154.24	ok
TSYTTSU	447.506	83.117	1723.55	513.658	0.992173	200.64	ok
STYTYTT	766.263	71.3458	2484.45	331.993	0.998859	289.14	ok
YTYTUSS	726.036	95.4872	2418.58	459.939	0.997599	281.46	ok
TUYYTYS	433.365	133.485	1670.94	834.521	0.97774	194.44	ok
STYSYYT	690.776	54.8674	2327.84	270.263	0.999069	270.82	ok
UUYYTYU	365.127	54.3541	1566.5	386.607	0.994103	182.24	ok
UTYSYTU	429.322	55.3305	1703.32	353.634	0.996174	198.08	ok
TTYYSYT	457.903	61.2049	1769.45	376.198	0.996032	205.52	ok
TTYSTUS	1179.69	209.213	3248.97	772.219	0.997284	377.28	ok
TUSUTUU	361.044	61.1564	1496.01	427.003	0.992126	173.68	ok
SSYUTUT	660.053	168.252	2296.46	858.993	0.990245	266.6	ok
SYYUUYY	341.697	90.0924	1429.12	645.505	0.979057	165.88	ok
TYYUUST	231.204	18.1743	1127.28	166.219	0.997394	130.84	ok
UUYSUYY	713.632	287.569	2428.41	1413.35	0.977773	281.84	ok
SUSUTUY	415.742	42.5044	1669.79	276.865	0.997502	193.76	ok
TTYSUSY	797.937	135.44	2564.61	619.351	0.996387	297.44	ok
UYYTUUT	335.12	30.0924	1468.95	223.728	0.997651	170.28	ok
SUYYUUU	547.201	49.2616	2024.6	277.703	0.99852	234.68	ok
UUYUYUU	764.507	83.1187	2468.5	385.862	0.998435	286.04	ok
UUYSSSS	1700.63	580.133	3952.55	1730.58	0.992893	458	ok
TTYYUSU	403.062	109.217	1692.79	740.466	0.982711	196.08	ok
UUYYUSS	546.868	36.1224	2003.69	202.302	0.999194	231.88	ok
USYTUSU	386.458	124.12	1553.42	829.568	0.973231	177.56	ok
STYUTUU	2222.04	529.152	4695.32	1387.8	0.9974	543.28	ok
SUYUYYS	848.377	47.9696	2639.29	210.693	0.999614	305.36	ok
TSYUUYU	432.682	70.5632	1696.78	446.348	0.993798	196.28	ok
SUYYUSY	561.623	41.7555	2059.92	232.111	0.999007	238.24	ok
STYYUYS	558.177	171.293	1982.55	933.039	0.982566	229.28	ok
YUYYYUS	235.605	26.5268	1167.97	243.218	0.994793	135.04	ok
TTYUUYY	1499.85	339.608	3749.31	1101.79	0.996526	433.32	ok
STYYYSU	355.606	56.4059	1501.01	400.718	0.99295	173.4	ok
STYTUTU	1108.7	107.658	3115.62	409.523	0.999142	359.84	ok
TTYTSTY	1836.35	259.248	4170.06	747.451	0.998888	481.44	ok
TUYSSUY	1115.74	256.406	3160.93	979.888	0.995277	364.88	ok
STYUYYY	802.052	98.7962	2576.91	451.035	0.99811	297.44	ok
UTYYUUU	581.703	45.3111	2085.26	245.256	0.998945	240.68	ok
YUYSUUU	916.335	409.581	2841.82	1759.12	0.978878	327.9	ok
TUSTTUY	293.73	33.6065	1325.12	267.089	0.995723	152.88	ok
TUYYUST	464.792	81.9374	1850.08	511.278	0.993463	213.44	ok
STYSUYS	866.166	95.214	2671.64	413.293	0.998567	308.2	ok
UTYSTSU	1219.2	175.955	3280.11	633.023	0.998239	378.28	ok
TUYSTUU	1409.91	678.366	3659.77	2297.25	0.983721	421.96	ok
STYTYST	919.201	138.827	2762.54	582.03	0.997493	318.46	ok
UTYTUSS	1398.88	414.868	3622.64	1404.77	0.993716	417.48	ok
TTYYSYU	455.392	138.449	1741.26	846.541	0.9795	200.6	ok
STYSTTU	1087.91	68.9976	3082.9	265.346	0.999624	355.16	ok
TTYTYTS	627.124	79.6274	2207.59	416.08	0.997451	254.28	ok
UUSUTTT	344.34	88.7193	1439.72	633.752	0.981152	165.8	ok
YTYTTUT	1550.73	252.582	3784.61	798.429	0.998233	435.78	ok
USYTSSS	694.851	124.96	2350.11	616.092	0.995328	270.6	ok
SUYUYYT	1026.37	152.377	2972.06	604.211	0.997817	342.08	ok
YTYYTUY	470.779	178.649	1891.84	1117.37	0.971079	217.72	ok
UYYUUYS	260.961	28.0401	1214.26	237.662	0.995597	139.68	ok
SUSUTUU	398.277	49.8488	1653.5	336.759	0.996225	190.16	ok
UTYYUUY	648.669	306.816	2170.14	1531.41	0.965359	247.84	ok
TUYSUTY	751.396	64.6154	2461.26	304.551	0.999009	282.84	ok
UYYUTSY	267.846	31.4881	1237.32	263.038	0.994794	142.16	ok
SYYUSSY	354.977	155.297	1536.13	1121.83	0.95031	161.34	ok
TTYYUSY	505.236	238.145	1891.74	1387.86	0.957657	207.96	ok
UUYYUYS	469.181	12.4777	1839.15	76.8224	0.999849	210.84	ok
TSYTTTU	450.951	45.2925	1786.45	284.502	0.997811	204.76	ok
UYYTTUU	294.792	42.0144	1363.96	338.782	0.993417	156.28	ok
TUYYTST	625.694	46.5608	2204.47	243.608	0.999114	252.56	ok
TUYUSYT	2161.81	972.202	4548.08	2553.66	0.990415	521.04	ok
SYYUTTT	268.881	27.7417	1250.61	232.37	0.996119	143.24	ok
TYYUUUT	260.27	24.3065	1219.97	207.156	0.996717	139.72	ok
TUYYSTT	628.119	119.91	2177.36	619.531	0.994182	249.24	ok
YTYYTUT	500.191	100.51	1949.33	603.905	0.992163	223.06	ok
YTYTUSY	1127.26	252.396	3200.23	963.742	0.995584	366.18	ok
UTYSSYT	1007.4	142.084	2971.06	573.859	0.998031	339.92	ok
TYYUTTS	255.674	40.1592	1206.52	346.064	0.990464	138	ok
YUYSSUS	711.049	77.4985	2377.92	376.546	0.99833	271.96	ok
YUYUUST	1305.99	156.212	3470.13	547.918	0.998896	396.64	ok
UUYUTSU	2237.63	499.879	4750.06	1314.29	0.99776	542.84	ok
TUSTUUU	239.351	45.0302	1137.51	399.986	0.985653	129.92	ok
TYYTSSY	340.172	58.9136	1522.43	441.536	0.991643	173.88	ok
SSYUUTY	364.255	27.7567	1556.36	197.066	0.998437	177.74	ok
UTYSUYY	742.382	80.313	2470.31	384.151	0.998431	281.84	ok
YSYTTTS	371.37	52.1786	1551.03	362.551	0.994696	176.94	ok
YUYYUSY	520.801	36.635	1979.28	213.631	0.999057	225.76	ok
SUYTYTS	847.043	66.148	2658.42	292.541	0.999275	303.16	ok
YTYYUUT	515.538	38.4772	1968.39	225.807	0.998936	224.46	ok
YUYYUUT	557.6	46.3463	2061.37	259.615	0.998774	234.78	ok
TUSUUUU	274.597	37.469	1270.35	310.295	0.993502	144.54	ok
UUYTSUT	1570.3	217.304	3837.44	685.808	0.998772	436.4	ok
USYYTUY	162.03	39.615	929.293	461.66	0.967596	105.68	ok
UTYSUTS	873.277	101.921	2708.02	443.196	0.99844	307.92	ok
UUYYTTY	667.378	60.674	2299.33	306.638	0.998763	261.04	ok
UTYTYST	1126.6	131.121	3160.76	496.247	0.998798	358.4	ok
SUYSTTT	1350.49	125.803	3532.85	432.695	0.99935	400.56	ok
TUSTUUS	253.508	32.1599	1212.16	280.298	0.994043	137.4	ok
TYYTTTY	277.335	27.1301	1287.03	224.26	0.996639	145.8	ok
UTYSUYS	715.424	222.083	2469.7	1102.09	0.987126	279.72	ok
UUSUUSY	249.242	42.933	1203.36	378.911	0.988878	136.28	ok
SUYYUUS	633.297	233.738	2297.9	1244.3	0.979596	260.16	ok
SUYYTTS	631.14	104.193	2211.23	541.605	0.995712	250.28	ok
USYTUUU	431.575	31.3478	1752.17	203.097	0.998814	198.16	ok
USYUUTS	373.742	117.045	1540.05	804.382	0.974397	173.08	ok
UTYYTYY	355.221	116.754	1503.82	831.338	0.970399	165.8	ok
SYYUTUT	331.547	35.9008	1487.43	271.961	0.996652	167.96	ok
YTYTYUY	659.343	168.13	2256.05	848.534	0.990214	254.64	ok
YTYTTUU	1435.1	444.753	3716.34	1497.6	0.993461	419.38	ok
TUYYSYT	449.117	150.984	1860.78	978.819	0.976649	209.96	ok
UUYSYSU	740.506	146.982	2494.18	709.747	0.994822	281.36	ok
UUYSTYS	918.401	125.215	2845.15	537.049	0.998	320.88	ok
YSYUUUU	411.547	77.5531	1663.04	508.953	0.991499	187.54	ok
YTYYTSY	468.523	91.7557	1823.42	562.442	0.991927	205.58	ok
UTYYTYS	347.851	46.5283	1500.13	337.788	0.994933	169.04	ok
STYSUUU	922.685	111.51	2851.7	476.861	0.998441	321.28	ok
YTYYUUU	424.742	57.0278	1762.43	376.885	0.995942	198.54	ok
TUYUSTU	1968.49	297.438	4406.6	836.308	0.998849	496.32	ok
SUYUYYU	911.99	297.223	2862.48	1289.58	0.988748	322.4	ok
UUYYTST	548.332	134.626	2095.09	775.57	0.989528	235.88	ok
YTYYUSU	329.857	40.3956	1464.87	304.58	0.995605	164.92	ok
UTYSTUT	1361.74	621.124	3641.09	2169.11	0.985232	409.92	ok
TUUUTUS	151.648	98.685	1009.92	1289.4	0.835715	73.04	ok
UUYSYUU	504.299	153.211	1891.13	894.343	0.982002	212.64	ok
YYYUUUT	264.06	23.953	1273.92	206.637	0.997083	143.22	ok
TYYSTUS	274.845	42.9258	1272.4	355.519	0.991323	143.04	ok
USYUUST	361.245	96.2239	1610.6	704.42	0.982064	180.92	ok
UTYUTTS	1547.16	801.176	3933.57	2617.04	0.983408	441.76	ok
UYYUUYY	229.11	17.1775	1138.41	159.477	0.997637	127.8	ok
UTYUYUY	842.324	174.054	2653.96	773.114	0.994992	297.92	ok
USYUUSY	379.177	52.7351	1640.33	372.237	0.995187	184.12	ok
YTYYYUU	337.784	207.532	1580.75	1605.07	0.911846	146.92	ok
UUYUYYY	850.902	122.439	2680.51	542.322	0.9976	300.8	ok
YTYUSUT	1113.85	239.902	3210.84	929.409	0.995962	360.26	ok
UUYTYYY	693.68	210.609	2328.88	1033.4	0.9869	261.16	ok
UTYYUSU	438.057	65.8624	1759.27	421.535	0.99497	197.16	ok
SUYTUYS	1364.53	942.676	3678.96	3312.03	0.967145	412.24	ok
YUYSSYT	641.654	34.729	2277.47	181.316	0.999551	255.18	ok
UUSUSUS	340.729	166.125	1539.17	1251.85	0.941379	152.6	ok
UTYTYUT	740.587	108.889	2471.09	522.219	0.997182	276.64	ok
STYUUUS	1875.64	505.646	4358.4	1478.91	0.996189	487.86	ok
SSYTTSY	406.534	41.3056	1714.62	280.023	0.99757	191.84	ok
SUYUYTU	1037.59	197.876	3066.19	794.605	0.996604	343.04	ok
TTYTTSS	1701.64	1236.5	4191.16	3862.83	0.970825	468.88	ok
YTYYTTT	475.6	102.932	1843.19	626.107	0.990265	206.04	ok
SUYYTSU	493.156	81.5368	1955.24	497.926	0.994718	218.56	ok
YUYYYYU	276.692	20.2103	1313.5	169.579	0.998129	146.78	ok
UTYYUYU	372.625	28.2682	1610.84	200.64	0.998516	179.96	ok
YUYSUUS	988.027	165.888	2952.48	679.927	0.997171	329.62	ok
SUYSUYY	1116.7	254.503	3229.47	987.815	0.995431	360.4	ok
USYUUTT	357.976	24.8224	1568.04	180.198	0.998713	174.88	ok
YTYUYSS	628.67	82.9895	2226.27	435.161	0.997282	248.2	ok
STYTYYS	736.119	122.372	2497.51	595.005	0.996349	278.44	ok
STYSTYY	828.87	62.2589	2683.04	283.292	0.999332	298.98	ok
SSYUUUT	559.412	59.9063	2096.31	338.42	0.99803	233.58	ok
STYUTYS	1161.57	313.717	3316.37	1194.67	0.993923	369.12	ok
SUYTYYU	770.33	229.085	2503.93	1066.39	0.988599	278.68	ok
UUSTTUY	315.798	32.9269	1424.78	254.772	0.996765	158.56	ok
TTYYUUY	539.5	34.816	2049.07	200.734	0.999256	227.92	ok
STYYTTT	588.759	49.3591	2163.71	270.869	0.998843	240.66	ok
TYYTTTS	259.823	20.6697	1250.44	179.155	0.997672	139.08	ok
STYSSSU	927.54	132.086	2883.01	566.497	0.997865	320.56	ok
YUYUYUU	688.063	100.536	2399.61	508.098	0.997051	266.76	ok
UUYSYYY	473.953	72.0453	1855.29	441.705	0.995237	206.24	ok
YTYUSYU	920.518	230.146	2883.69	994.762	0.993479	320.56	ok
UTYYUTU	359.572	77.6718	1530.39	552.575	0.987565	170.12	ok
SSYUUUU	569.859	28.8058	2121.43	161.079	0.999564	235.82	ok
STYYUYU	532.599	97.9295	2065.45	575.106	0.993954	229.56	ok
UTYSUTU	664.472	87.854	2310.9	447.54	0.997455	256.76	ok
TUYUYTS	763.113	104.032	2558.2	496.528	0.99767	284.12	ok
STYSYTT	697.428	58.4227	2398.37	291.188	0.999024	266.36	ok
TTYYUTS	343.971	78.1626	1572.01	591.493	0.986414	174.48	ok
UTSTUUU	234.845	52.3628	1123.45	470.521	0.97988	124.44	ok
UUYSSUT	1027.25	110.414	3036.69	444.594	0.998904	336.76	ok
STSTSYY	164.34	78.1692	1010.09	942.555	0.901539	84.22	ok
TSYUUYT	425.097	48.7745	1774.82	323.587	0.997074	196.6	ok
UUYYYYU	317.698	85.9359	1507.91	685.372	0.979271	166.96	ok
YTYUUYU	1194.24	471.517	3393.13	1777.52	0.987627	375.6	ok
YTYYTYU	317.202	57.6562	1472.58	453.589	0.99039	162.82	ok
TUYTYTT	585.517	62.9772	2180.42	349.399	0.998119	241.08	ok
UUYYTSU	582.685	46.6206	2164.43	258.568	0.998946	239.04	ok
SUYTSSS	1709.03	217.742	4138.88	670.512	0.999073	457	ok
UUSSUUU	224.885	52.7424	1102.95	489.504	0.977088	119.4	ok
TSYTUTY	353.823	97.4972	1504.04	697.028	0.979194	166	ok
UUYTYTT	554.325	67.2036	2085.23	381.716	0.99748	230.08	ok
TUYTYSS	967.352	151.441	2936.96	631.48	0.997545	323.84	ok
UTYSYYT	788.249	258.718	2662.86	1231.04	0.987149	293.56	ok
STYUSYU	1020.63	195.627	3076.02	800.564	0.996552	338.98	ok
YTYUSYY	1028	108.775	3046.78	438.769	0.998927	335.72	ok
USYTTYT	370.7	84.588	1574.05	594.468	0.986543	173.4	ok
TSYTYYY	170.927	51.3507	974.087	582.88	0.955417	93.84	ok
YUYUUTT	1084.37	194.366	3180	767.798	0.997164	350.1	ok
YUYSUTS	868.29	261.179	2708.15	1142.29	0.989801	298.14	ok
YTYTYST	678.13	156.869	2348.04	791.98	0.992378	258.48	ok
UTYTYSU	1053.56	504.885	3026.95	1977.4	0.978751	333.16	ok
YUYUSTU	1173.63	150.707	3300.87	565.973	0.998636	363.28	ok
STYSTSS	851.096	80.0306	2748.49	361.012	0.998995	302.46	ok
UYYTUUU	268.502	75.6852	1346.18	664.546	0.974141	148.12	ok
TUYYTTT	615.634	62.8546	2258.1	339.96	0.998383	248.4	ok
STYUYUT	1111.31	382.649	3171.24	1471.83	0.989682	348.78	ok
YUYUTTT	1640.61	871.915	4108.63	2780.58	0.983716	451.74	ok
TYYTSTY	371.036	41.7638	1629.76	299.987	0.996851	179.16	ok
SUYTYSS	877.3	166.201	2815.03	740.344	0.996106	309.4	ok
YTYSSTT	873.984	187.706	2815.5	839.414	0.995001	309.14	ok
YYYUTTU	210.444	20.4317	1083.74	200.529	0.995769	118.98	ok
YTYUUUS	1371.81	467.692	3687.65	1637.51	0.991992	404.84	ok
YTYTTSS	970.828	239.491	3004.63	1012.24	0.994037	329.82	ok
UUYTSSU	2517.89	576.309	5196.31	1449.99	0.997988	570.24	ok
TTSUUUT	259.887	70.4486	1243.8	608.463	0.974284	132.84	ok
TUSUTTS	338.833	48.9153	1508.61	365.894	0.994291	165.28	ok
YUYUSSS	1409.75	297.241	3743.06	1024.63	0.996958	409.92	ok
TTYYSTU	755.298	278.909	2480.34	1315.11	0.982579	271.52	ok
STSSUUS	177.605	62.7994	1012.81	701.772	0.942795	97.18	ok
YUYTUYS	663.689	120.909	2380.98	629.968	0.995271	260.52	ok
UUYUSST	2736.39	1601.96	5493.25	3884.44	0.988087	601	ok
UTYYTTU	526.208	99.951	2066.65	594.345	0.99365	226.08	ok
TUYSSTU	1206.59	137.694	3383.89	512.683	0.998961	369.84	ok
TYYSUUU	217.602	37.2464	1088.44	354.444	0.98702	118.92	ok
YTYYSTT	466.72	151.052	1822.37	929.126	0.978492	199.08	ok
YUYUYUY	801.092	279.64	2585.01	1281.11	0.985377	282.3	ok
YUYSTYT	737.857	154.24	2554.66	760.592	0.994426	278.96	ok
SUYTTSS	1315.44	488.886	3620.1	1759.43	0.990049	395.28	ok
SUSTTUT	399.815	96.6545	1738.92	672.533	0.986791	189.84	ok
SUYYSUU	572.962	95.0531	2130.08	530.152	0.995388	232.52	ok
SUYYTSY	612.067	64.7337	2261.91	352.585	0.998253	246.76	ok
SUYSSUU	955.676	202.88	2971.73	863.905	0.99556	324.16	ok
YUYYTTT	472.869	75.4889	1930.52	476.6	0.995009	210.58	ok
UTYTTYS	1333.78	756.119	3686.92	2722.43	0.977721	401.96	ok
UTYYTSS	578.998	155.681	2214.49	883.04	0.988501	241.4	ok
TUYYUYT	486.691	125.632	1890.41	759.693	0.986809	206.04	ok
TUYSYTT	479.849	134.398	1868.42	817.764	0.984405	203.52	ok
STYTYTS	979.727	530.297	2895.26	2160.04	0.971253	315.36	ok
YUYTSYT	852.128	370.962	2820.23	1703.6	0.979545	307.18	ok
TTYYSUU	537.241	107.551	2091.18	631.566	0.993123	227.68	ok
STYSUTU	832.642	242.35	2658.36	1090.33	0.990238	289.34	ok
TSYUUSU	399.85	48.3167	1717.5	333.4	0.996596	186.88	ok
SSYTYUT	333.566	207.985	1601.93	1643.13	0.9108	143.06	ok
TSYTUUU	425.98	103.991	1826.25	701.838	0.987355	198.68	ok
TTYUYUY	754.89	123.087	2557.35	593.729	0.99669	278.12	ok
STYSSUS	1096.62	134.488	3220.44	530.418	0.998694	349.82	ok
TUYUYTU	759.635	123.671	2556.04	592.598	0.996697	277.52	ok
YUYUYSY	771.405	212.118	2636.56	1023.86	0.990873	286.2	ok
UYYSTTU	191.122	17.3092	1039.59	182.518	0.996062	112.84	ok
YTYTUTS	936.841	91.1077	2914.94	390.067	0.999041	316.24	ok
UUSUTSS	404.977	55.66	1714.19	378.724	0.995685	185.96	ok
USYUSST	807.219	48.5579	2670.47	226.093	0.999571	289.68	ok
UTYSYUU	385.524	46.0816	1676.97	324.612	0.996611	181.88	ok
TYYSUSY	166.192	35.8961	972.777	418.734	0.975565	105.48	ok
YUYSTTY	957.089	160.013	2992.5	683.935	0.997214	324.48	ok
YUYYYTT	235.101	20.0288	1206.31	187.68	0.997187	130.78	ok
STYTTSY	1378.24	514.295	3737.23	1811.16	0.990514	405.14	ok
TUYYTTU	681.922	87.9801	2428.74	452.558	0.997712	263.28	ok
UTYYSUU	581.436	82.2911	2158.45	456.498	0.996765	233.96	ok
TYYUUUS	299.171	55.295	1448.77	456.45	0.989758	157	ok
TYYUUSU	250.262	13.9913	1243.97	125.502	0.998838	134.8	ok
USYUUSU	396.807	68.745	1727.2	479.796	0.993088	187.12	ok
TYYYUUU	91.1308	11.3455	617.246	187.703	0.984725	66.8	ok
SUYUYUU	1099.26	125.645	3205.01	492.543	0.998863	346.76	ok
UUYTYTY	521.224	71.2332	2053.47	425.734	0.996687	222.16	ok
YUYSYYY	468.975	68.4492	1935.95	436.58	0.995765	209.28	ok
UUYUSUY	1835.57	1153.92	4428.54	3493.43	0.980223	478.68	ok
SUYTSUY	1329.65	553.419	3658.91	1986.88	0.987863	395.44	ok
STYTUYS	1546.92	270.32	3971.66	889.918	0.998117	429.24	ok
UUSUUUS	345.059	49.5208	1533.04	367.531	0.994528	165.64	ok
SUYYTYU	409.547	66.8537	1780.7	461.39	0.993997	192.36	ok
TYYSUUT	231.966	23.3531	1180.79	218.921	0.995935	127.52	ok
YTYYUST	406.058	162.373	1698.84	1095.32	0.964221	176.3	ok
UTYUYYS	1203.66	150.735	3423.13	567.633	0.998761	369.52	ok
YUYSTYS	568.819	52.5186	2144.57	296.458	0.998574	231.5	ok
YTYYSSY	416.676	61.636	1750.54	413.349	0.995001	188.9	ok
USYSUTU	217.143	46.8587	1093.59	448.119	0.980289	116.52	ok
UUYTYSS	1196.48	325.677	3428.98	1235.41	0.994243	369.84	ok
STYYTYT	398.094	59.5117	1745.76	416.971	0.994852	188.24	ok
USYUTSU	551.531	52.4586	2108.7	301.819	0.998469	227.32	ok
TYYTUSY	226.128	12.8602	1169.39	122.944	0.998677	126	ok
TUYUYSS	937.203	271.962	2972.35	1181.08	0.991782	320.24	ok
TUYTUYT	1567.32	224.389	4001.2	733.401	0.998755	430.92	ok
TUYTTYY	1289.46	182.27	3574.53	662.601	0.99853	384.96	ok
TUYSSUU	1208.74	392.62	3452.12	1481.95	0.991899	371.56	ok
STYTYYY	631.016	137.918	2272.15	730.98	0.992752	244.5	ok
UUSTTUU	310.133	78.917	1406.06	616.576	0.98099	151.28	ok
YTYUYYY	737.16	40.9142	2539.51	201.076	0.999603	273.14	ok
UTYSYSS	849.6	171.723	2736.92	773.575	0.995428	294.32	ok
STYUTSU	1533.88	281.753	3960.11	933.276	0.997919	425.64	ok
SSYTUYY	491.6	71.2655	1998.08	443.134	0.99606	214.66	ok
YTYTTTT	1343.22	224.425	3657.56	797.359	0.99803	392.84	ok
STYSYSS	737.033	332.809	2474.35	1605.34	0.97398	265.74	ok
TUYYSST	849.592	106.058	2790.03	484.622	0.998276	299.56	ok
YSYUUYY	455.407	130.575	1833.48	826.507	0.982971	196.8	ok
YTYYSST	442.64	95.0647	1883.65	630.524	0.990527	202.18	ok
SYYTUSS	205.942	63.0504	1109.98	641.417	0.961594	108.08	ok
TTYYUTY	410.819	82.1815	1721	552.685	0.990781	184.64	ok
TSYUTST	587.515	76.279	2189.84	423.04	0.997326	234.84	ok
TUSTTSU	309.997	64.7394	1412.5	507.499	0.987117	151.36	ok
STYTSTS	1752.84	240.611	4248.45	737.707	0.998978	455.24	ok
UTYSUST	938.695	177.089	2979.5	769.23	0.996463	319.16	ok
TYYTTTU	257.47	25.4175	1268.33	224.274	0.996538	135.8	ok
UTSUUUT	257.527	33.4586	1268.05	295.119	0.994102	135.72	ok
UUYYYYT	407.169	23.258	1755.9	159.944	0.99926	187.84	ok
SUYTYYS	687.303	52.6459	2445.88	270.049	0.999194	261.6	ok
SYYUTYY	195.933	48.2256	1052.85	499.75	0.972276	108.26	ok
STYSTUU	1279.54	294.784	3578.07	1080.76	0.996128	382.58	ok
YUYYTTY	487.402	75.5774	1991.06	472.845	0.995472	212.72	ok
YSYUUUY	455.482	94.0902	1919.78	614.368	0.991604	205.08	ok
YTYUUUT	1518.88	602.592	3981.21	2024.26	0.990401	425.24	ok
YUYSTTU	1005.01	353.903	3138.01	1493.22	0.988718	335.08	ok
TTSUUSS	205.817	62.7617	1108.79	638.461	0.962668	108.12	ok
YTYTYYT	726.542	38.1818	2532.26	189.994	0.999644	270.16	ok
TTYUSTY	2298.87	452.22	4995.28	1206.17	0.99842	532.88	ok
YTYSTYT	612.303	298.606	2357.56	1674.47	0.966027	251.46	ok
TSYUUTT	338.564	53.5528	1525.47	403.788	0.993224	162.68	ok
YUYYTTU	466.769	116.068	1872.64	727.135	0.987653	199.64	ok
UTYSSYU	933.214	245.765	2980.01	1073.95	0.993142	317.48	ok
TUYSYUS	629.55	303.652	2232.19	1592.98	0.965744	237.76	ok
USYUTTY	498.707	74.2294	2020.55	458.512	0.995951	215.2	ok
STYTSST	1645.53	1051.18	4213.79	3410.55	0.977513	448.62	ok
UUYYYSU	376.437	69.8002	1644.66	497.141	0.991634	175.08	ok
UUUUUUY	92.7742	16.9177	594.467	269.503	0.969311	63.28	ok
TUYYSTY	682.146	60.4887	2448.33	312.851	0.998933	260.52	ok
TTYYTYY	328.135	29.9577	1523.82	232.896	0.997659	162.08	ok
SUYTYYY	669.454	109.513	2441.51	575.985	0.996305	259.56	ok
STYTSTU	1595.39	210.849	4035.88	681.685	0.998968	428.98	ok
SYYTTTY	238.743	70.2105	1281.56	672.401	0.969178	136.18	ok
SUYTYST	1016.3	94.2952	3105.7	390.36	0.999211	329.88	ok
TYYUSTT	406.428	34.7176	1762.81	239.815	0.998367	187.2	ok
SUYYUTT	427.494	60.8515	1791.79	404.017	0.995605	190.2	ok
SSYUSTU	474.029	63.2791	1961.2	402.864	0.996594	208.18	ok
UYYUUYU	256.668	54.9383	1250.32	482.001	0.983578	132.72	ok
TSYUTTS	493.825	67.1744	2010.05	417.531	0.996621	213.16	ok
UUSUUSS	283.336	40.6514	1361.59	340.671	0.993467	144.32	ok
YTYUYYU	753.082	45.9837	2603.1	225.239	0.999537	275.9	ok
UUYUYTT	764.317	88.4343	2606.45	427.205	0.998374	276.2	ok
TUSTTUT	343.257	108.245	1525.39	804.976	0.973872	161.64	ok
UUYYTYY	329.694	46.9682	1511.54	361.519	0.994316	160.12	ok
STSUUUT	259.799	33.1996	1281.6	292.188	0.99434	135.76	ok
UUYUYSY	1335.28	143.087	3667.73	512.513	0.999201	388.52	ok
TSYTSTU	490.397	61.2474	1996.08	381.511	0.997136	211.44	ok
STYYUUT	555.257	94.1117	2180.66	550.631	0.995288	230.96	ok
SUYSTST	1050.79	430.031	3230.41	1774.19	0.985468	342.08	ok
SSYTTTU	481.643	37.1567	1955.05	232.316	0.998862	207	ok
TUSTTSS	302.117	92.0158	1414.25	740.718	0.972462	149.68	ok
TSYUTYT	388.13	25.9919	1716.91	184.726	0.998953	181.44	ok
YTYTTSU	1021.77	367.79	3189.29	1545.31	0.988545	336.98	ok
SUYYTSS	532.128	109.523	2121.6	655.901	0.992749	224	ok
UUYSYSS	866.62	46.7796	2830.93	211.834	0.999686	298.88	ok
STYUUSU	1225.15	114.32	3486.77	429.029	0.999338	368.06	ok
YTYSUUU	812.283	92.5797	2746.3	437.316	0.998527	289.48	ok
TUYTSYU	1479.07	469.403	3942.05	1606.63	0.993763	415.28	ok
YUYUUUT	2050	682.751	4738.19	1955.39	0.995001	499.1	ok
SUYUTTU	2124.46	795.237	4856.03	2242.41	0.993871	511.4	ok
UTYUYUT	935.014	167.179	2989.99	730.973	0.996878	314.84	ok
UTYUSUY	1774.66	551.179	4369.94	1707.46	0.995027	460.12	ok
SUYSUTU	790.702	92.5182	2676.22	440.474	0.998402	281.76	ok
STYSYUY	663.562	73.4477	2418.45	387.073	0.998314	254.58	ok
YUYUSYY	1087.76	363.666	3308.67	1476.21	0.990604	348.08	ok
USYTTUT	623.641	193.805	2363.65	1069	0.986245	248.6	ok
TTSUTST	332.175	114.806	1506.26	875.102	0.968501	152.64	ok
TTYUYYS	1032.28	178.843	3172.64	740.815	0.997336	333.44	ok
SSYUTYY	384.146	40.5364	1700.15	289.192	0.99735	178.68	ok
UYYSSSS	327.561	23.3147	1533.75	182.334	0.9986	161.16	ok
SYYUTUS	388.316	46.2646	1696.36	326.031	0.996611	178.2	ok
UYYUUYT	234.795	20.2621	1207.89	190.265	0.997106	126.84	ok
TTYYTYU	310.133	21.8103	1475.79	175.74	0.998571	154.96	ok
UUYYSUT	616.249	105.627	2299.05	578.066	0.995674	241.4	ok
TUSTUUT	278.11	25.5066	1360.3	217.642	0.997305	142.8	ok
USYTSYU	403.296	61.4361	1732.03	422.668	0.994713	181.8	ok
STYSSTS	1075.85	288.953	3274.45	1176.5	0.993898	343.62	ok
UTYYUYT	407.872	74.7897	1808.79	523.763	0.992744	189.76	ok
YUYSSUU	842.134	107.241	2789.09	494.246	0.998234	292.58	ok
UUYYSYT	498.882	90.8566	1987.35	554.646	0.993887	208.32	ok
TSYSTUU	389.112	76.2845	1690	535.148	0.991039	177.12	ok
STSUUYY	429.14	107.259	1873.86	731.187	0.987486	196.38	ok
TTYUYUU	761.99	61.9926	2628.35	302.232	0.999209	275.4	ok
UYYUUTU	242.656	89.053	1270.94	834.792	0.954535	119.92	ok
TYYUTSU	303.173	59.3512	1486.39	491.462	0.988957	155.68	ok
UUSSTUY	240.661	46.8955	1272.38	443.559	0.98653	133.12	ok
UUSUTYY	281.966	166.607	1478.2	1478.11	0.910921	125.4	ok
YUYTTSU	1368.73	342.523	3702.5	1205.75	0.995737	387.24	ok
SUYSSTY	1063.63	268.341	3264.63	1102.59	0.994586	341.24	ok
UTYTSSY	2341.54	973.616	5146.3	2613.07	0.993265	537.8	ok
UYYTUTT	214.191	54.1786	1133.77	536.713	0.973792	113.32	ok
TUYTYUT	651.44	58.0611	2391.73	309.2	0.998895	249.92	ok
YSYUSTU	405.762	92.5156	1726.02	631.159	0.988371	180.22	ok
YUYTSYU	877.49	67.616	2878.96	306.212	0.999377	300.46	ok
TTYSYSU	654.573	57.6532	2395.52	305.906	0.998919	249.96	ok
YSYTTUY	472.314	88.2876	1969.77	565.812	0.993391	205.5	ok
YUYTTTS	1296.49	440.515	3681.52	1629.84	0.99194	384.08	ok
USYSUST	236.793	18.7703	1238.97	177.507	0.997651	129.24	ok
TYYTUTT	183.297	24.695	1033.69	270.605	0.991476	107.8	ok
SUYSUSY	795.129	235.61	2759.77	1141.08	0.990086	287.64	ok
TTYSTYS	887.669	215.959	2872.25	965.115	0.993854	298.92	ok
SSYSSUY	344.895	69.1509	1554.7	518.154	0.989297	161.76	ok
TTYUUST	1591.87	508.138	4150.9	1683.81	0.994176	431.6	ok
TTYUYSY	1074.63	326.504	3207.72	1310.11	0.992116	333.36	ok
SUYTTTU	1920.22	227.209	4583.74	676.173	0.999327	476.36	ok
SUYUSSY	2174.95	770.76	4958.21	2159.61	0.994722	515.2	ok
USYYUUY	206.818	102.709	1211.17	1096.71	0.91331	102.08	ok
SYYUUUT	337.403	30.7589	1568.12	236.917	0.997761	162.68	ok
SUYTUTU	1280.28	366.916	3659.69	1368.33	0.994216	379.56	ok
UYYYUUY	112.398	26.2478	769.244	396.564	0.960464	79.76	ok
SSYTTUS	573.018	27.0116	2225.29	155.345	0.999648	230.48	ok
SYYTUUU	275.441	19.4771	1375.27	168.962	0.998392	142.44	ok
YUYTTTT	1511.26	876.247	4070.11	3010.85	0.980267	421.5	ok
UTYYTSY	657.923	72.9271	2414.29	387.144	0.998296	249.96	ok
SSYTTUU	669.8	60.561	2440.25	318.238	0.998891	252.58	ok
TTYYSUS	599.475	48.2317	2288.47	270.455	0.999027	236.8	ok
USYTUYU	366.236	59.6426	1636.86	435.264	0.993447	169.36	ok
STYYSUU	567.242	67.3786	2190.7	387.14	0.997755	226.62	ok
TTYSYUS	577.865	103.548	2201.67	586.084	0.994906	227.68	ok
TYYTTYT	175.026	37.72	1037.87	433.89	0.978134	107.32	ok
YUYSSYS	596.71	33.9169	2292.31	191.295	0.999508	236.88	ok
SYYUSUU	372.219	99.5163	1631.33	712.995	0.982601	168.54	ok
YUYSYSU	529.996	104.266	2131.22	628.919	0.993572	220.18	ok
UYYTTUS	333.413	25.7587	1579.96	201.763	0.998414	163.2	ok
TUYYTSU	700.428	159.536	2483.41	811.901	0.993237	256.48	ok
YTYUSSU	1431.11	277.853	3900.46	974.655	0.997607	402.7	ok
TSYSUUU	341.617	45.5317	1576.93	347.641	0.995371	162.8	ok
STYSSST	1204.17	79.6586	3494.24	304.661	0.999666	360.7	ok
USYTUUY	565.669	202.487	2147.98	1150.65	0.979429	221.6	ok
UUSUUUT	368.441	147.737	1642.48	1074.13	0.962404	165.52	ok
YTYSUUS	850.039	165.188	2877.34	771.921	0.996017	296.64	ok
TUYUSTY	2766.35	471.727	5638.42	1156.46	0.999039	581.28	ok
SYYUSTY	330.085	52.2646	1528.36	404.691	0.993146	157.56	ok
STYYTYY	385.814	27.8244	1737.16	200.496	0.998789	179.08	ok
TTYTYUY	615.985	60.8856	2333.85	336.94	0.998591	240.56	ok
UTYSYUT	486.221	40.7242	2015.29	257.548	0.998722	207.72	ok
UTYTSTT	1701.28	1446.15	4387.14	4688	0.963731	452.08	ok
UUYUSTU	1803.61	890.497	4483.09	2771.04	0.988041	461.96	ok
TUSUTUS	380.073	54.466	1694.8	391.913	0.995256	174.64	ok
YTYSSST	967.343	101.713	3057.58	437.177	0.998947	315.06	ok
TSYTTTY	543.314	49.8001	2148	294.639	0.998601	221.28	ok
UTYUSSU	2573.82	823.162	5452.89	2109.03	0.996404	561.68	ok
UUYSSSY	1509.82	233.906	4021.68	796.853	0.998555	414.2	ok
TYYUTSY	276.193	31.6467	1404.23	277.411	0.995857	144.52	ok
YTYTSTT	1363.56	410.475	3722.76	1456.66	0.993943	383.12	ok
UUYTYYS	943.081	383.216	3092.1	1703.91	0.98462	318.16	ok
TSYUYTY	258.414	134.019	1393.66	1249.65	0.923572	119.72	ok
STYUYUU	1113.11	269.021	3379.46	1084.68	0.99533	347.56	ok
TSYSTTT	310.769	20.0829	1512.08	164.032	0.998811	155.48	ok
TYYUUTU	215.116	18.116	1157.02	180.89	0.997143	118.96	ok
UTYYSST	783.738	261.372	2765.44	1286.2	0.987602	284.32	ok
USYTTSS	589.014	96.5249	2299.62	552.774	0.995968	236.4	ok
YSYUUYT	404.591	51.4646	1809.26	363.399	0.996484	185.9	ok
UTYTSYU	1375.27	482.09	3847.61	1740.86	0.992045	395.08	ok
YUYYUTU	310.427	68.0443	1457.75	543.465	0.986069	149.64	ok
YTYSTSS	731.903	81.0071	2616.95	409.862	0.998494	268.6	ok
UTYSYUS	594.839	246.098	2214.93	1358.92	0.974083	227.24	ok
YTYUTUU	1787.52	404.132	4415.29	1253.33	0.997402	452.96	ok
TTYYUYY	351.647	43.1828	1655.2	330.633	0.996242	169.76	ok
YTYTYYS	590.193	155.44	2326.61	895.806	0.989776	238.32	ok
UUYYTYS	431.679	67.788	1899.64	463.684	0.994969	194.56	ok
TSYSTSS	346.754	21.1266	1623.88	161.992	0.999056	166.24	ok
UYYSUYT	170.387	21.2339	997.02	245.077	0.992195	102	ok
SUYSSUS	1108.6	302.449	3393.23	1228.27	0.994053	347.12	ok
YSYTTUS	477.396	77.7041	1964.95	491.855	0.99504	201	ok
TTYSYST	735.197	53.5495	2605.43	268.855	0.99935	266.48	ok
UYYUSST	522.425	69.4912	2094.01	420.039	0.99695	214.16	ok
STYSYTU	795.114	171.281	2706.45	817.671	0.994714	276.78	ok
UUYYYSS	409.307	68.5543	1779.35	473.166	0.993902	181.96	ok
UYYSTTT	172.636	11.5192	1002.57	131.646	0.997767	102.52	ok
UYYTUYY	212.027	34.3293	1133.49	343.502	0.98902	115.88	ok
SSYUSTT	598.518	65.3157	2303.33	368.53	0.998234	235.44	ok
TTYSTSS	1201.08	469.996	3572.15	1833.32	0.988799	365.08	ok
YTYTUYT	1151.71	358.784	3480.16	1430.21	0.992516	355.64	ok
UTYTTTY	1734.84	1330.53	4466.41	4291.46	0.970768	456.36	ok
TUYTYSY	840.06	122.663	2855.08	576.659	0.997757	291.68	ok
YUYSUST	741.411	99.9783	2652.27	504.294	0.997808	270.66	ok
UTYYUTY	399.078	30.266	1778.87	214.213	0.998737	181.52	ok
UUYYUTS	468.455	104.436	1934.27	666.457	0.990487	197.28	ok
UTYUSTT	1991.01	439.327	4728.82	1293.4	0.997809	482.24	ok
TUYUYSY	975.168	80.6929	3107.4	348.284	0.999371	316.88	ok
TTSUTSU	245.919	29.3647	1286.82	273.713	0.99509	131.08	ok
YUYYUYT	445.473	33.4323	1920.76	223.281	0.998878	195.62	ok
YUYUSUY	1834.97	325.759	4526.21	1004.14	0.998462	460.66	ok
YUYYSUY	456.843	41.1726	1943.73	270.32	0.998423	197.8	ok
SUYSUTS	892.218	86.8518	2956.36	394.596	0.999049	300.56	ok
TSYTTST	503.166	74.693	2053.75	462.477	0.996103	208.76	ok
STSSUUT	183.429	106.277	1171.42	1253.82	0.884201	87.84	ok
SSYSUYY	332.332	33.6472	1598.63	266.445	0.997286	162.42	ok
SYYUTUY	416.532	37.0289	1822.67	255.238	0.998299	185.16	ok
YUYUYYT	874.089	139.499	2941.07	644.423	0.997409	298.72	ok
SUYUSTY	2115.94	833.627	4938.43	2393.01	0.993492	501.56	ok
STYYYTY	324.179	81.3172	1517.54	638.184	0.982616	154.1	ok
TYYTUTY	239.456	24.1621	1268.88	229.298	0.996351	128.8	ok
YUYSSTT	1007.38	133.159	3191.83	567.817	0.998451	323.88	ok
SYYUTTS	275.273	15.786	1392.66	138.116	0.998954	141.28	ok
TYYSUUS	230.037	27.3053	1259.24	268.469	0.994826	127.68	ok
TSYUYTU	219.146	18.6405	1182.55	185.133	0.997156	119.88	ok
YUYTUTT	1165.15	196.276	3445.71	767.451	0.997831	349.28	ok
UUYTYUT	682.3	132.591	2537.48	703.612	0.995199	257.2	ok
YSYTUTY	321.653	99.529	1499.09	781.067	0.974076	149.82	ok
YUYSUSU	793.945	247.001	2803.95	1212.23	0.989417	284.12	ok
UTYUYST	1366.22	960.012	3908.63	3533.33	0.969544	396.04	ok
TUSSTUS	331.725	151.827	1593.37	1201.9	0.949739	147.52	ok
TYYTUUS	307.872	43.8464	1538.08	365.499	0.994391	155.76	ok
STYTSYU	1125.39	156.418	3377.06	623.449	0.998465	341.98	ok
USYUUTU	320.159	34.3837	1530.57	274.748	0.996829	154.88	ok
STYYYTU	327.083	14.5642	1572.41	115.925	0.999472	158.92	ok
UTSTUTU	149.258	35.879	904.505	446.954	0.96951	84.12	ok
UYYTTYY	187.14	21.7768	1091.65	241.388	0.993923	110.24	ok
TUYSSYU	845.761	327.114	2935.49	1559.5	0.984743	296.36	ok
STYUSYT	1205.11	309.566	3588.84	1207.88	0.995181	362.12	ok
UTYYSTT	588.892	75.9412	2315.13	437.073	0.997562	233.56	ok
YYYUSST	292.467	66.6596	1422.46	556.349	0.984168	143.42	ok
SUYYSSU	698.151	191.8	2519.79	989.653	0.990385	253.88	ok
YSYUTUS	508.641	34.0758	2089.28	211.22	0.999215	210.5	ok
UUYTUYT	1496.95	522.071	4080.78	1814.81	0.9929	411.08	ok
UUYSUTU	832.92	300.651	2891.93	1439.24	0.986605	291.32	ok
STYTSSU	1823.92	276.798	4531.89	859.261	0.998878	456.5	ok
UYYUTYU	216.457	22.1762	1173.43	221.942	0.995824	118.16	ok
STYSYTS	777.283	110.106	2750.64	544.158	0.99774	276.92	ok
YUYUTUU	2121.57	805.795	4964.35	2316.94	0.994014	499.78	ok
TTYSTTY	1244	235.14	3627.65	896.288	0.997447	365.16	ok
YUYTSTS	1301.08	130.466	3710.26	483.94	0.999312	373.44	ok
TYYUSSU	430.613	104.985	1925.33	726.526	0.988424	193.76	ok
SSYTUUS	490.375	135.48	2097.32	873.391	0.986828	211.04	ok
UTYYYUU	190.247	14.6752	1079.43	158.947	0.997289	108.6	ok
YUYSTTS	922.48	106.145	3052.49	477.813	0.998726	307.08	ok
TUYTSUS	1840.4	371.035	4563.17	1147.88	0.998046	459	ok
TSYUSUS	806.948	174.681	2756.21	832.81	0.994842	277.08	ok
UUUTUUS	115.73	35.0488	799.813	525.49	0.944732	67	ok
TSYTUTS	393.972	101.491	1746.18	718.656	0.985253	175.52	ok
STYYYST	375.845	47.7546	1719.24	350.804	0.996269	172.8	ok
TYYTUTU	221.314	37.462	1175.34	367.054	0.98877	118.12	ok
TUYTYTS	638.623	111.323	2400.1	606.256	0.995827	241.08	ok
YSYUSSU	426.884	129.918	1825.1	874.594	0.981	183.32	ok
TYYUUTY	200.676	22.7025	1119.69	238.255	0.994524	112.44	ok
UYYTSST	418.719	77.3995	1888.46	543.629	0.993072	189.64	ok
STYYSTS	654.82	277.301	2385.61	1466.42	0.975529	239.54	ok
SUYSUUS	1310.59	514.71	3796.85	1930.06	0.989727	381	ok
UUSUTSY	362.89	52.4941	1688.98	394.707	0.995132	169.48	ok
TTSTTUY	296.132	54.9849	1455.3	459.866	0.990026	146	ok
YUYTUST	1207	122.158	3574.93	474.458	0.999249	358.52	ok
UTYYSUS	650.623	119.029	2429.65	641.896	0.995443	243.64	ok
STYUUYU	2063.03	784.746	4916.87	2302.16	0.993799	493.02	ok
UUYYYTT	234.728	55.6342	1216.73	524.893	0.979313	120.72	ok
USYTSUS	628.486	95.3761	2418.37	530.676	0.996841	242.48	ok
TSYSTSU	318.626	29.0369	1568.83	236.903	0.997782	157.28	ok
USYTTTY	507.844	25.9659	2107.32	162.172	0.999552	211.24	ok
YUYUYTS	818.651	95.8281	2808.62	456.674	0.998516	281.34	ok
TTYUTSU	2142.76	610.409	5005.6	1749.68	0.996661	501.36	ok
UYYTUST	257.389	20.4294	1339.34	186.527	0.997897	134.12	ok
UYYSUUT	228.441	38.722	1277.84	386.867	0.989563	127.96	ok
TUSSUYU	165.205	18.3786	969.103	215.199	0.993734	97.04	ok
SUSTSTU	287.716	184.764	1550.71	1656.82	0.903482	125.2	ok
YUYSUYT	815.243	58.2222	2823.9	279.747	0.999447	282.4	ok
STYYUTT	390.794	42.8272	1791.18	310.979	0.997389	179.08	ok
UTSTTTU	192.687	34.052	1068.86	362.027	0.986428	106.8	ok
TTSUSYU	356.377	254.755	1776.41	2017.22	0.902658	143.48	ok
SUSTUYS	305.81	33.9172	1497.16	279.728	0.996547	149.56	ok
STYYSSY	627.844	221.162	2350.54	1206.93	0.98237	234.8	ok
UTSUTSS	329.898	66.57	1551.28	520.746	0.989341	154.92	ok
UUSTTYS	254.03	104.552	1359.61	976.368	0.949408	120.72	ok
YYYUTTY	236.938	37.2568	1307.64	364.046	0.991297	130.52	ok
UTSTTTT	241.165	44.5831	1258.58	417.986	0.988099	125.6	ok
YTYSYYT	589.242	203.213	2376.18	1190.84	0.983084	237.02	ok
UUYUYYU	1223.97	405.63	3543.31	1542.9	0.992049	353.36	ok
TTSUTTU	257.722	36.7172	1325.64	332.663	0.993399	132.2	ok
TUSTTSY	308.463	59.7526	1559.22	501.555	0.990023	155.44	ok
YUYUSTT	1545.03	252.378	4144.62	860.617	0.998491	413.14	ok
TSYTUYY	395.278	30.3586	1801	218.744	0.998714	179.44	ok
UYYSTUS	260.251	32.41	1344.05	293.303	0.994748	133.8	ok
UUYYUYY	428.584	90.0206	1866.19	612.763	0.99107	185.76	ok
TTYUUTY	1548.05	139.852	4145.46	476.046	0.999536	412.52	ok
YUYTYYS	525.531	86.4187	2190.41	535.9	0.995587	217.88	ok
YUYTYTU	617.927	56.6234	2379.09	316.691	0.998822	236.64	ok
SYYTTTU	237.029	20.4711	1287	197.988	0.997355	128	ok
YTYYTTY	435.775	62.3575	1891.98	421.37	0.995871	188.1	ok
TTYYYUT	241.649	21.2811	1288.09	201.992	0.997284	128.04	ok
UYYTSUU	323.057	28.7274	1580.39	232.271	0.997929	157.08	ok
YYYUTUY	305.569	22.7509	1525.44	190.061	0.998442	151.6	ok
TSYTSTY	624.561	165.362	2450.69	934.766	0.990561	243.52	ok
STYYYSS	339.489	92.0891	1596.21	713.15	0.981016	158.46	ok
YTYSTUY	1257.18	279.236	3707.7	1071.36	0.996581	367.92	ok
STYTYTU	793.933	68.9817	2795.16	337.764	0.999175	277.28	ok
YUYYSYU	350.427	104.309	1718.4	821.563	0.979284	170.44	ok
YUYYSSU	576.423	82.8081	2274.77	480.851	0.99686	225.62	ok
TTYYSST	925.533	115.75	3082.02	523.127	0.998526	305.68	ok
SUSSUUT	228.678	29.8498	1245.46	293.239	0.993905	123.48	ok
SUYTSUT	1566.68	213.231	4183.83	722.503	0.998972	414.72	ok
YTYSYYS	492.582	63.248	2104.22	406.839	0.997124	208.52	ok
TTYUSUS	2150.78	470.739	5032.58	1350.28	0.998056	498.58	ok
STYYTYU	440.561	48.0151	1942.75	326.784	0.997676	192.42	ok
TUSSUUT	222.699	29.0768	1234.63	291.747	0.993807	122.28	ok
UUYUYYT	1294.56	166.589	3757.2	627.207	0.998885	372.12	ok
YTYUSYS	1010.84	125.168	3227.89	536.495	0.998672	319.68	ok
YTYYTYT	343.319	68.1487	1614.69	525.811	0.989948	159.86	ok
TTYTSYS	1711.04	176.456	4405.93	570.722	0.999455	436.2	ok
YUYUTSY	1402.86	364.406	3951.86	1317.61	0.995812	391.1	ok
USYSUSU	251.157	29.8944	1342.94	280.19	0.995286	132.88	ok
UUYUYTS	921.165	120.147	3078.09	545.048	0.998402	304.52	ok
TTYTYSU	916.153	240.49	3000.85	1076.1	0.993397	296.84	ok
UUYSSUS	1324.9	367.601	3827.79	1372.3	0.994998	378.6	ok
TSYUYTS	234.506	22.6537	1267.18	219.339	0.996661	125.32	ok
YYYUUYY	272.127	76.4099	1368.92	668.97	0.974889	134.18	ok
UTSUUUY	319.17	70.8335	1521.4	565.555	0.986774	150.4	ok
TUYTSST	2250.6	1171.73	5211.87	3306.4	0.989635	515.2	ok
STYSYSY	859.8	584.322	2842.5	2675.11	0.953889	278.2	ok
YSYUUUT	476.225	30.7811	2032.27	199.908	0.999246	200.84	ok
SUYUYTS	1172.62	166.572	3511.64	656.741	0.998494	346.96	ok
UUSTUUS	348.74	58.3818	1647.77	449.397	0.993302	162.8	ok
YTYSSUS	816.406	67.1686	2848.03	324.321	0.999284	281.22	ok
TYYUTTT	282.635	72.6037	1499.78	648.612	0.98123	148.08	ok
SUYUYSS	1223.1	180.672	3599.61	696.206	0.998433	355.2	ok
TUYYSYS	564.296	68.3148	2247.85	401.811	0.997721	221.8	ok
TYYSUTT	136.55	29.2237	868.103	388.768	0.973294	79.36	ok
YUYUUTY	1615.61	528.544	4309.86	1778.56	0.994305	424.82	ok
USYUUTY	372.767	26.3182	1732.03	195.893	0.998854	170.72	ok
SYYTTSY	227.527	18.6977	1266.42	186.52	0.997501	124.82	ok
TYYTSYY	230.926	93.0772	1294.99	927.532	0.946617	112.84	ok
TUYTSUU	1824.74	800.266	4638.4	2530.51	0.991035	456.8	ok
SUYUYUS	1205.32	277.132	3607.98	1085.63	0.996219	355.24	ok
YSYTUTS	313.653	49.4368	1528.37	402.851	0.993222	150.46	ok
UUSUTSU	373.391	54.3182	1741.5	405.1	0.995316	171.44	ok
UYYSSTU	213.103	52.6514	1225.48	549.566	0.977097	120.64	ok
UYYUYSS	242.176	26.2497	1320.21	252.445	0.995978	129.96	ok
SYYTUYU	264.876	31.7416	1366.48	285.187	0.99536	134.48	ok
YTYSUTU	673.694	141.021	2560.05	762.808	0.99455	251.94	ok
SYYUUYU	352.779	35.1473	1674.03	270.255	0.997595	164.72	ok
TYYUTTU	264.034	28.2876	1408.52	259.886	0.99643	138.52	ok
SUYTSYT	1252.11	216.9	3707.03	835.452	0.99792	364.44	ok
TTYSSTT	1614.98	383.177	4301.95	1287.99	0.996994	422.88	ok
TYYUSTU	369.327	79.7879	1759.62	605.774	0.989626	172.88	ok
YTYYTSU	337.22	61.7178	1669.96	495.659	0.991852	164.06	ok
TTYUSYU	1899.32	403.696	4715.46	1243	0.997949	463.24	ok
SSYUTSY	460.549	36.9588	2016.12	246.833	0.998804	198.02	ok
UTSTUUS	250.985	80.575	1320.14	747.669	0.966917	125.28	ok
UTSUUUU	255.461	42.373	1330.35	388.162	0.991117	130.56	ok
STYYSYT	427.857	143.944	1851.91	976.386	0.97701	181.7	ok
UUYYSTS	685.42	165.238	2608.95	890.733	0.992907	255.96	ok
YSYTTUU	462.154	59.3866	2021.12	395.919	0.996974	198.28	ok
TUSSTUT	297.549	94.7235	1464.96	791.784	0.971624	141	ok
TTYSSTU	1386.77	341.312	3946.19	1247	0.996246	386.72	ok
STYUSST	2412.25	1613.62	5470.76	4423.25	0.98437	536.12	ok
UYYTTTS	305.868	25.4485	1523.33	212.199	0.998071	149.28	ok
YYYTTTT	237.147	39.1516	1257.41	373.069	0.990087	123.22	ok
SYYTSTT	355.084	112.96	1630.34	848.027	0.975424	159.72	ok
SUYTSYY	1088.55	267.509	3369.17	1100.33	0.995146	330.04	ok
YTYUYTS	776.118	108.988	2787.76	544.825	0.997847	273.06	ok
TUSSUYS	192.119	62.5082	1130.63	689.22	0.958136	98.8	ok
TTYSYSS	732.53	92.0249	2665.54	471.53	0.998144	261	ok
UUYTTST	2333.07	1170.09	5344.45	3252.29	0.990846	523.2	ok
TSYUTSY	608.232	60.6267	2408.82	347.572	0.998609	235.8	ok
UTYUTSS	2528.94	1470.37	5595.69	3917.99	0.988626	547.72	ok
TTYTSUU	1940.69	424.5	4750.4	1286.94	0.997875	464.4	ok
TTYYSYS	526.936	128.049	2222.37	800.072	0.990653	217.24	ok
TTYSSYS	1082.56	190.358	3422.61	796.937	0.99755	334.44	ok
YUYTYSY	692.059	109.193	2615.41	584.028	0.99694	255.54	ok
UTYTYYS	1037.83	178.879	3333.87	765.501	0.99756	325.6	ok
TTSUTSS	302.164	44.3726	1495.74	370.145	0.994012	146.08	ok
UTYSYTT	530.104	136.475	2169.1	833.263	0.98933	211.68	ok
TYYUTUU	361.812	53.6797	1743.3	413.434	0.995009	170.12	ok
UYYSUST	160.934	14.5589	986.292	176.79	0.995778	96.24	ok
UYYUTYS	261.743	45.1095	1417.35	419.721	0.990834	138.28	ok
USYUSTU	624.571	100.969	2418.82	565.395	0.996438	235.64	ok
UTYYTTY	630.45	31.8235	2450.33	178.194	0.999654	238.68	ok
TUYSYSU	686.564	118.197	2551.9	625.907	0.996317	248.56	ok
TYYUTYU	224.067	17.2304	1235.74	171.923	0.997768	120.32	ok
SSYSTSY	329.848	41.7662	1601.07	333.56	0.995824	155.84	ok
YUYSYUU	599.693	87.0308	2402.29	505.063	0.997054	233.82	ok
USYYUUT	182.15	21.595	1092.38	246.028	0.993774	106.32	ok
SUYSSYU	754.661	282.263	2795.93	1454.3	0.984635	272.08	ok
STSUTUS	392.402	98.0558	1859.21	727.15	0.987224	180.86	ok
SUYSSTU	1331.92	567.078	3769.28	2080.41	0.988273	366.48	ok
UYYUSTY	403.819	90.9415	1803.67	642.045	0.989311	175.36	ok
YTYTUTU	981.941	580.655	3292.54	2601.25	0.971372	320.1	ok
TSYUSTS	681.703	62.929	2583.48	338.638	0.998942	251.16	ok
SUYTTUU	2287.2	1633.26	5336.8	4625.18	0.981471	518.56	ok
UTSUSSU	434.7	136.597	1881.12	921.694	0.980788	182.76	ok
SYYUUTU	211.379	18.2336	1188.16	188.286	0.997072	115.42	ok
SSYTUTY	477.546	166.26	2009.7	1068.51	0.978455	195.14	ok
STYYTTY	638.889	175.468	2517.35	988.671	0.990054	244.42	ok
UUYYSSY	885.101	255.925	3070.09	1205.93	0.992113	298.04	ok
UTYYYYU	337.489	25.6431	1646.79	203.89	0.998559	159.84	ok
YUYYUYU	458.348	89.8082	1987.78	596.819	0.992843	192.62	ok
TSYUTSU	598.724	77.0744	2404.88	448.355	0.997676	233	ok
UYYUUTS	204.258	20.6331	1183.45	219.962	0.99597	114.64	ok
USYTUST	422.368	30.6473	1915.93	215.508	0.998962	185.56	ok
TUYTSSS	2546.91	1732.15	5649.77	4620.14	0.984805	547.14	ok
SUYUYSU	1140.75	134.279	3530.52	546.481	0.998967	341.72	ok
STSUUYT	364.975	152.159	1708.83	1146.41	0.961918	157.68	ok
TTSUSYY	367.511	316.786	1893.33	2539.49	0.875859	140.96	ok
STYYSYS	403.527	56.1116	1885.06	408.446	0.995999	182.28	ok
UUYYYUS	316.98	62.4836	1548.59	508.13	0.989573	149.72	ok
YTYYUSY	570.089	50.3921	2330.34	300.997	0.998834	225.28	ok
TSYTTUY	716.188	179.103	2703.51	948.477	0.992771	261.32	ok
UYYUUSS	323.996	60.0782	1574.83	483.234	0.991037	152.16	ok
UTYYUSS	483.284	88.5089	2112.43	581.863	0.994262	204.08	ok
YUYTSSU	1354.54	446.633	3841.73	1635.53	0.99307	371.08	ok
SUYYSYY	369.611	98.9758	1803.57	763.407	0.98409	174.2	ok
TUSUUYS	324.773	83.0877	1566.28	664.353	0.983161	151.28	ok
TUSTUSY	242.178	47.0409	1287.83	445.463	0.987354	124.36	ok
USYSUTY	250.338	20.9459	1351.02	197.703	0.997701	130.4	ok
SUYSTSU	1174.73	70.6392	3581.11	282.276	0.999736	345.56	ok
USYSUUU	351.548	54.3641	1713.43	425.999	0.994417	165.32	ok
TYYUUYU	266.146	57.0875	1368.89	511.026	0.985342	132	ok
TUSSTTT	217.105	32.1242	1196.28	324.317	0.991664	115.32	ok
TYYUSSS	561.869	52.247	2309.12	314.583	0.998704	222.56	ok
TYYTSYU	247.698	36.1218	1315.76	338.928	0.992758	126.8	ok
SYYTUUT	335.955	57.8659	1679.23	468.183	0.992794	161.74	ok
UYYUUUS	322.88	52.0089	1633.05	429.862	0.993477	157.08	ok
TSYUUSS	487.373	49.9246	2118.16	326.07	0.998217	203.72	ok
SUYYUYS	725.879	109.943	2716.24	576.446	0.99732	261.16	ok
USYTSTU	565.79	81.2657	2308.51	485.826	0.996992	221.92	ok
SUYYTYS	418.186	33.7975	1920.42	240.42	0.998696	184.6	ok
YUYYUSU	427.938	70.0915	1922.48	487.593	0.994726	184.78	ok
UYYSTUU	254.012	33.6791	1393.79	319.494	0.994344	133.96	ok
TUYYUYS	482.516	164.242	2151.82	1095.53	0.980599	206.8	ok
UUYTSST	2601.04	573.276	5697.86	1507.97	0.998407	547.56	ok
STYYUST	407.67	93.4614	1839.12	662.237	0.989076	176.72	ok
YUYSUYS	536.51	76.8649	2251.86	476.115	0.996832	216.38	ok
SSYUSSS	597.486	177.62	2436.09	1045.04	0.987906	234.08	ok
UTYUSTY	2060.83	1168.02	5042.16	3502.09	0.987104	484.44	ok
UUYYTUY	817.679	113.791	2919.32	558.811	0.998007	280.48	ok
SUSTUYY	359.754	94.0146	1675.95	709.419	0.983969	161	ok
STYTSUS	1636.45	187.6	4340.23	626.774	0.999313	416.82	ok
STYTTTT	1899.16	689.723	4798.11	2154.3	0.994166	460.7	ok
TTSTTUT	281.613	64.3021	1420.84	556.954	0.984774	136.4	ok
TUYYYTU	211.978	45.615	1260.1	486.907	0.98302	120.96	ok
UUYSTST	1384.86	582.059	4029.97	2165.37	0.98938	386.8	ok
TUSTUTU	161.329	49.3847	1018.33	609.474	0.958336	87.48	ok
UTSUTTU	289.973	105.998	1478.63	914.596	0.964047	135.8	ok
UYYUTYY	211.181	21.8316	1208.09	227.948	0.995836	115.84	ok
YUYYSUU	475.832	100.165	2033	651.218	0.992151	194.8	ok
STSUSST	264.866	43.9038	1397.56	400.107	0.99156	133.9	ok
YUYYUTY	362.385	71.0188	1719.52	541.139	0.991097	164.74	ok
UTSTTUS	328.195	105.179	1573.49	834.713	0.974284	149.76	ok
YTYSTTT	854.422	121.353	3005.77	582.959	0.998022	287.9	ok
TUSUTTU	321.424	37.8691	1608.23	311.269	0.996551	154	ok
TSYSUST	240.887	22.8252	1314.9	220.132	0.996916	125.88	ok
TTYUSTS	2575.85	1626.83	5716.34	4332.9	0.987251	547.2	ok
TUYTYTU	600.869	102.419	2426.67	597.525	0.996003	232.12	ok
TTSSTUS	218.621	75.4174	1250.25	776.79	0.95922	108.8	ok
TUSUUSU	272.702	41.1306	1416.74	367.219	0.993257	135.36	ok
TYYUSTY	440.478	99.0811	1942.66	674.436	0.990284	185.56	ok
YTYUYSY	865.699	181.239	2970.17	851.628	0.995707	283.7	ok
YTYTUYS	710.055	273.098	2599.92	1417.49	0.982445	248.2	ok
UYYYUUU	104.072	10.3231	703.187	160.386	0.992012	67.12	ok
UTYTYTY	491.345	45.8952	2133.01	298.787	0.998539	203.56	ok
UTYTSYY	1363.32	293.98	3957.93	1095.13	0.997138	377.6	ok
SSYUUTT	391.42	93.9909	1793.66	682.034	0.98777	171.1	ok
YUYSUSY	930.301	296.208	3190.39	1367.28	0.99094	304.3	ok
UTSUYYT	234.215	91.8058	1322.81	914.022	0.951859	114.08	ok
YTYTSYY	1016.65	67.6099	3321.42	294.511	0.999631	316.54	ok
TTYTYST	1001.24	98.8389	3292.14	434.211	0.999193	313.64	ok
TYYUTST	377.405	33.0873	1788.43	248.522	0.998302	170.36	ok
SUSUYUS	230.028	76.5518	1280.72	760.595	0.963157	115.48	ok
YUYTSYS	914.724	347.532	3058.9	1580.18	0.986537	291.2	ok
TYYSSTT	293.812	28.4244	1532.95	247.746	0.997421	145.92	ok
YTYSUSU	746.89	130.34	2726.9	666.088	0.996558	259.52	ok
TYYTUSS	265.592	54.1121	1392.08	490.572	0.986967	132.48	ok
STYUYTY	1139.45	345.928	3589.97	1427.89	0.993302	341.56	ok
YUYSYSS	587.997	71.0438	2397.69	419.909	0.997941	228.12	ok
TTYTUSU	1486.27	642.894	4207.97	2306.82	0.98962	400.32	ok
YYYTTUT	325.215	89.8804	1582.94	722.655	0.980361	150.5	ok
UUYTSYS	1644.44	447.556	4435.6	1514.38	0.996227	421.68	ok
UYYTSUY	386.445	74.045	1858.17	557.347	0.992346	176.64	ok
YSYTUSU	322.88	55.1216	1653.48	459.331	0.992802	157.14	ok
YUYSUTY	829.765	142.653	2969.2	699.171	0.99706	282.14	ok
YSYSTUT	358.706	53.7931	1714.05	413.212	0.994729	162.82	ok
USYTTST	631.952	130.637	2462.15	732.298	0.994341	233.8	ok
UUYSSTT	1381.77	352.415	4013.43	1309.69	0.996108	381.04	ok
USYYUUU	178.14	27.6031	1050.04	314.116	0.988973	99.68	ok
UUSTUST	251.242	63.7838	1336.26	595.758	0.979473	126.84	ok
TTYTSUT	2057.25	718.078	4943.42	2121.89	0.995003	468.88	ok
SUYTTUY	2786.06	2331.31	6052.25	6024.4	0.979535	573.76	ok
TTYUYTY	752.873	89.6609	2759.32	458.553	0.998422	261.52	ok
SSYYTUT	207.556	26.0044	1183.02	272.757	0.993774	112.1	ok
UUYTYTS	676.579	49.1736	2606.5	268.355	0.99935	246.88	ok
YTYSTSU	902.868	197.283	3127.89	924.294	0.995607	296.26	ok
TUSTUSU	260.921	146.017	1484.73	1403.88	0.920719	116	ok
SSYTTYU	384.765	126.718	1769.35	926.895	0.976497	167.38	ok
UYYTTSU	324.593	28.1671	1622.44	230.588	0.998074	153.4	ok
USYUUYS	536.657	35.0702	2254.07	217.323	0.999338	213.08	ok
SUYTYUS	982.278	331.964	3314.39	1494.21	0.990558	313.28	ok
UUSTUTU	173.266	38.8681	1039.8	452.134	0.977569	95	ok
UUSSTSY	277.501	175.992	1567.73	1647.93	0.905665	120.2	ok
TTYUSYT	1949	828.351	4917.75	2572.63	0.992365	464.64	ok
SSYSTUY	480.365	24.6275	2106.58	162.572	0.999541	199	ok
SYYTUTS	224.099	40.8422	1245.71	409.479	0.987808	117.58	ok
UTYSTST	1326.92	170.338	3910.59	645.755	0.998963	369.08	ok
USYSTSY	367.099	60.6584	1760.9	463.556	0.993903	166.16	ok
TUYSYUY	560.738	64.1067	2328.5	389.081	0.998096	219.64	ok
USYTYST	280.743	100.968	1543.9	925.254	0.965853	145.56	ok
SSYTUTT	359.788	77.6088	1710.12	593.452	0.989358	161.16	ok
STYTYUY	985.637	227.735	3303.41	1018.97	0.995553	311.26	ok
UYYUSYS	350.048	68.6628	1762.41	550.602	0.991242	166.04	ok
SUYYYSS	317.827	28.3014	1633.38	237.666	0.997977	153.88	ok
YTYTYTY	734.313	360.875	2668.57	1846.16	0.972889	251.34	ok
YTYYSYS	313.366	30.6867	1588.19	256.608	0.997471	149.58	ok
YUYSYYS	483.671	30.2164	2129.74	199.621	0.999328	200.58	ok
SSYTYTS	300.813	131.321	1562.17	1131.71	0.951878	135.86	ok
STYTTUU	2673.52	357.862	5805.79	930.403	0.999439	546.66	ok
STYSTSY	1029.25	368.442	3418.84	1621.01	0.98985	321.62	ok
YTYSUST	789.636	72.0673	2872.18	362.045	0.999119	270.16	ok
SSYTTSS	433.581	46.002	1997.8	324.288	0.997883	187.84	ok
SYYUTTY	295.933	76.9465	1591.02	682.136	0.982263	149.56	ok
TUYSYYT	775.349	277.565	2894.17	1428.21	0.986683	272.04	ok
YSYUTUU	527.368	53.3458	2242.6	335.182	0.998419	210.78	ok
UUSUUUU	271.33	57.1472	1493.57	530.384	0.987593	140.36	ok
SUSUTTT	379.479	128.538	1747.02	945.232	0.975185	164.16	ok
TUYSUYT	930.5	473.187	3262.29	2221.24	0.977973	306.52	ok
SUYUSTU	2001.65	321.406	4967.45	980.028	0.998933	466.56	ok
TUSTUYT	292.594	99.759	1494.68	858.996	0.968893	135.32	ok
STYYUTS	405.548	37.2307	1886.59	269.807	0.998306	177.16	ok
UUSUSYT	422.108	189.748	1902.71	1328.81	0.962288	172.6	ok
TTSUUYU	250.469	128.622	1436.44	1261.32	0.929309	115.36	ok
TSYUUSY	491.139	56.3044	2128.94	366.216	0.997803	199.72	ok
TUSUTTY	352.343	56.0738	1720.48	439.603	0.994338	161.36	ok
TUSUTSU	383.129	45.3308	1814.5	338.678	0.997068	170.16	ok
TSYUTUS	782.954	162.128	2896.57	826.641	0.995532	271.52	ok
TYYUYYT	115.788	15.4148	829.836	235.788	0.988185	77.76	ok
YTYTUUS	1319.65	306.256	3942.09	1174.87	0.996643	369.38	ok
TUYYSSS	887.201	370.408	3158.78	1779.29	0.984292	295.92	ok
USYUTYT	401.831	45.5121	1904.02	334.963	0.997447	178.36	ok
TSYUYSU	316.234	24.8973	1625.24	209.444	0.998423	152.24	ok
TTYYSYY	413.193	139.233	1866.33	983.1	0.977286	174.8	ok
SUYYUST	390.91	33.6834	1872.76	251.977	0.998453	175.36	ok
UYYSTYY	131.769	10.2641	883.718	142.932	0.996277	82.72	ok
YUYTSUY	1530.45	467.657	4224.13	1634.62	0.994916	395.28	ok
TSYSSYT	351.489	66.233	1761.26	528.709	0.992003	164.64	ok
STYSUTY	877.074	140.35	3098.42	672.049	0.997622	289.5	ok
TTYTSUS	1826.17	659.228	4757.13	2126.36	0.994178	444.48	ok
YUYTYSU	570.564	125.373	2400.19	764.236	0.993256	224.24	ok
YTYSYUS	662.59	186.503	2540.98	1020.17	0.99008	237.38	ok
SUYSTSS	1023.91	631.124	3475.11	2826.67	0.970645	324.52	ok
USYUYTU	271.9	120.609	1486.4	1113.59	0.947371	124.2	ok
YUYTYSS	630.48	169.129	2553.61	975.758	0.990901	238.3	ok
SUSTTUY	448.566	53.354	2021.07	366.469	0.997448	188.48	ok
YUYSSTU	1019.75	98.5174	3367.75	432.427	0.999249	314	ok
YTYTYSY	784.46	184.357	2837.29	923.811	0.994179	264.48	ok
USYUUYY	429.808	71.5081	2008.74	510.438	0.994845	187.24	ok
TYYYTUS	116.71	5.16966	815.792	77.7074	0.998672	76.04	ok
TSYTSUS	650.105	74.3912	2551.97	416.038	0.998358	237.84	ok
TUYYYSS	399.042	60.5121	1875.7	443.923	0.99528	174.76	ok
YUYYTSY	513.984	181.406	2281.88	1183.98	0.980927	212.6	ok
UTSSTUS	238.613	44.6159	1306.44	432.646	0.988409	121.68	ok
TUSTTYT	291.796	128.21	1544.2	1130.53	0.951545	132.6	ok
TSYSTUS	445.789	38.5671	2040.99	268.369	0.998643	189.96	ok
SUYYUTY	483.238	187.799	2066.86	1216.11	0.974213	192.28	ok
TSYUTTY	545.34	176.658	2358.05	1112.44	0.98487	219.32	ok
YUYYSUT	551.638	256.781	2234.93	1538.68	0.967882	207.84	ok
USYYTTU	192.282	66.1206	1177.52	746.505	0.954912	99	ok
UUYSYUS	624.197	72.0135	2502.43	413.523	0.998264	232.64	ok
TYYUSYY	273.175	52.5033	1445.17	473.896	0.988813	134.32	ok
YTSUUYY	278.152	111.898	1488.38	1010.79	0.956642	129.52	ok
TYYTTSY	322.324	39.4739	1629.13	326.307	0.996266	151.4	ok
UTSTUUT	238.378	29.7797	1324.91	291.602	0.994893	123.08	ok
STYYYYS	369.913	69.7452	1767.62	530.295	0.99197	164.2	ok
TTYTYUU	627.725	71.3764	2526.57	410.411	0.998353	234.64	ok
SSYYUUT	190.4	7.19422	1158.45	81.2203	0.999401	107.58	ok
UUYYUSY	610.871	83.6954	2501.43	490.945	0.997523	232.24	ok
SYYSSTU	207.265	45.2271	1179.87	474.278	0.981279	109.52	ok
TTYYTYS	450.495	50.0561	2039.95	344.555	0.997769	189.28	ok
YTYTUTY	1417.45	201.656	4079.47	740.117	0.998835	378.5	ok
TTYUYTT	845.36	102.333	3011.54	497.576	0.998596	279.32	ok
YUYYUSS	440.614	87.0946	2048.18	614.662	0.992964	189.96	ok
UTSTTUT	301.251	33.279	1563.63	286.553	0.996843	145	ok
YUYTYYU	651.223	208.588	2632.73	1191.35	0.987455	244.14	ok
UTYYYTT	215.48	38.6023	1224.53	398.289	0.988023	113.52	ok
SUYYUUY	824.239	199.028	3015.76	993.591	0.994242	279.56	ok
TYYTSTU	406.008	35.6087	1918.43	260.717	0.998484	177.8	ok
STYSYYU	746.973	162.586	2837.98	855.756	0.994876	262.98	ok
YYYTUUT	307.084	46.8601	1569.27	396.758	0.99383	145.4	ok
TSYYUUS	196.149	40.7383	1221.16	460.973	0.9835	113.12	ok
UTYYSYS	666.378	298.107	2546.33	1623.86	0.97537	235.64	ok
UYYTSTY	383.747	80.9806	1814.95	604.153	0.990643	167.88	ok
UTYSTYY	846.176	65.5504	3022.07	319.261	0.999422	279.52	ok
UTYSTYU	1012.37	113.929	3381.37	505.287	0.998987	312.68	ok
USYTSTT	555.104	72.4353	2319.35	442.846	0.997519	214.44	ok
TSYUSSY	858.663	124.69	3078.15	606.84	0.998011	284.52	ok
YYYUUSU	238.048	22.6156	1355.38	224.936	0.997003	125.28	ok
STYSUUY	1429.9	842.809	4208.91	3143.94	0.980663	389.02	ok
UUSTTTT	272.407	48.1834	1474.34	441.735	0.991088	136.24	ok
SYYTUYS	351.182	150.841	1722.28	1187.28	0.958923	151.02	ok
UYYUSTU	431.86	37.4115	1997.46	264.751	0.998615	184.56	ok
STYSSUU	1195.86	153.146	3729.23	620.53	0.99888	344.52	ok
USYSSYS	399.372	113.66	1853.66	826.482	0.983543	171.24	ok
YTYSTTS	949.504	313.578	3302.81	1456.25	0.990826	304.98	ok
TYYUUSS	298.624	49.9062	1537.25	428.747	0.992355	141.88	ok
SSYUTUU	736.767	156.585	2747.28	815.682	0.994958	253.52	ok
SUYYTUS	857.887	198.384	3097.46	970.955	0.994981	285.72	ok
TSYSTTS	357.421	26.0539	1774.95	205.589	0.998821	163.64	ok
UUYTYYU	913.907	146.502	3148.24	681.439	0.997707	290.24	ok
STYTSYY	1048.67	303.009	3484.66	1327.91	0.993562	321.18	ok
UTYYSTY	664.361	207.585	2672.92	1175.18	0.98847	246.2	ok
SUYTSTS	1917.66	168.045	4895.54	528.462	0.999672	450.68	ok
UYYSUUY	236.691	21.2667	1361.65	213.349	0.997325	125.28	ok
TUYYSYU	617.594	82.9917	2489.4	479.839	0.997616	229	ok
STYYUYT	686.139	73.2287	2669.93	401.074	0.99864	245.42	ok
TYYTUSU	262.502	15.3389	1442.57	143.913	0.998957	132.6	ok
SUSUTTY	377.455	41.8451	1843.49	320.75	0.997457	169.44	ok
SUYTYSU	1123.61	252.25	3624.93	1063.91	0.996421	333.12	ok
YTYUUYY	1673.27	695.83	4587.24	2377.88	0.991733	421.28	ok
TSYUSUU	706.966	81.3909	2721.38	438.772	0.998494	249.88	ok
UYYYTUT	113.144	17.592	821.421	273.815	0.984514	75.4	ok
SSYYTUU	195.127	31.3134	1209.34	354.072	0.989874	110.94	ok
TSYTSST	674.069	276.73	2719.13	1563.68	0.980612	249.36	ok
STYYYSY	357.188	125.12	1714.91	965.521	0.97223	157.14	ok
UUSTTTY	297.463	98.793	1531.5	849.977	0.971286	137.2	ok
UUYYUTU	470.409	69.3568	2093.54	465.511	0.996315	191.76	ok
TUYSYTS	518.397	50.9376	2253.04	326.662	0.998518	206.36	ok
TTYYSSY	904.371	151.39	3195.84	719.778	0.997524	292.48	ok
TTYTYYU	808.88	133.004	2939.12	663.619	0.997294	268.96	ok
UUSUUSU	291.89	80.2587	1498.41	693.861	0.979734	137.12	ok
USYTUYT	446.906	44.0866	2061.15	308.104	0.998278	188.6	ok
TTYYTUT	768.016	302.688	2940.7	1591.25	0.984277	269.08	ok
TSYTSTT	724.724	176.423	2728.19	929.497	0.993412	249.6	ok
YTYTUST	1097.95	307.992	3602.21	1322.86	0.994297	329.54	ok
UUSSUUT	225.459	36.7835	1280.09	372.764	0.990914	117.08	ok
UUYYTYT	416.915	80.5267	2003.07	591.434	0.99307	183.2	ok
TUSUUSY	290.243	117.928	1543.87	1045.29	0.958164	131.28	ok
TSYTTTT	504.01	85.337	2236.98	560.042	0.995501	204.56	ok
UYYTUSS	287.614	44.4604	1514.68	392.811	0.993346	138.48	ok
UUYUYST	1754.22	269.787	4660.15	890.782	0.998911	426	ok
YUYYSTS	468.38	110.146	2148.75	756.111	0.990799	196.38	ok
TUSUUTS	252.272	53.6165	1381.4	509.259	0.986097	126.2	ok
UTYSTYS	1019.75	113.677	3420.01	504.931	0.999023	312.32	ok
USYTTYU	432.48	104.021	1968.08	727.612	0.989243	179.72	ok
[truncated: 14,388 more rows]

[truncated: 2 more sheets: St-23-2_BulgeLoop_Kd, AptamerComparison_RawData]
